# Supplementary material for: Hidden impacts of climate change on biological responses of marine life
Source: Research Square preprint supplement (doi:10.21203/rs.3.rs-3085741/v1), 2023-07-27
Supplement: Supplementary file 1 [file 41e59422b2b7943cdbebf8f6.xlsx]

## Sheet: Sheet1
Biological response	Driver	n	p-value	Lower CI	Upper CI	ei	Qt	df	pQt
Fish
Behavior	T	38	0.349	-0.069	0.196	0.063	331.827	37	0
	pCO2	33	0.456	-0.237	0.106	-0.065	263.911	32	0
	T pCO2	43	0.776	-0.106	0.142	0.018	348.538	42	0
Calcification	T	4	0.196	-0.186	0.904	0.359	4107.23	3	0
	pCO2	3	0.079	-0.042	0.754	0.356	236.216	2	0
	T pCO2	4	0.066	-0.037	1.179	0.571	5576.73	3	0
Development	T	19	0.001	-0.382	-0.091	-0.236	2632.52	18	0
	pCO2	15	0.294	-0.205	0.062	-0.071	4690.18	14	0
	T pCO2	21	0	-0.506	-0.147	-0.327	12571.4	20	0
Growth	T	60	0.07	-0.006	0.156	0.075	3230.41	59	0
	pCO2	46	0.034	-0.089	-0.003	-0.046	1113.94	45	0
	T pCO2	70	0.297	-0.036	0.118	0.041	3426.59	69	0
Metabolism	T	47	0	0.21	0.45	0.33	1088.22	46	0
	pCO2	34	0.863	-0.125	0.105	-0.01	606.558	33	0
	T pCO2	50	0	0.138	0.446	0.292	983.115	49	0
Physiology	T	66	0.038	0.004	0.145	0.074	832.047	65	0
	pCO2	53	0.249	-0.075	0.019	-0.028	406.598	52	0
	T pCO2	70	0.343	-0.042	0.122	0.04	685.044	69	0
Reproduction	T	7	0.015	-0.711	-0.076	-0.394	68.539	6	0
	pCO2	6	0.8	-0.25	0.324	0.037	29.865	5	0
	T pCO2	10	0.051	-0.479	0.001	-0.239	66.186	9	0
Survival	T	30	0.005	-0.456	-0.08	-0.268	1320.93	29	0
	pCO2	24	0.089	-0.146	0.01	-0.068	897.887	23	0
	T pCO2	34	0	-0.629	-0.195	-0.412	3324.98	33	0
Invertebrates
Behavior	T	40	0.963	-0.187	0.179	-0.004	974.441	39	0
	pCO2	40	0.014	-0.398	-0.044	-0.221	369.551	39	0
	T pCO2	49	0.77	-0.133	0.18	0.023	1220.51	48	0
Biomechanics	T	18	0.68	-0.166	0.108	-0.029	160.038	17	0
	pCO2	23	0.009	-0.201	-0.029	-0.115	144.604	22	0
	T pCO2	24	0.312	-0.171	0.055	-0.058	302.242	23	0
Biodiversity	T	3	0.425	-0.145	0.344	0.1	6.605	2	0.037
	pCO2	9	0.387	-0.24	0.093	-0.073	21.655	8	0.006
	T pCO2	9	0.267	-0.337	0.093	-0.122	66.78	8	0
Calcification	T	43	0.11	-0.018	0.175	0.079	330.167	42	0
	pCO2	51	0.003	-0.362	-0.076	-0.219	34498.9	50	0
	T pCO2	56	0.005	-0.309	-0.057	-0.183	1194.62	55	0
Development	T	72	0.055	-0.301	0.003	-0.149	2933.63	71	0
	pCO2	108	0	-0.147	-0.043	-0.095	1972.81	107	0
	T pCO2	129	0	-0.419	-0.147	-0.283	9737.92	128	0
Growth	T	92	0.67	-0.086	0.055	-0.015	1579.83	91	0
	pCO2	124	0	-0.133	-0.043	-0.088	2658.05	123	0
	T pCO2	148	0.002	-0.161	-0.034	-0.098	5006.46	147	0
Metabolism	T	41	0	0.261	0.533	0.397	412.054	40	0
	pCO2	41	0.688	-0.099	0.065	-0.017	103.297	40	0
	T pCO2	51	0	0.282	0.569	0.426	739.638	50	0
Physiology	T	77	0.197	-0.207	0.043	-0.082	2229.19	76	0
	pCO2	82	0.736	-0.115	0.081	-0.017	1861.82	81	0
	T pCO2	94	0.54	-0.15	0.078	-0.036	2565.61	93	0
Reproduction	T	52	0.034	-0.172	-0.007	-0.09	460.534	51	0
	pCO2	55	0.036	-0.256	-0.009	-0.132	395.363	54	0
	T pCO2	92	0	-0.255	-0.075	-0.165	805.96	91	0
Survival	T	64	0.106	-0.211	0.02	-0.096	605.958	63	0
	pCO2	110	0	-0.255	-0.106	-0.18	7212.33	109	0
	T pCO2	120	0	-0.371	-0.143	-0.257	2513.03	119	0
