# Supplementary material for: Hidden impacts of climate change on biological responses of marine life
Source: Research Square preprint supplement (doi:10.21203/rs.3.rs-3085741/v1), 2023-07-27
Supplement: Supplementary file 1 [file b0926afdb67771deb1dbf3d1.pdf]

# Forest and Funnel plots

Juliette Jacquemont

03/08/2022

```
## Sensitivity analysis table
sensitivity <- tibble(taxa=character(), stressor=character(), metric=character(), Rosenthal=numeric(), th

## Inverts, Metabolism
InvertMetabolism <- Inverts[Category %in% c("Routine respiration", "Aerobic scope respiration")]
InvertMetabolism$Category <- c("Metabolism")
InvertMet <- MA_TpH("inverts", "Metabolism", InvertMetabolism, sensitivity)

##
## Random-Effects Model (k = 41; tau^2 estimator: REML)
##
## tau^2 (estimated amount of total heterogeneity): 0.1562 (SE = 0.0431)
## tau (square root of estimated tau^2 value):      0.3952
## I^2 (total heterogeneity / total variability):   91.76%
## H^2 (total variability / sampling variability):  12.14
##
## Test for Heterogeneity:
## Q(df = 40) = 412.0536, p-val < .0001
##
## Model Results:
##
## estimate      se      zval      pval      ci.lb      ci.ub
## 0.3971 0.0694 5.7188 <.0001 0.2610 0.5332 ***
##
## ---
## Signif. codes:  0 '***' 0.001 '**' 0.01 '*' 0.05 '.' 0.1 ' ' 1
```

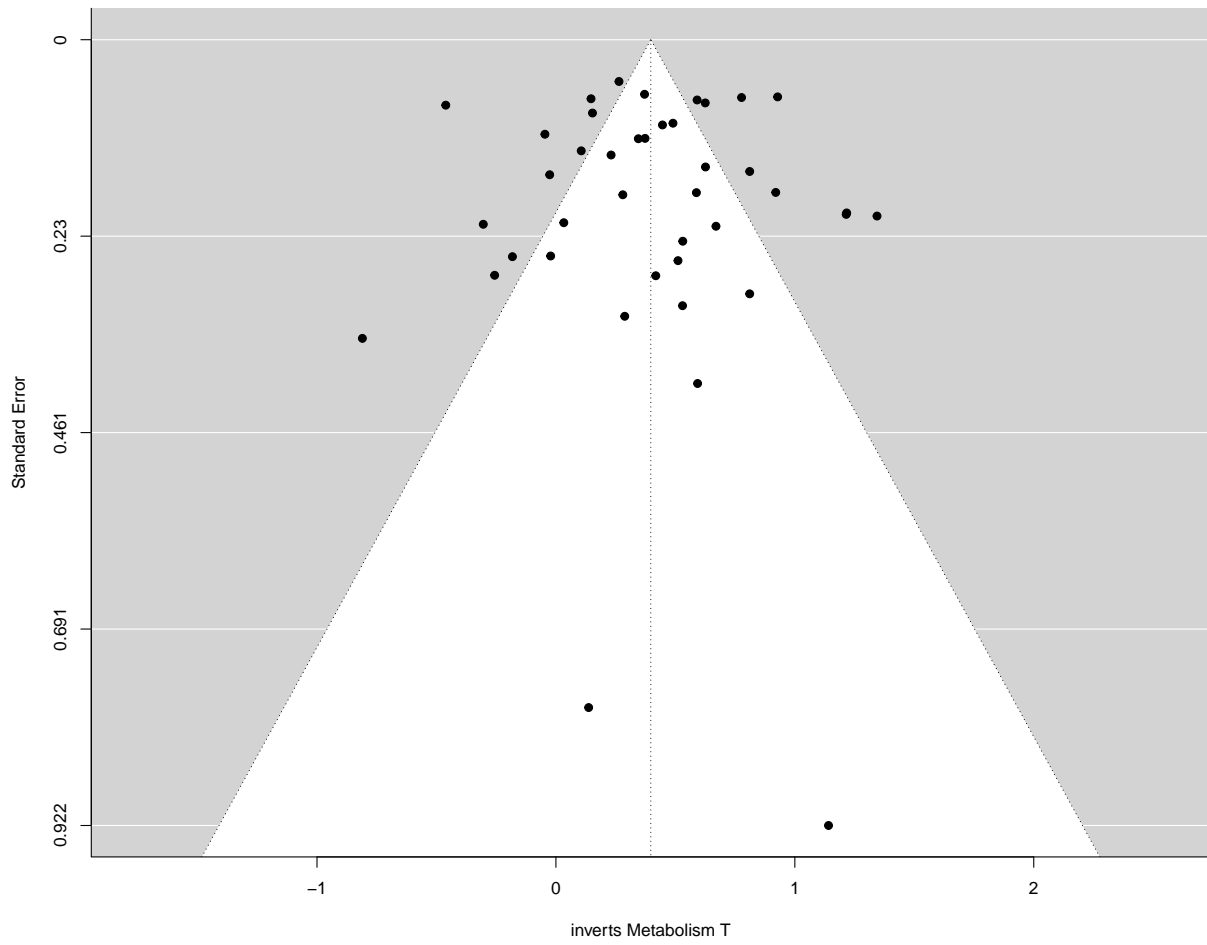

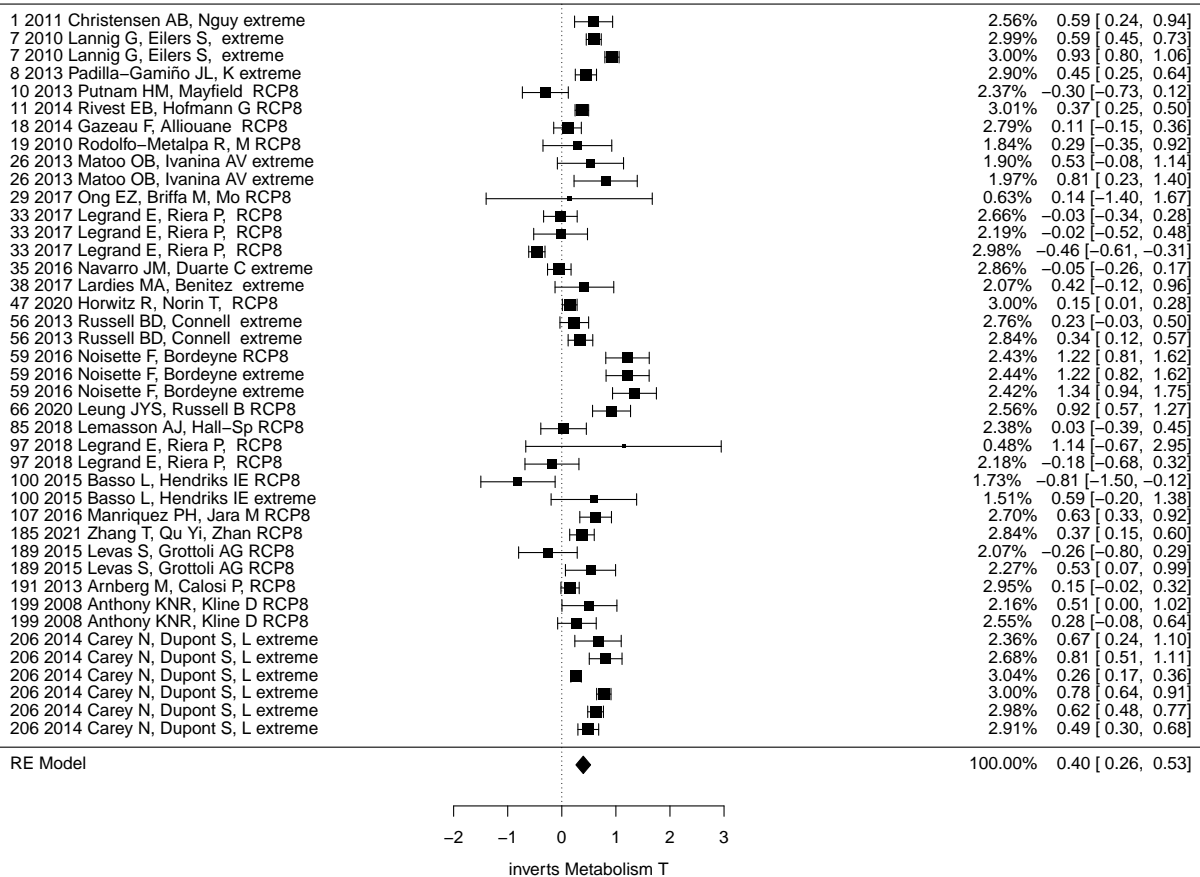

```
##
## Random-Effects Model (k = 41; tau^2 estimator: REML)
##
## tau^2 (estimated amount of total heterogeneity): 0.0385 (SE = 0.0147)
## tau (square root of estimated tau^2 value):      0.1961
## I^2 (total heterogeneity / total variability):   70.42%
## H^2 (total variability / sampling variability):   3.38
##
## Test for Heterogeneity:
## Q(df = 40) = 103.2966, p-val < .0001
##
## Model Results:
##
## estimate      se      zval      pval      ci.lb      ci.ub
## -0.0168  0.0417  -0.4017  0.6879  -0.0985  0.0650
##
## ---
## Signif. codes:  0 '***' 0.001 '**' 0.01 '*' 0.05 '.' 0.1 ' ' 1
```

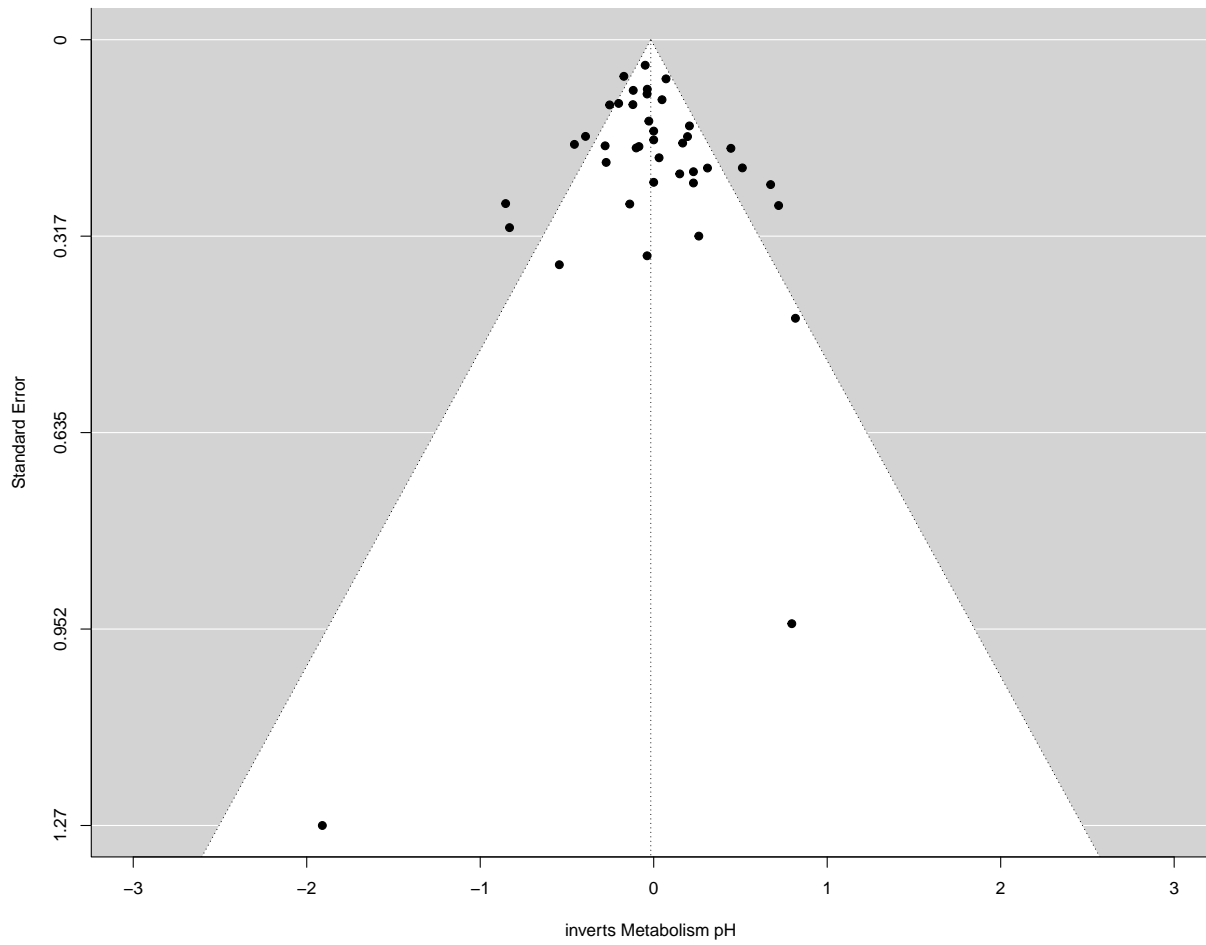

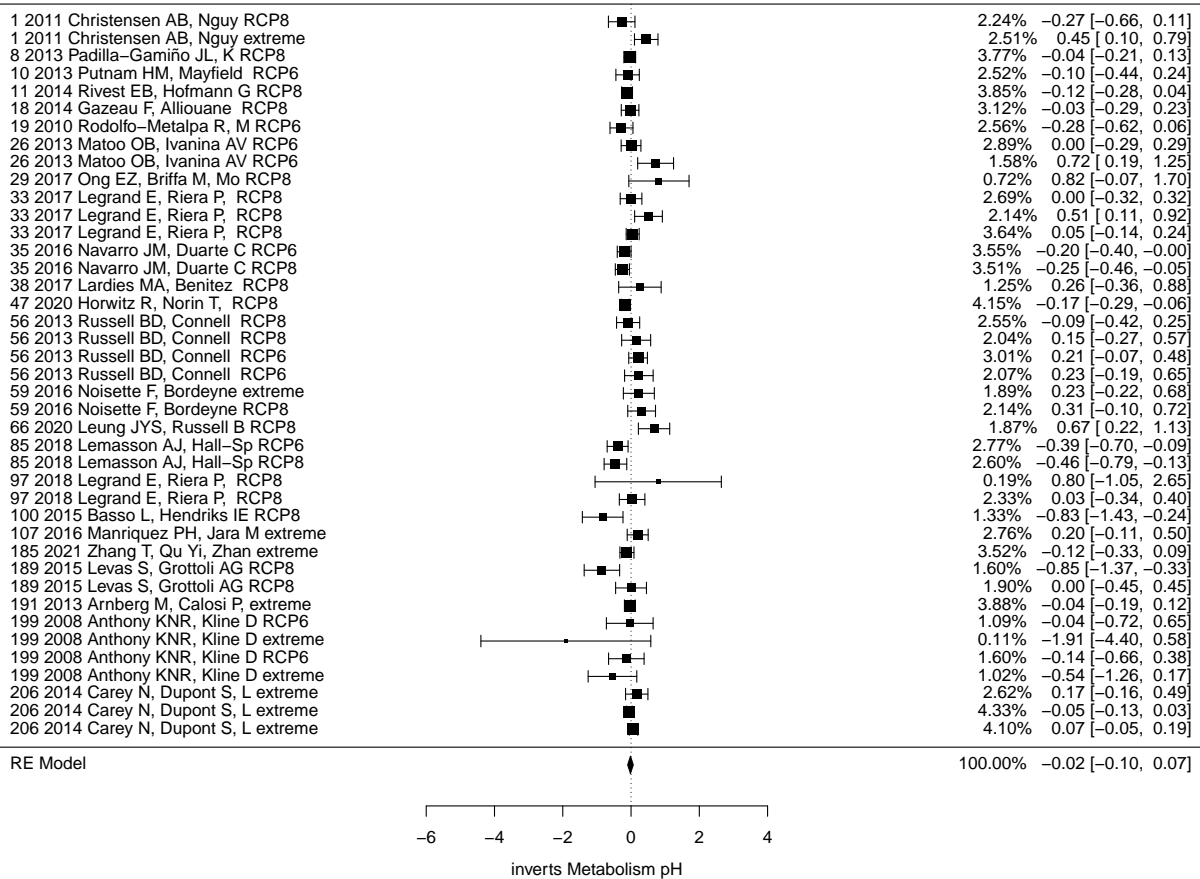

```

##
## Random-Effects Model (k = 51; tau^2 estimator: REML)
##
## tau^2 (estimated amount of total heterogeneity): 0.2212 (SE = 0.0528)
## tau (square root of estimated tau^2 value):      0.4703
## I^2 (total heterogeneity / total variability):   93.15%
## H^2 (total variability / sampling variability):  14.61
##
## Test for Heterogeneity:
## Q(df = 50) = 739.6382, p-val < .0001
##
## Model Results:
##
## estimate      se      zval      pval      ci.lb      ci.ub
## 0.4255 0.0732 5.8133 <.0001 0.2821 0.5690 ***
##
## ---
## Signif. codes:  0 '***' 0.001 '**' 0.01 '*' 0.05 '.' 0.1 ' ' 1

```

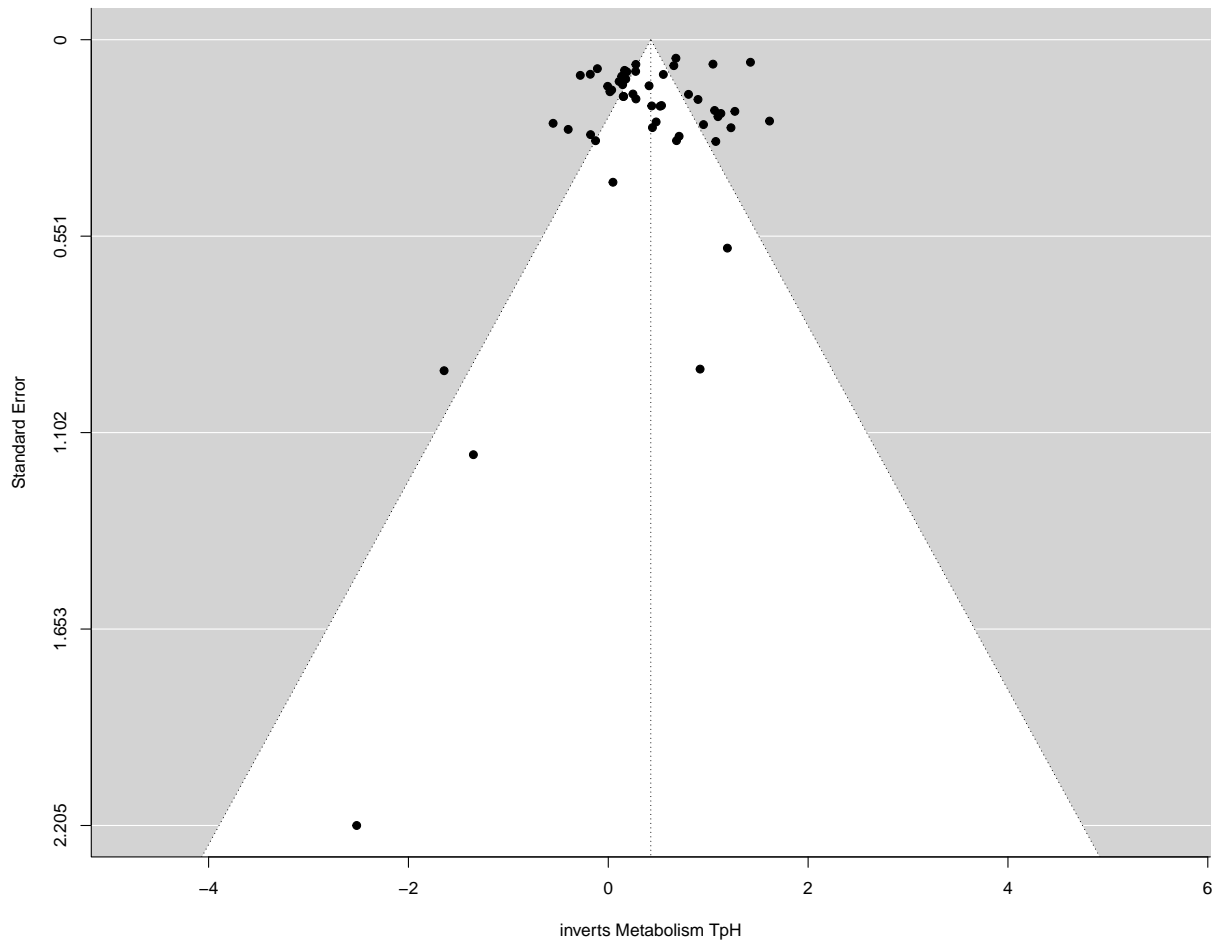

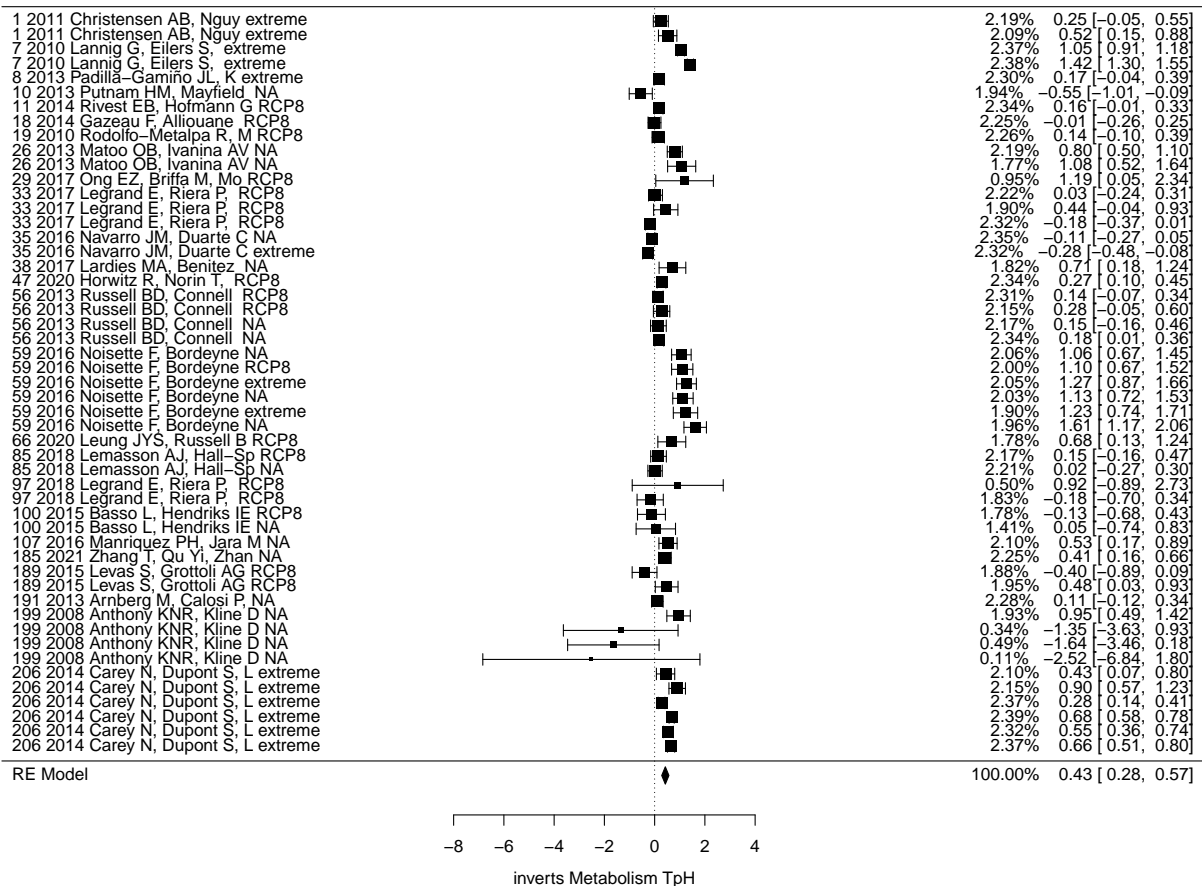

```

Abs_InvertMet <- MA_TpH_abs("inverts", "Metabolism", InvertMetabolism)

## Fish, Metabolism
FishMetabolism <- Fish[Category %in% c("Routine respiration", "Aerobic scope respiration")]
FishMetabolism$Category <- c("Metabolism")
FishMet <- MA_TpH("fish", "Metabolism", FishMetabolism, sensitivity)

##
## Random-Effects Model (k = 47; tau^2 estimator: REML)
##
## tau^2 (estimated amount of total heterogeneity): 0.1594 (SE = 0.0366)
## tau (square root of estimated tau^2 value): 0.3993
## I^2 (total heterogeneity / total variability): 98.83%
## H^2 (total variability / sampling variability): 85.32
##
## Test for Heterogeneity:
## Q(df = 46) = 1088.2175, p-val < .0001
##
## Model Results:

```

```

##
## estimate      se    zval    pval   ci.lb   ci.ub
## 0.3298 0.0613 5.3835 <.0001 0.2097 0.4499 ***
##
## ---
## Signif. codes:  0 '***' 0.001 '**' 0.01 '*' 0.05 '.' 0.1 ' ' 1

```

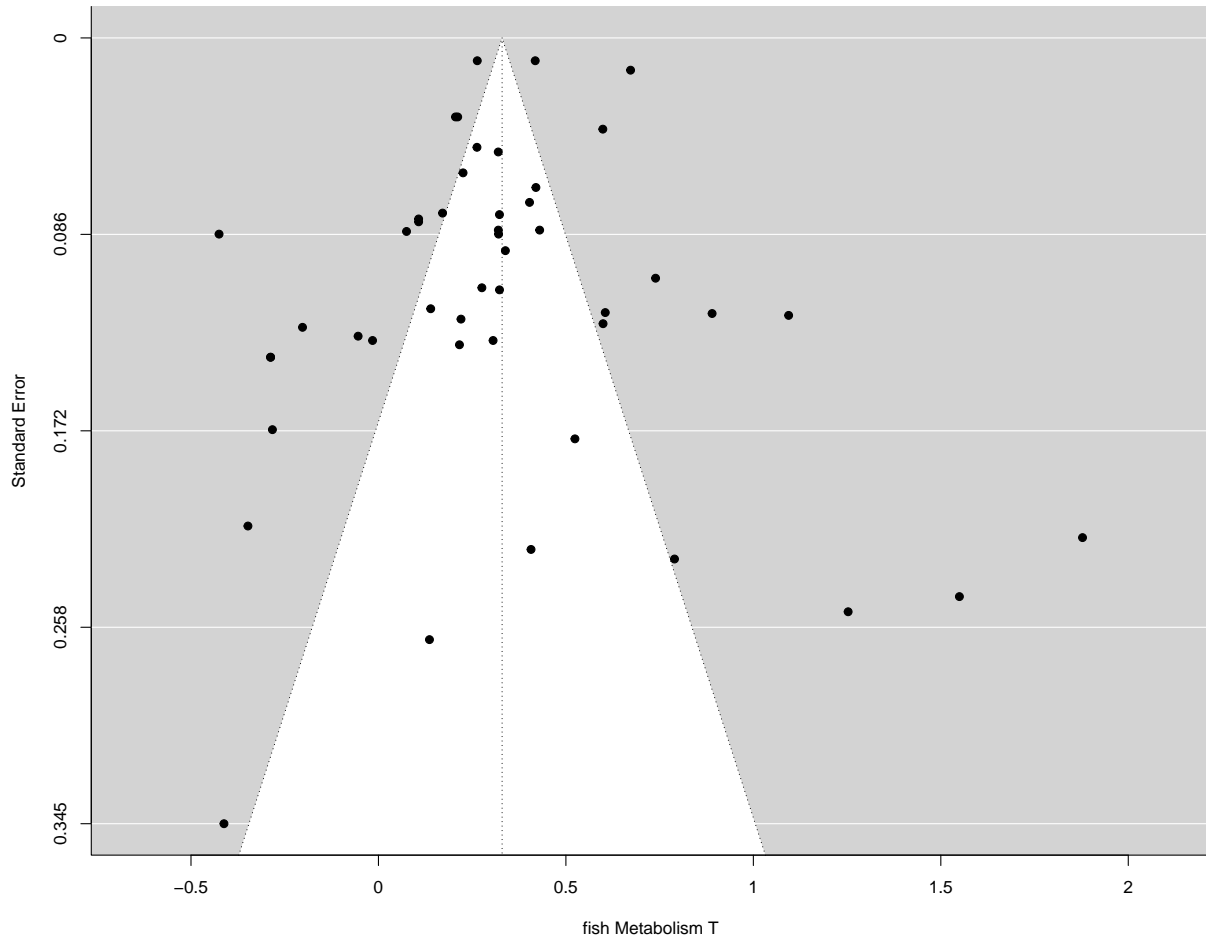

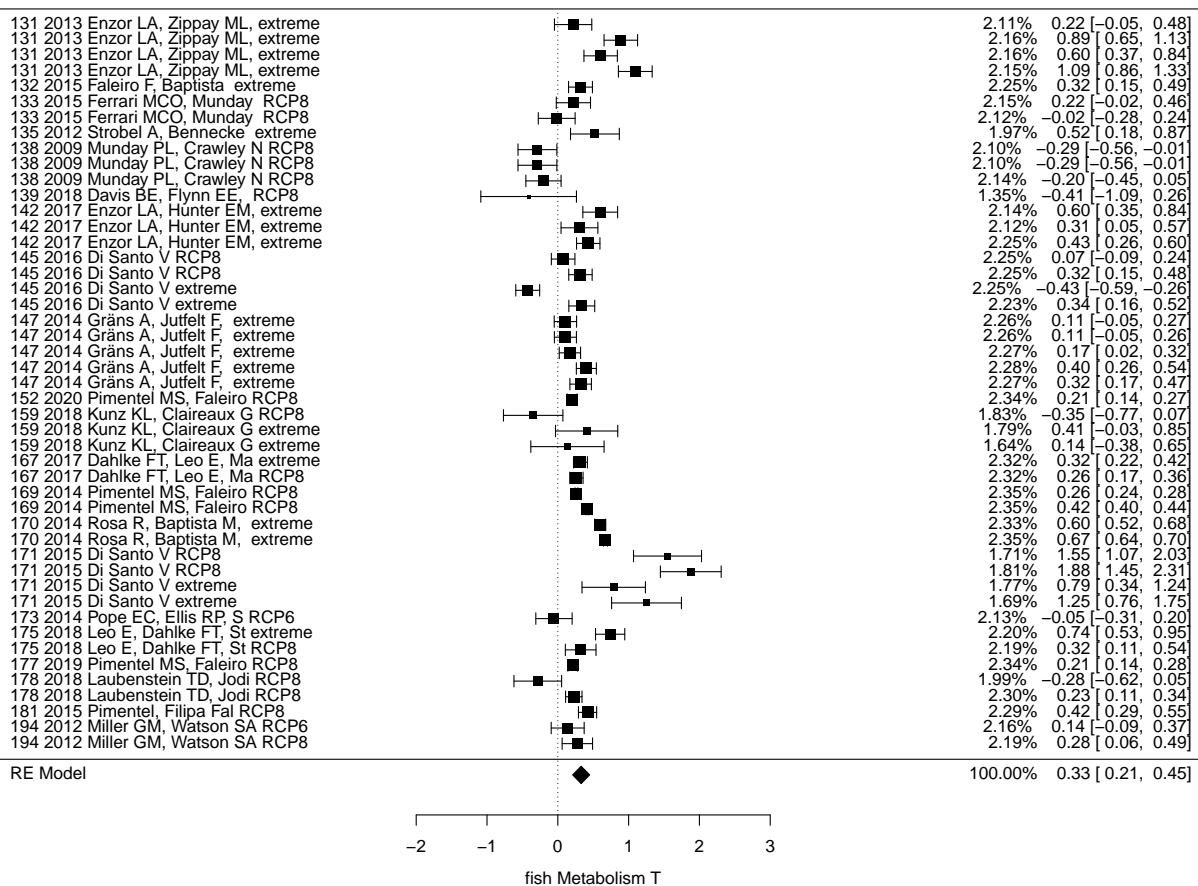

```

##
## Random-Effects Model (k = 34; tau^2 estimator: REML)
##
## tau^2 (estimated amount of total heterogeneity): 0.0981 (SE = 0.0284)
## tau (square root of estimated tau^2 value):      0.3132
## I^2 (total heterogeneity / total variability):   98.54%
## H^2 (total variability / sampling variability):  68.54
##
## Test for Heterogeneity:
## Q(df = 33) = 606.5580, p-val < .0001
##
## Model Results:
##
## estimate      se      zval      pval      ci.lb      ci.ub
## -0.0101  0.0588  -0.1723  0.8632  -0.1254  0.1051
##
## ---
## Signif. codes:  0 '***' 0.001 '**' 0.01 '*' 0.05 '.' 0.1 ' ' 1

```

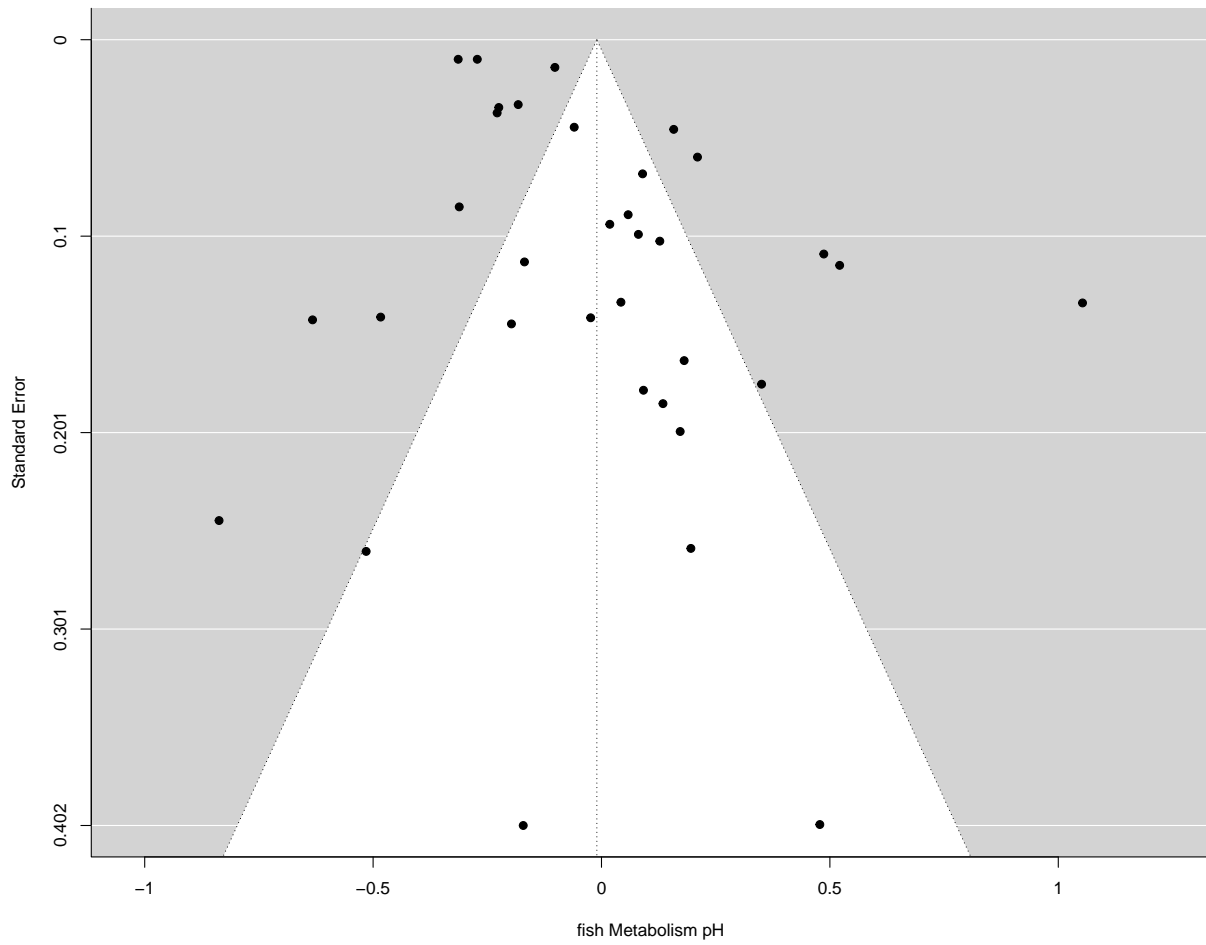

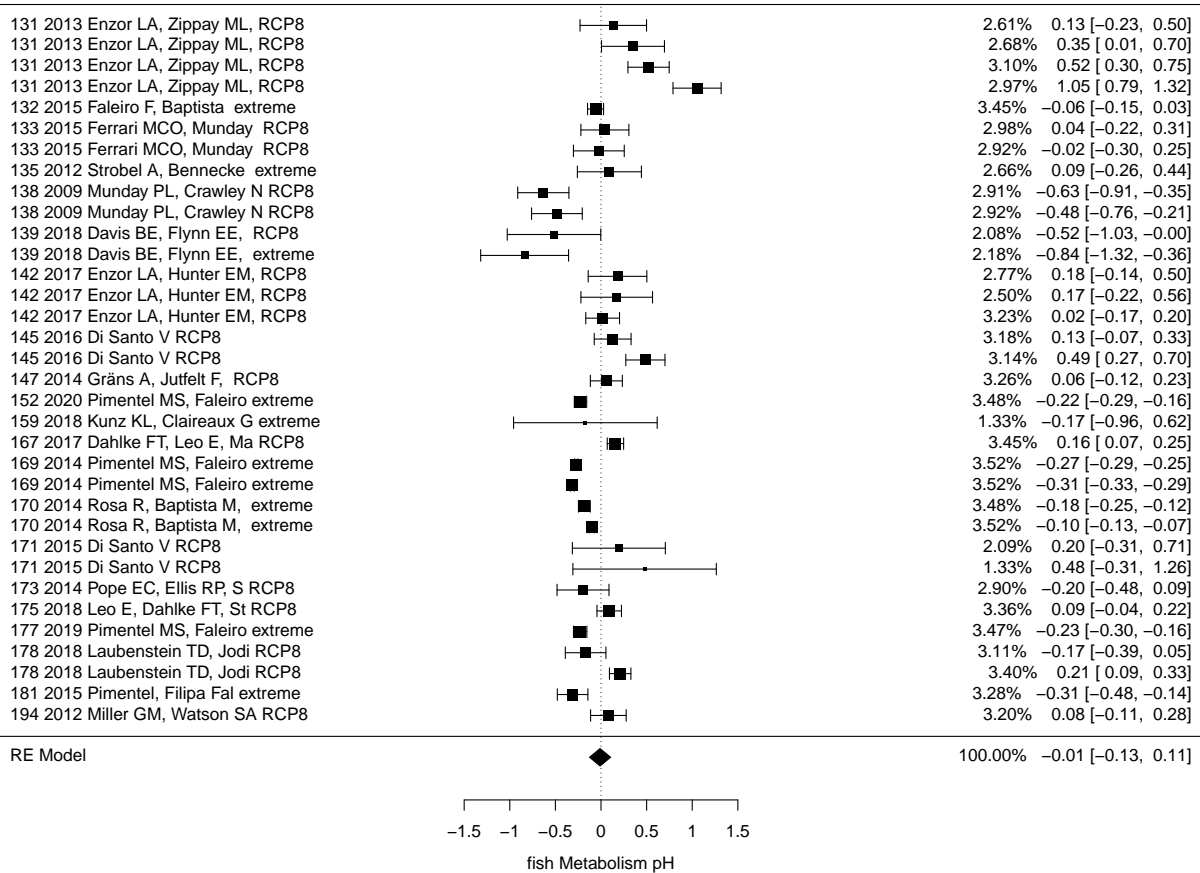

```
##
## Random-Effects Model (k = 50; tau^2 estimator: REML)
##
## tau^2 (estimated amount of total heterogeneity): 0.2894 (SE = 0.0622)
## tau (square root of estimated tau^2 value):      0.5380
## I^2 (total heterogeneity / total variability):   99.25%
## H^2 (total variability / sampling variability):  132.50
##
## Test for Heterogeneity:
## Q(df = 49) = 983.1153, p-val < .0001
##
## Model Results:
##
## estimate      se      zval      pval      ci.lb      ci.ub
## 0.2918 0.0786 3.7134 0.0002 0.1378 0.4458 ***
##
## ---
## Signif. codes:  0 '***' 0.001 '**' 0.01 '*' 0.05 '.' 0.1 ' ' 1
```



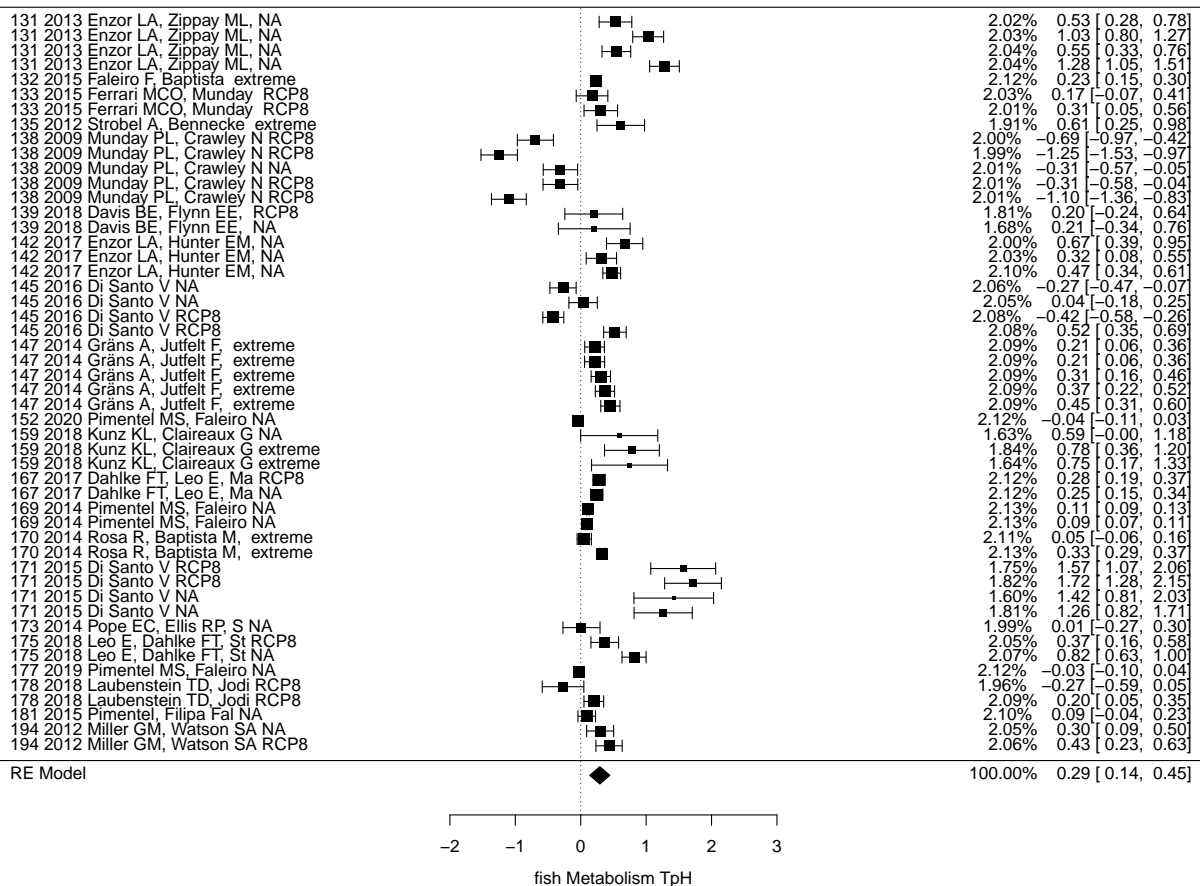

```

Abs_FishMet <- MA_TpH_abs("fish","Metabolism",FishMetabolism)

## Invertebrates, Calcification
InvertCalci <- MA_TpH("inverts","Calcification", Inverts,sensitivity)

##
## Random-Effects Model (k = 43; tau^2 estimator: REML)
##
## tau^2 (estimated amount of total heterogeneity): 0.0683 (SE = 0.0209)
## tau (square root of estimated tau^2 value):      0.2614
## I^2 (total heterogeneity / total variability):    97.61%
## H^2 (total variability / sampling variability):    41.76
##
## Test for Heterogeneity:
## Q(df = 42) = 330.1670, p-val < .0001
##
## Model Results:
##
## estimate      se      zval      pval      ci.lb      ci.ub
## 0.0787 0.0492 1.5992 0.1098 -0.0178 0.1752

```

```
##
## ---
## Signif. codes:  0 '***' 0.001 '**' 0.01 '*' 0.05 '.' 0.1 ' ' 1
```

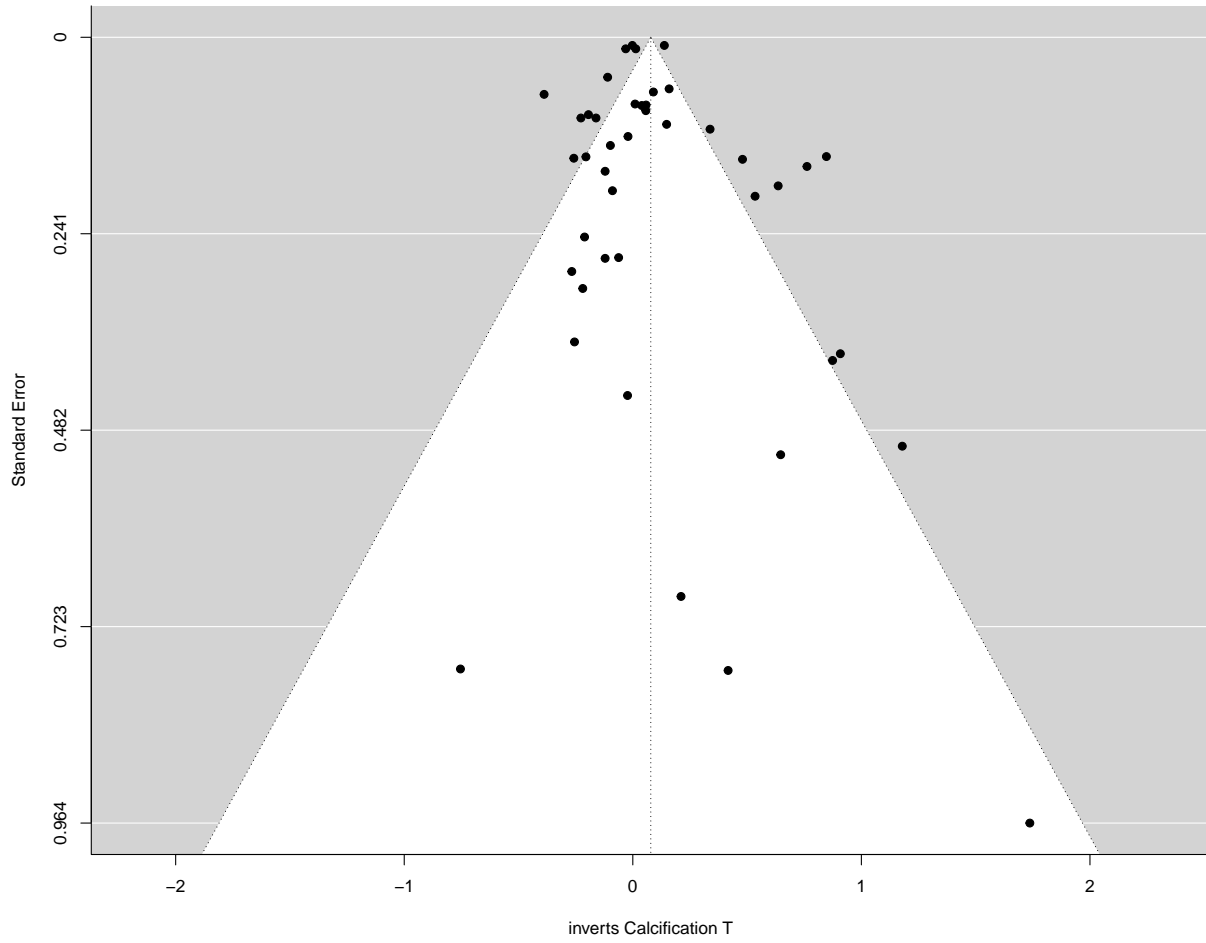

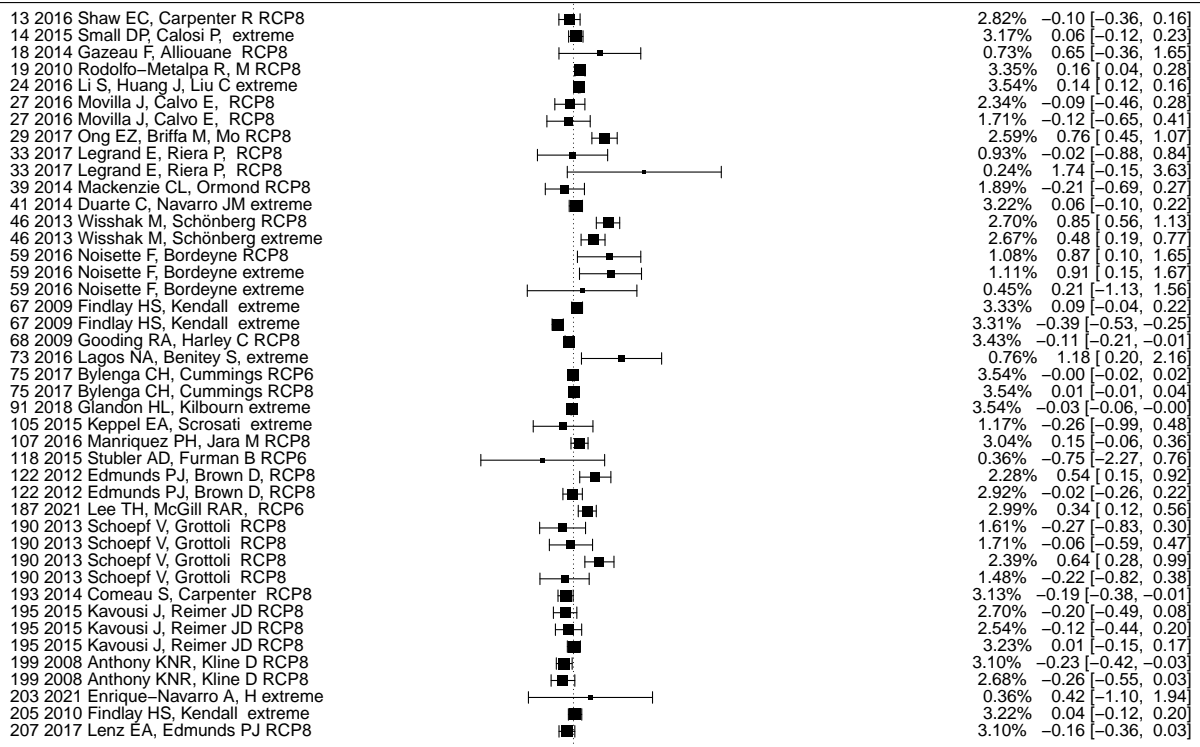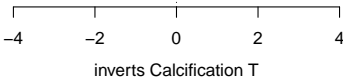

```

##
## Random-Effects Model (k = 51; tau^2 estimator: REML)
##
## tau^2 (estimated amount of total heterogeneity): 0.2240 (SE = 0.0527)
## tau (square root of estimated tau^2 value):      0.4733
## I^2 (total heterogeneity / total variability):   99.26%
## H^2 (total variability / sampling variability):  134.60
##
## Test for Heterogeneity:
## Q(df = 50) = 34498.9208, p-val < .0001
##
## Model Results:
##
## estimate      se      zval      pval      ci.lb      ci.ub      **
## -0.2193  0.0730  -3.0036  0.0027  -0.3624  -0.0762
##
## ---
## Signif. codes:  0 '***' 0.001 '**' 0.01 '*' 0.05 '.' 0.1 ' ' 1

```

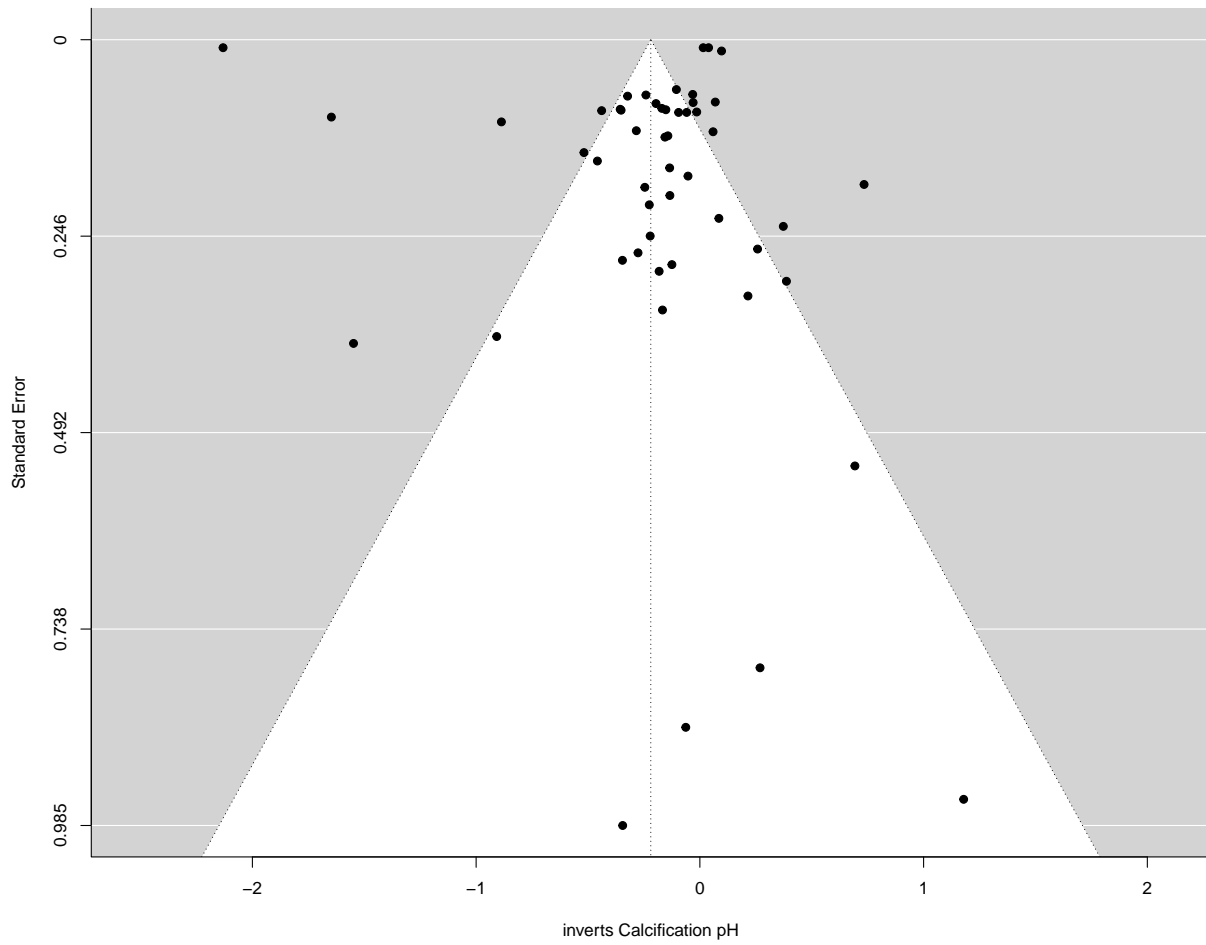

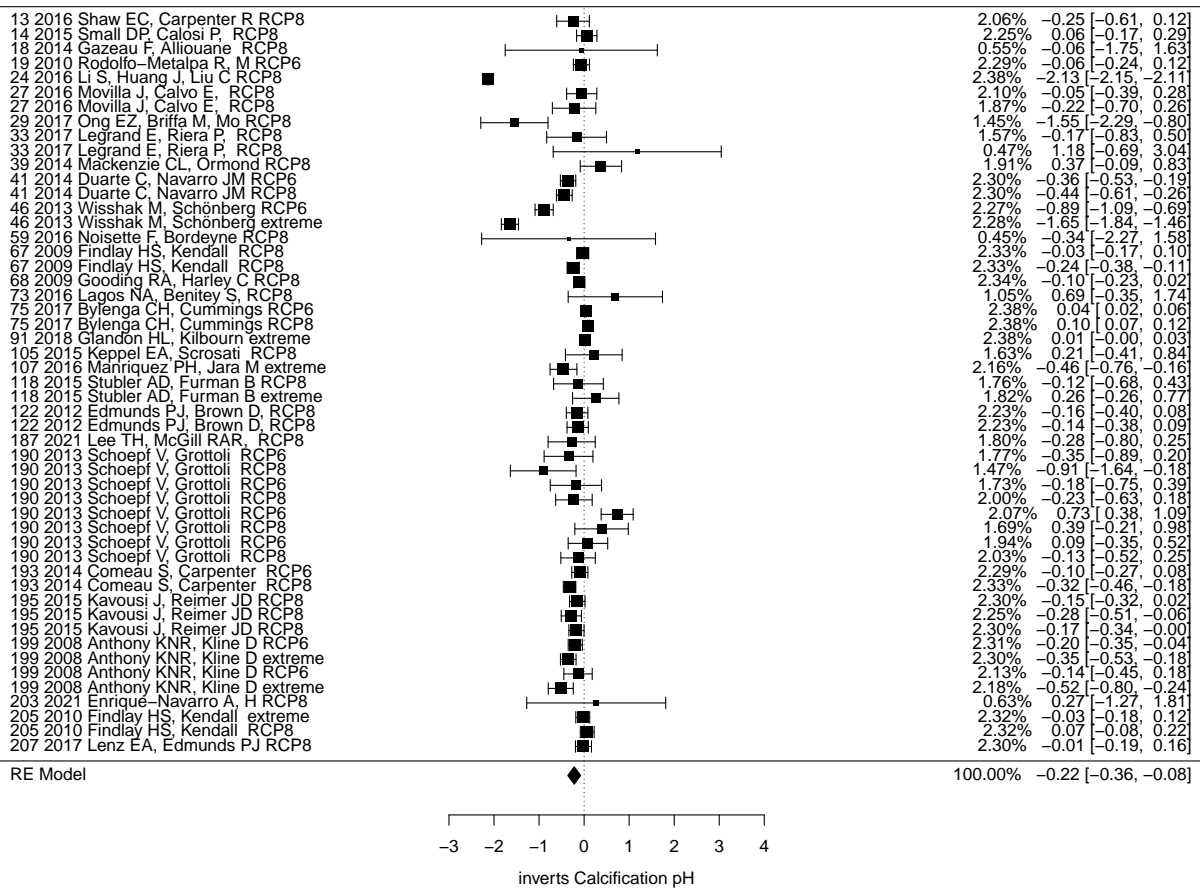

```

##
## Random-Effects Model (k = 56; tau^2 estimator: REML)
##
## tau^2 (estimated amount of total heterogeneity): 0.1765 (SE = 0.0418)
## tau (square root of estimated tau^2 value): 0.4201
## I^2 (total heterogeneity / total variability): 99.17%
## H^2 (total variability / sampling variability): 121.08
##
## Test for Heterogeneity:
## Q(df = 55) = 1194.6217, p-val < .0001
##
## Model Results:
##
## estimate se zval pval ci.lb ci.ub
## -0.1829 0.0644 -2.8391 0.0045 -0.3091 -0.0566 **
##
## ---
## Signif. codes: 0 '***' 0.001 '**' 0.01 '*' 0.05 '.' 0.1 ' ' 1

```

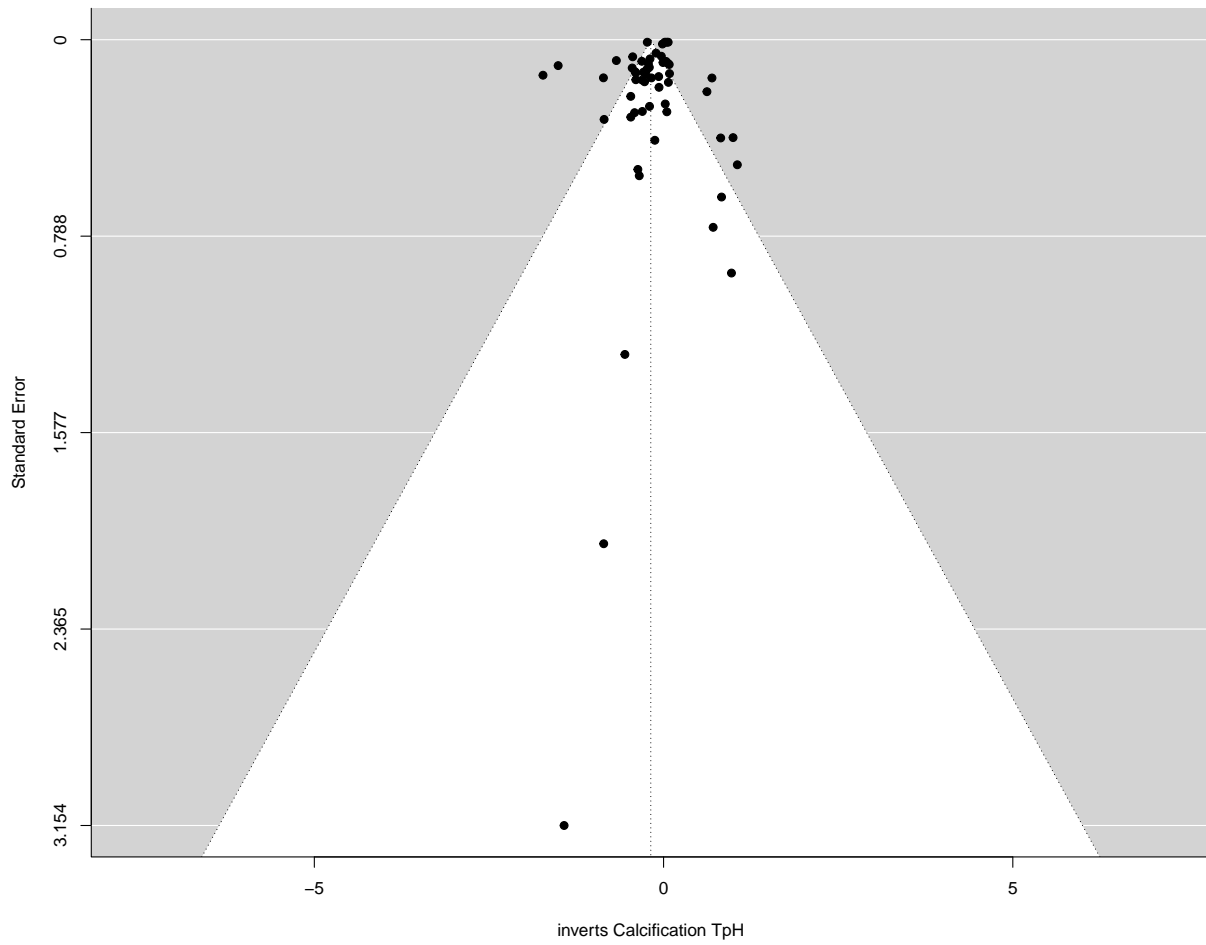

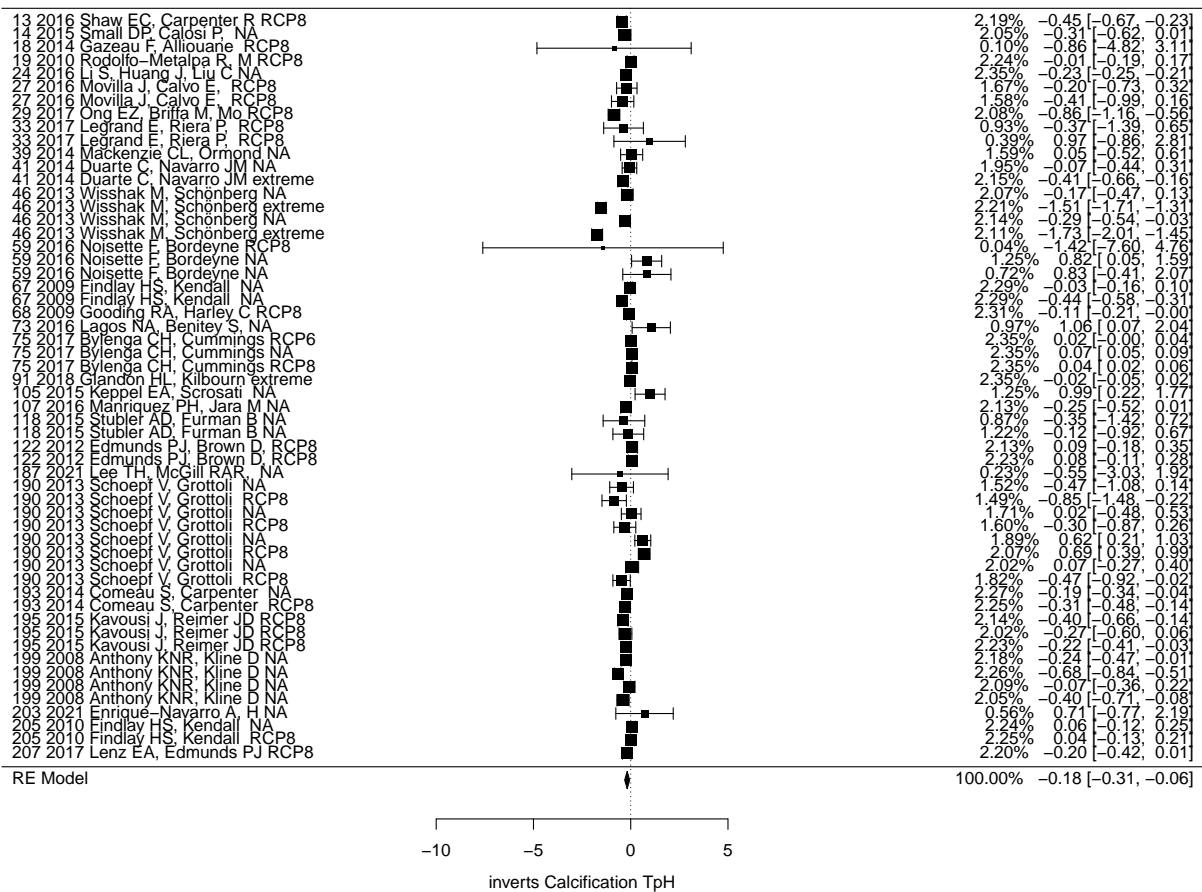

```
Abs_InvertCalci <- MA_TpH_abs("inverts","Calcification", Inverts)
## Fish, Calcification
FishCalci <- MA_TpH("fish","Calcification", Fish,sensitivity)
```

```
##
## Random-Effects Model (k = 4; tau^2 estimator: REML)
##
## tau^2 (estimated amount of total heterogeneity): 0.3002 (SE = 0.2523)
## tau (square root of estimated tau^2 value): 0.5479
## I^2 (total heterogeneity / total variability): 99.86%
## H^2 (total variability / sampling variability): 715.23
##
## Test for Heterogeneity:
## Q(df = 3) = 4107.2296, p-val < .0001
##
## Model Results:
##
## estimate se zval pval ci.lb ci.ub
## 0.3592 0.2780 1.2924 0.1962 -0.1856 0.9040
##
```

```
## ---  
## Signif. codes:  0 '***' 0.001 '**' 0.01 '*' 0.05 '.' 0.1 ' ' 1
```

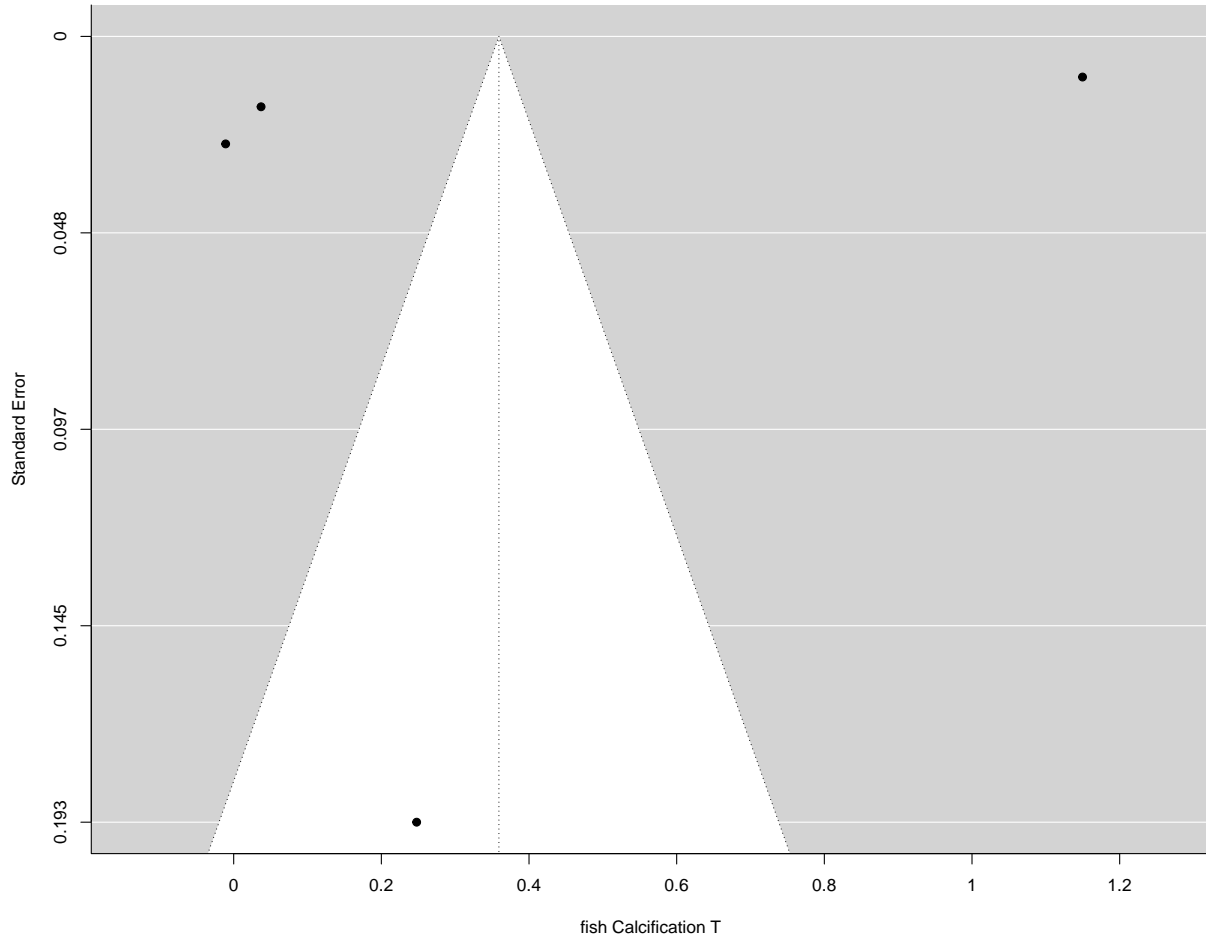

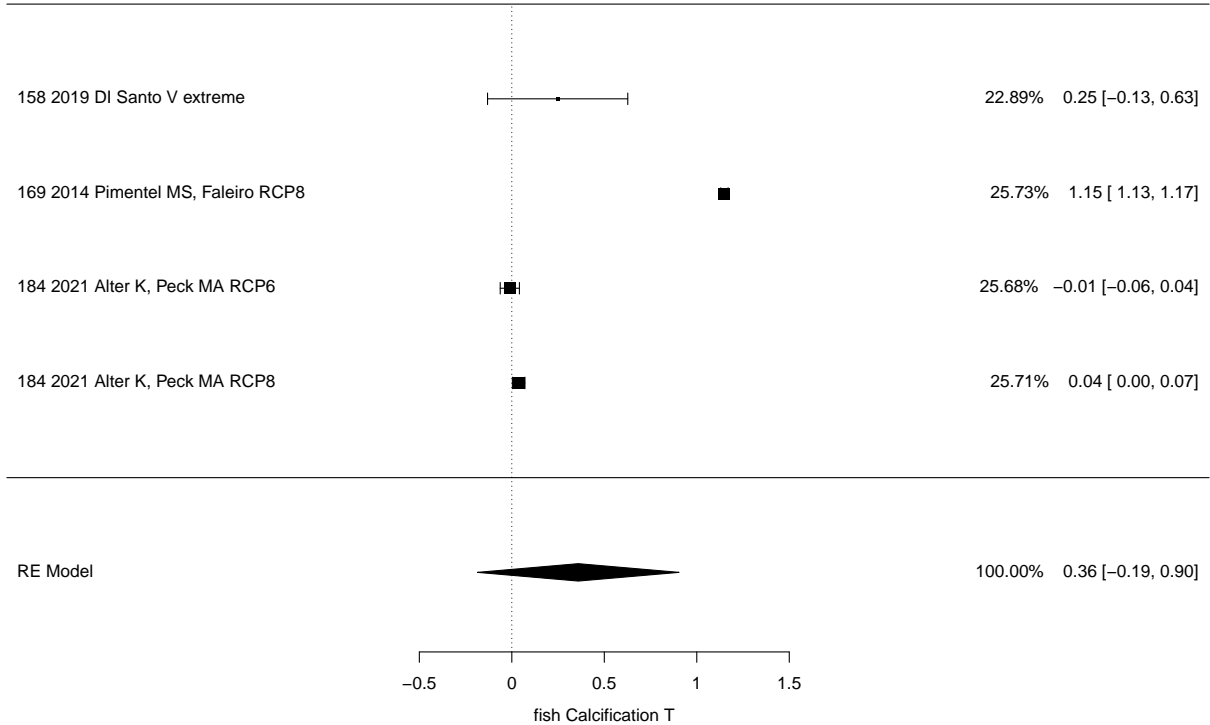

```

##
## Random-Effects Model (k = 3; tau^2 estimator: REML)
##
## tau^2 (estimated amount of total heterogeneity): 0.1139 (SE = 0.1241)
## tau (square root of estimated tau^2 value):      0.3375
## I^2 (total heterogeneity / total variability):   99.57%
## H^2 (total variability / sampling variability):  231.53
##
## Test for Heterogeneity:
## Q(df = 2) = 236.2163, p-val < .0001
##
## Model Results:
##
## estimate      se      zval      pval      ci.lb      ci.ub
## 0.3564 0.2031 1.7546 0.0793 -0.0417 0.7544
##
## ---
## Signif. codes:  0 '***' 0.001 '**' 0.01 '*' 0.05 '.' 0.1 ' ' 1

```

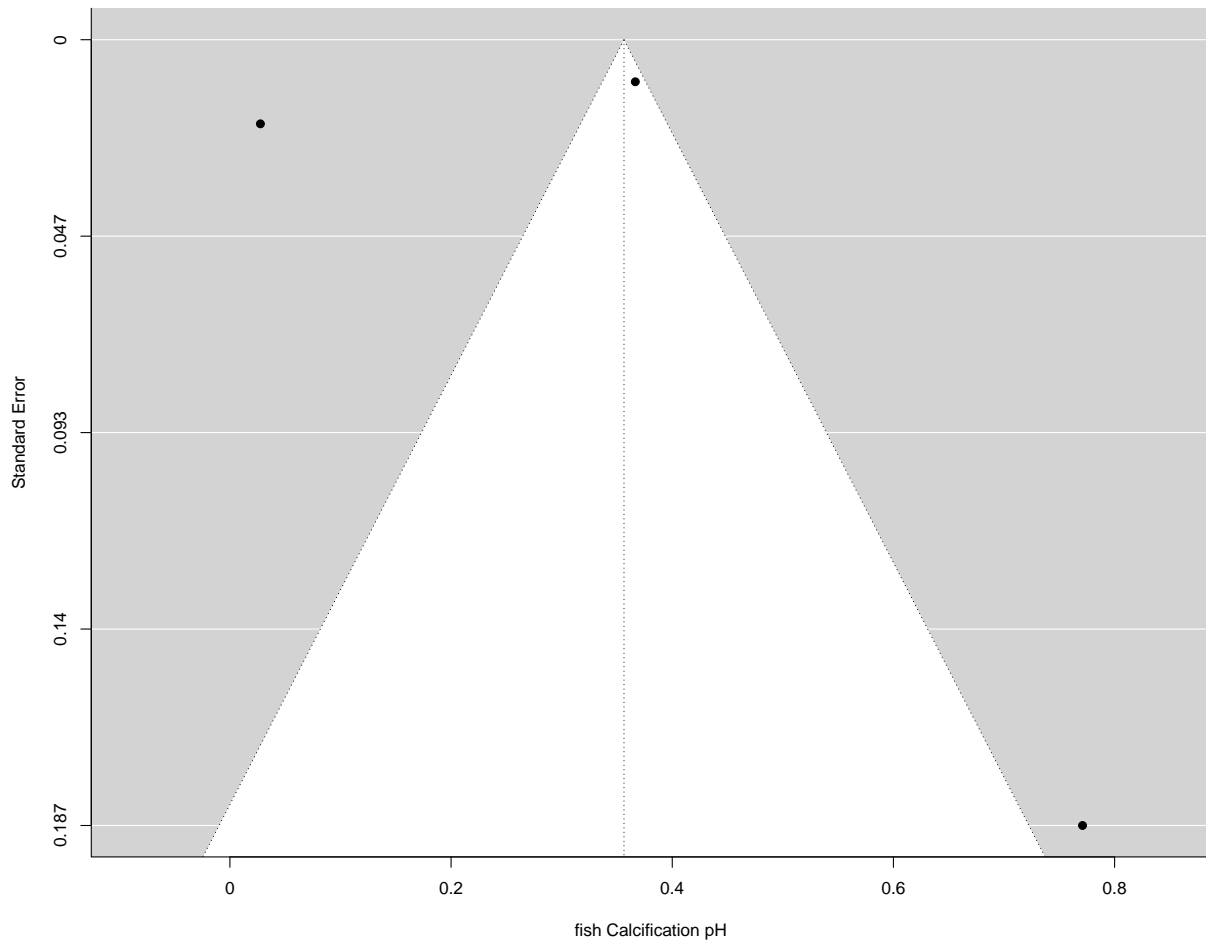

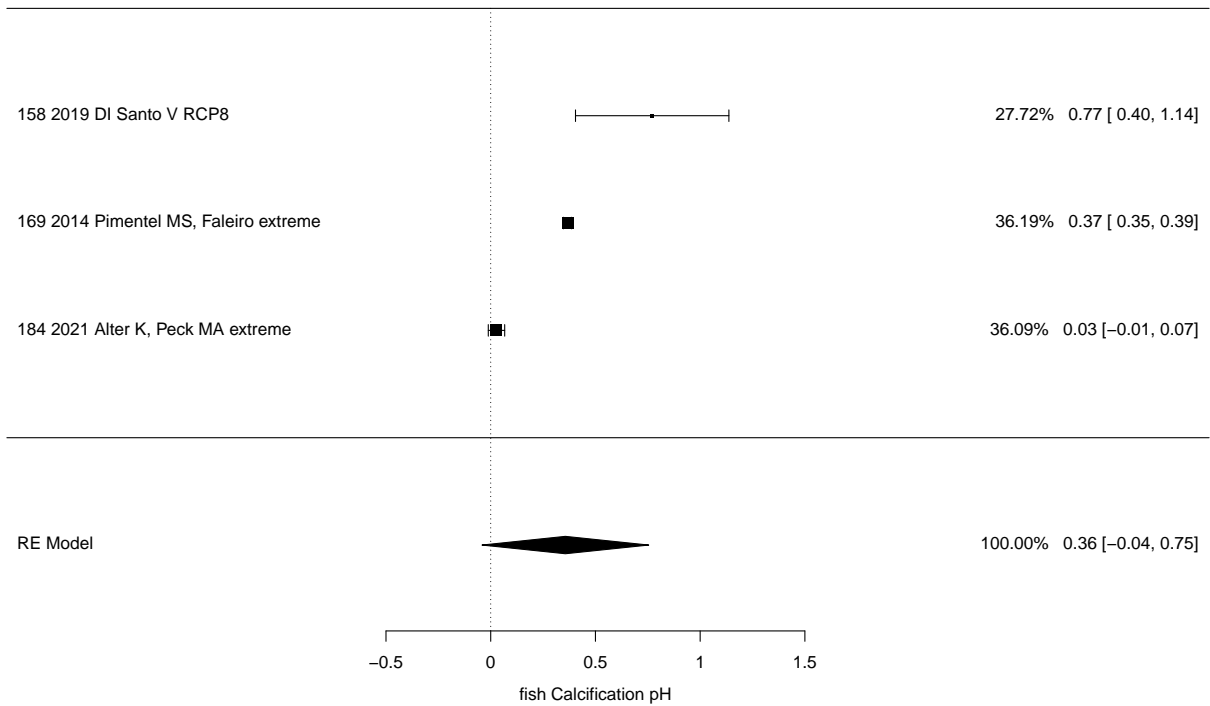

```

##
## Random-Effects Model (k = 4; tau^2 estimator: REML)
##
## tau^2 (estimated amount of total heterogeneity): 0.3778 (SE = 0.3143)
## tau (square root of estimated tau^2 value):      0.6147
## I^2 (total heterogeneity / total variability):   99.91%
## H^2 (total variability / sampling variability):  1067.74
##
## Test for Heterogeneity:
## Q(df = 3) = 5576.7308, p-val < .0001
##
## Model Results:
##
## estimate      se      zval      pval      ci.lb      ci.ub
## 0.5707 0.3102 1.8397 0.0658 -0.0373 1.1788
##
## ---
## Signif. codes:  0 '***' 0.001 '**' 0.01 '*' 0.05 '.' 0.1 ' ' 1

```

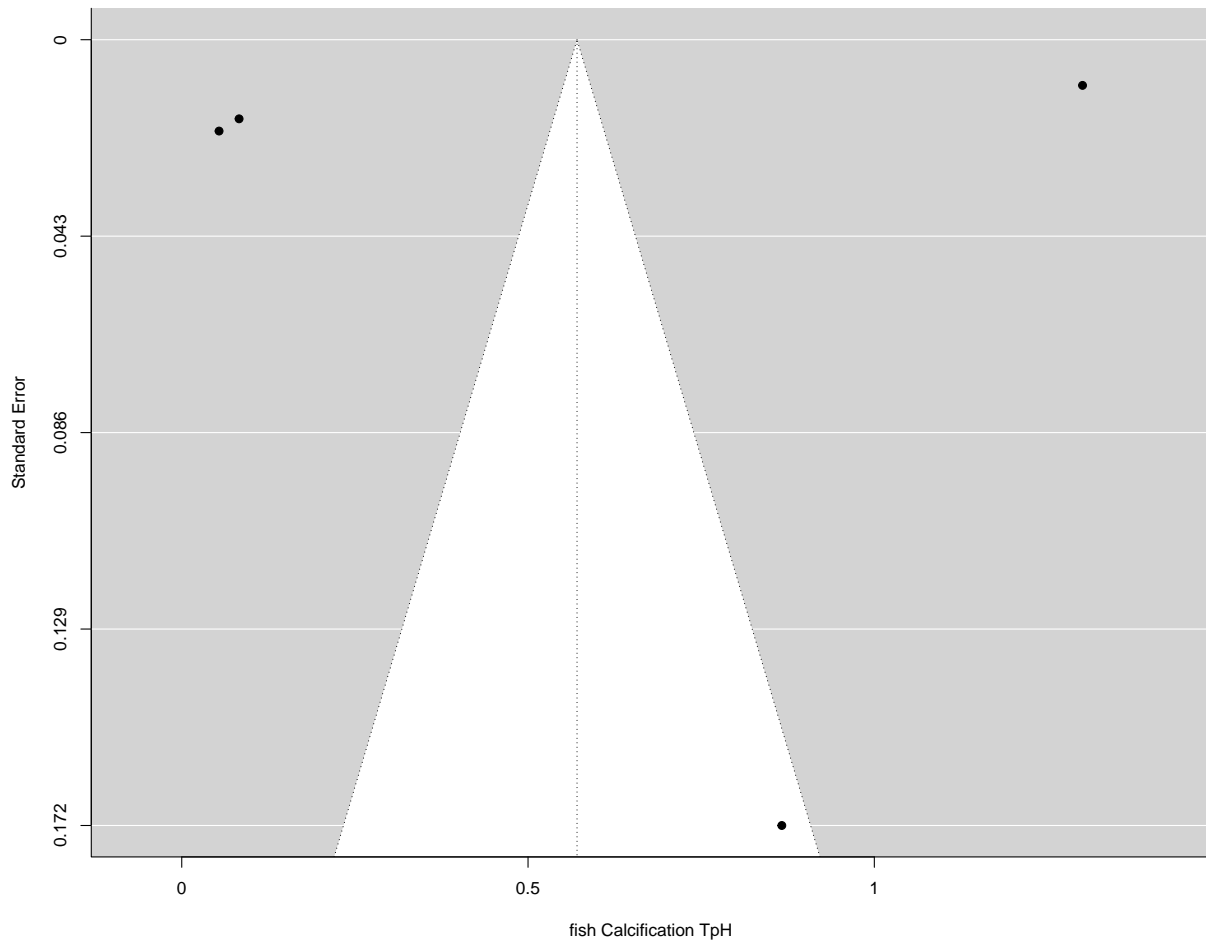

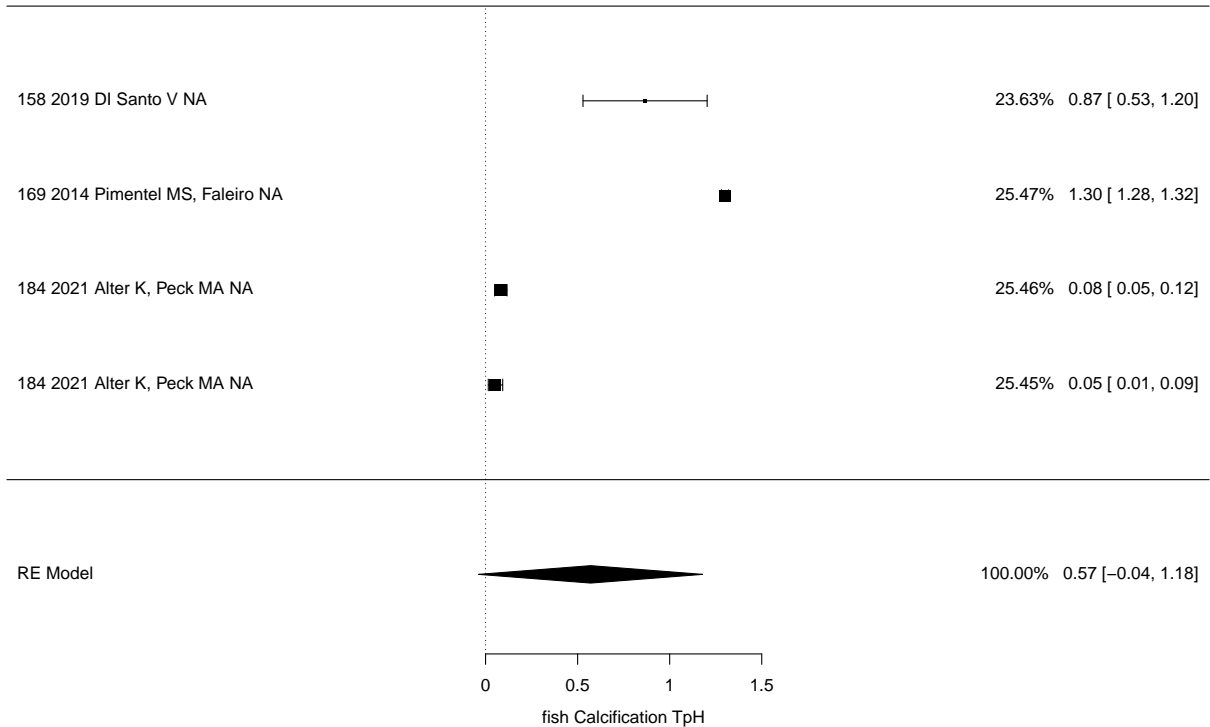

```
Abs_FishCalci <- MA_TpH_abs("fish", "Calcification", Fish)

## Invertebrate, Biodiversity
InvertBiodiv <- MA_TpH("inverts", "Biodiversity", Inverts, sensitivity)
```

```
##
## Random-Effects Model (k = 3; tau^2 estimator: REML)
##
## tau^2 (estimated amount of total heterogeneity): 0.0326 (SE = 0.0468)
## tau (square root of estimated tau^2 value): 0.1806
## I^2 (total heterogeneity / total variability): 69.75%
## H^2 (total variability / sampling variability): 3.31
##
## Test for Heterogeneity:
## Q(df = 2) = 6.6051, p-val = 0.0368
##
## Model Results:
##
## estimate se zval pval ci.lb ci.ub
## 0.0996 0.1249 0.7974 0.4252 -0.1452 0.3443
```

```
##
## ---
## Signif. codes:  0 '***' 0.001 '**' 0.01 '*' 0.05 '.' 0.1 ' ' 1
```

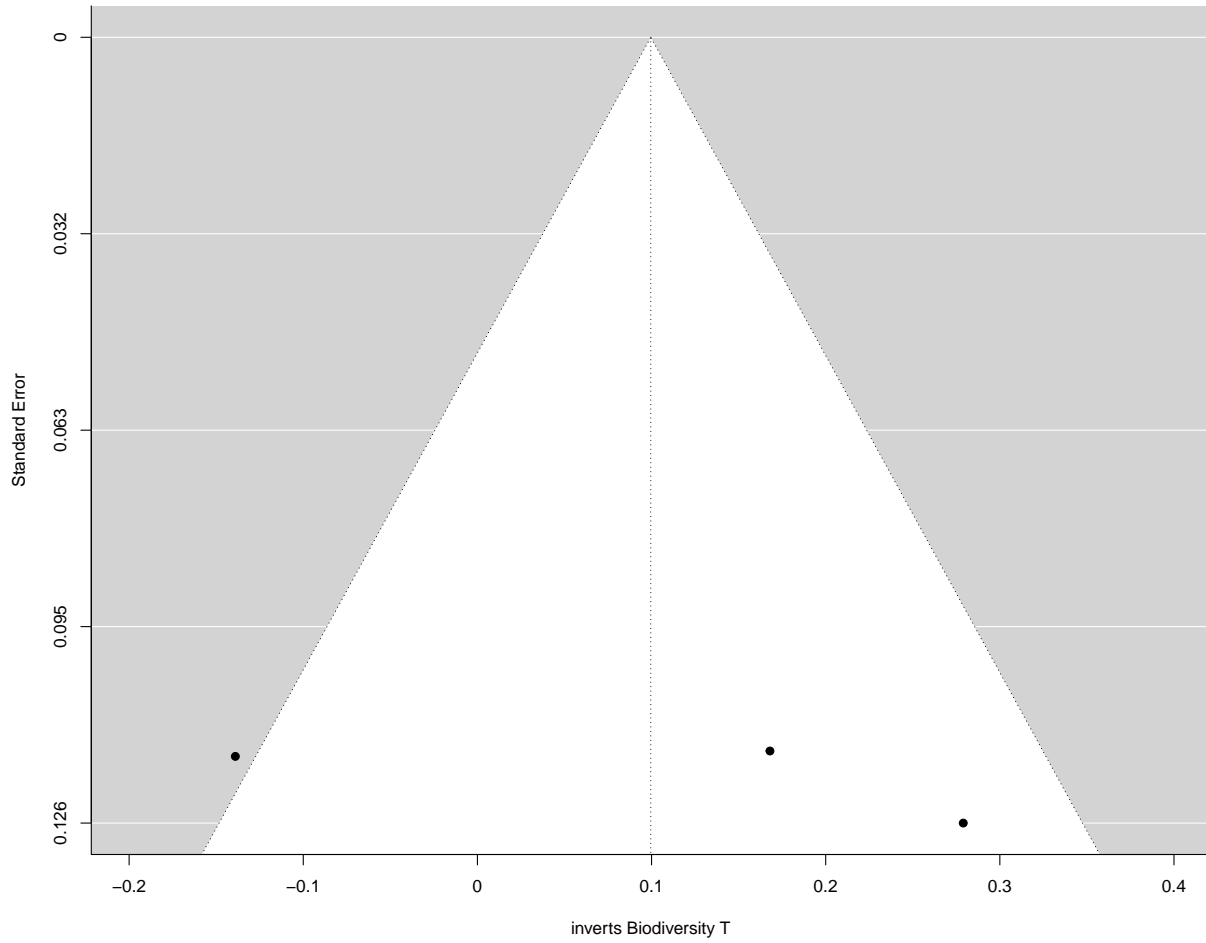

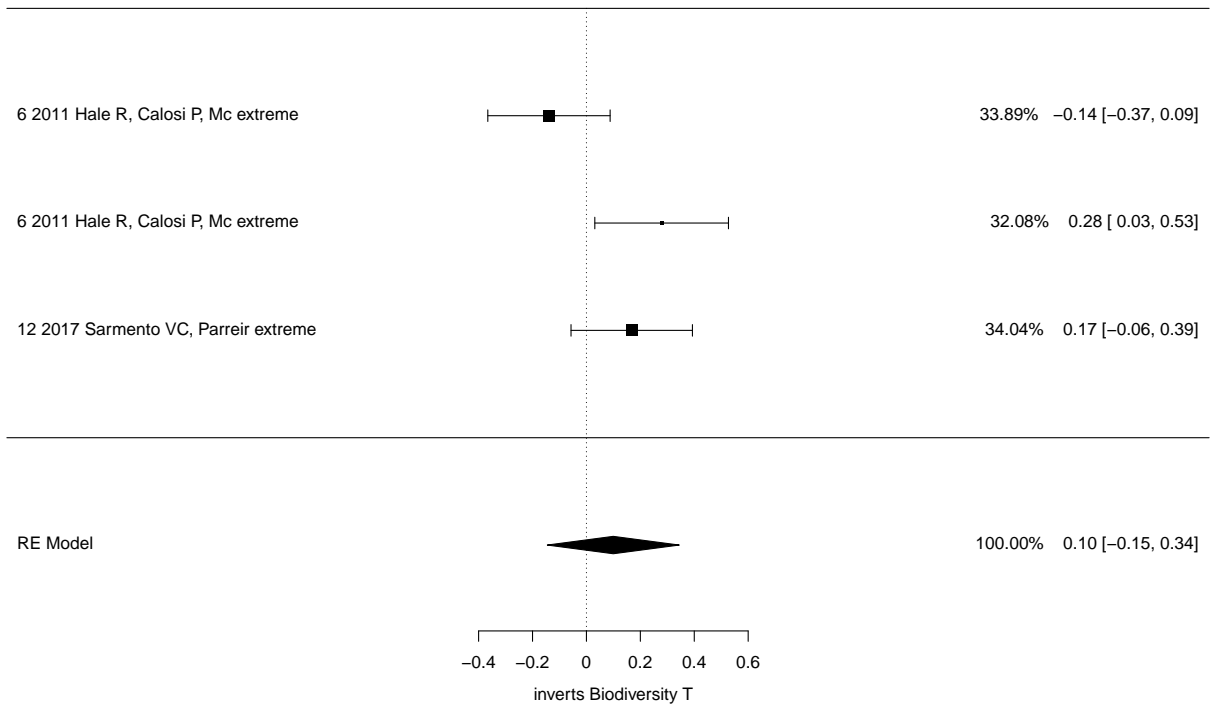

```
##
## Random-Effects Model (k = 9; tau^2 estimator: REML)
##
## tau^2 (estimated amount of total heterogeneity): 0.0377 (SE = 0.0314)
## tau (square root of estimated tau^2 value):      0.1943
## I^2 (total heterogeneity / total variability):   62.77%
## H^2 (total variability / sampling variability):   2.69
##
## Test for Heterogeneity:
## Q(df = 8) = 21.6547, p-val = 0.0056
##
## Model Results:
##
## estimate      se      zval      pval      ci.lb      ci.ub
## -0.0733  0.0848  -0.8643  0.3874  -0.2395  0.0929
##
## ---
## Signif. codes:  0 '***' 0.001 '**' 0.01 '*' 0.05 '.' 0.1 ' ' 1
```

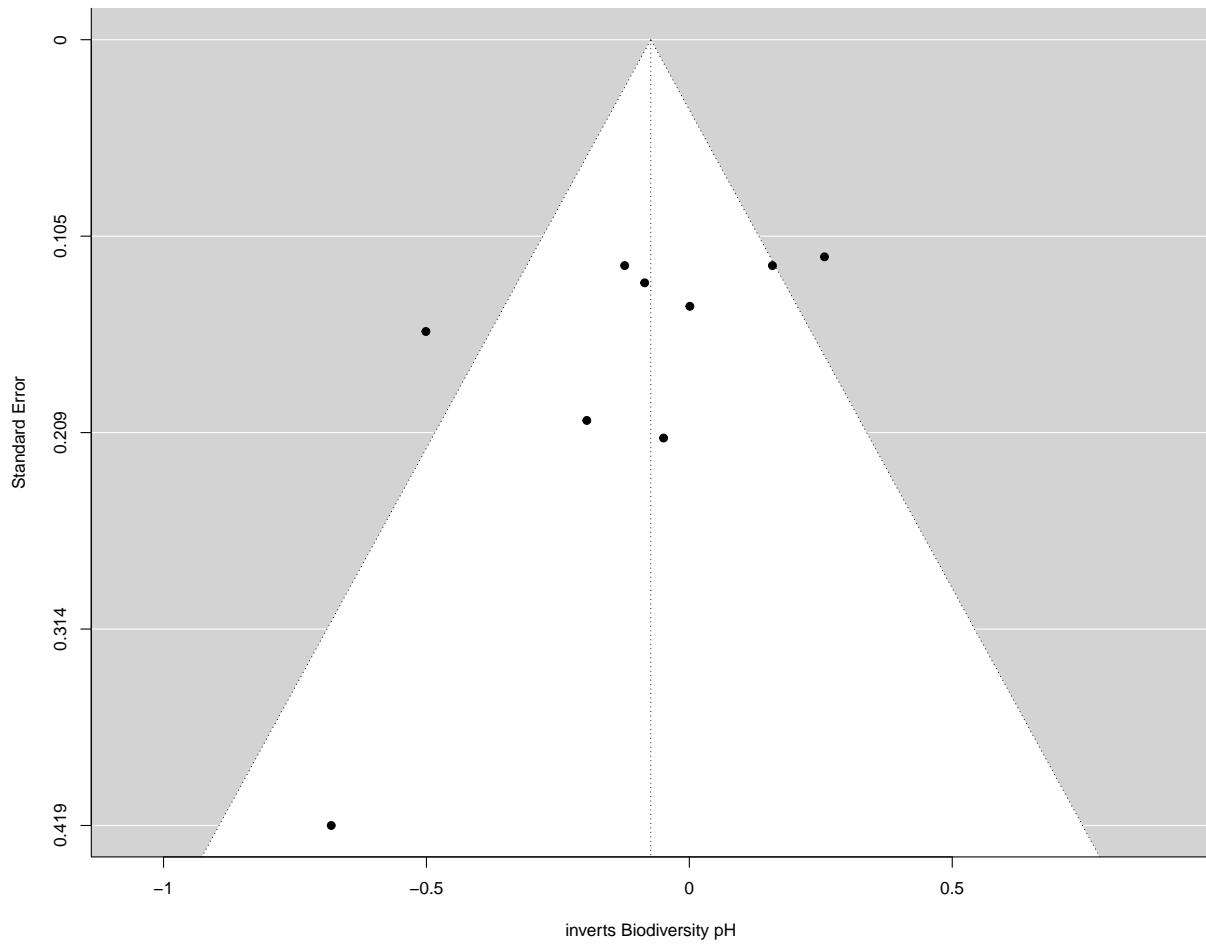

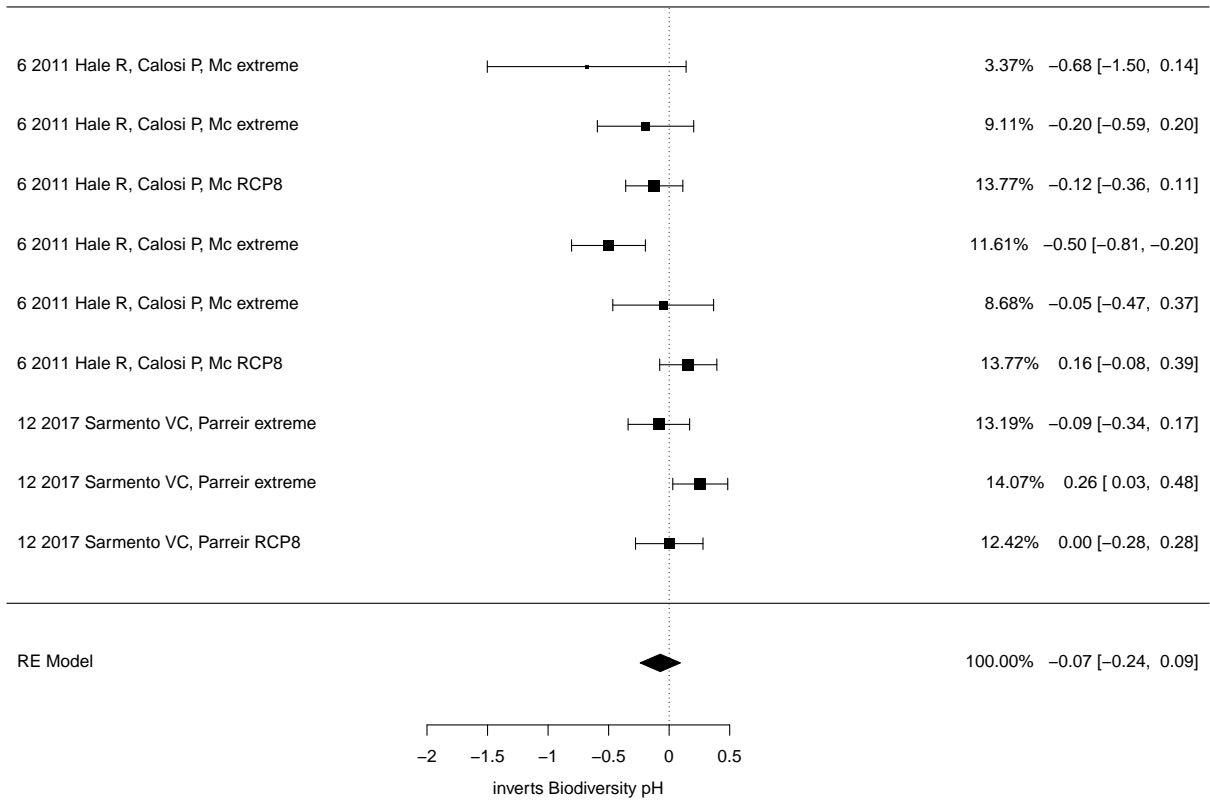

```

##
## Random-Effects Model (k = 9; tau^2 estimator: REML)
##
## tau^2 (estimated amount of total heterogeneity): 0.0876 (SE = 0.0541)
## tau (square root of estimated tau^2 value):      0.2961
## I^2 (total heterogeneity / total variability):   84.00%
## H^2 (total variability / sampling variability):   6.25
##
## Test for Heterogeneity:
## Q(df = 8) = 66.7796, p-val < .0001
##
## Model Results:
##
## estimate      se      zval      pval      ci.lb      ci.ub
## -0.1220  0.1099  -1.1097  0.2671  -0.3374  0.0934
##
## ---
## Signif. codes:  0 '***' 0.001 '**' 0.01 '*' 0.05 '.' 0.1 ' ' 1

```

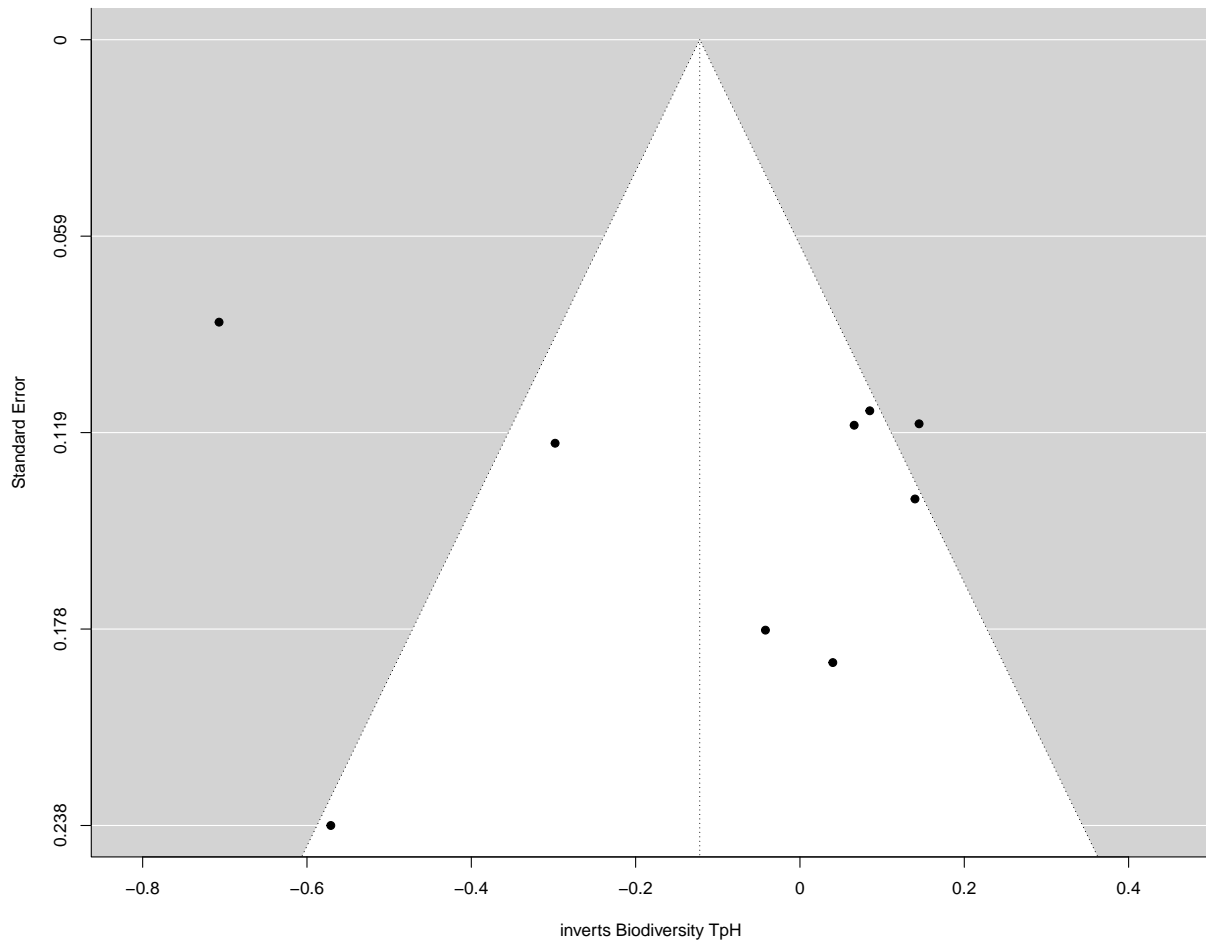

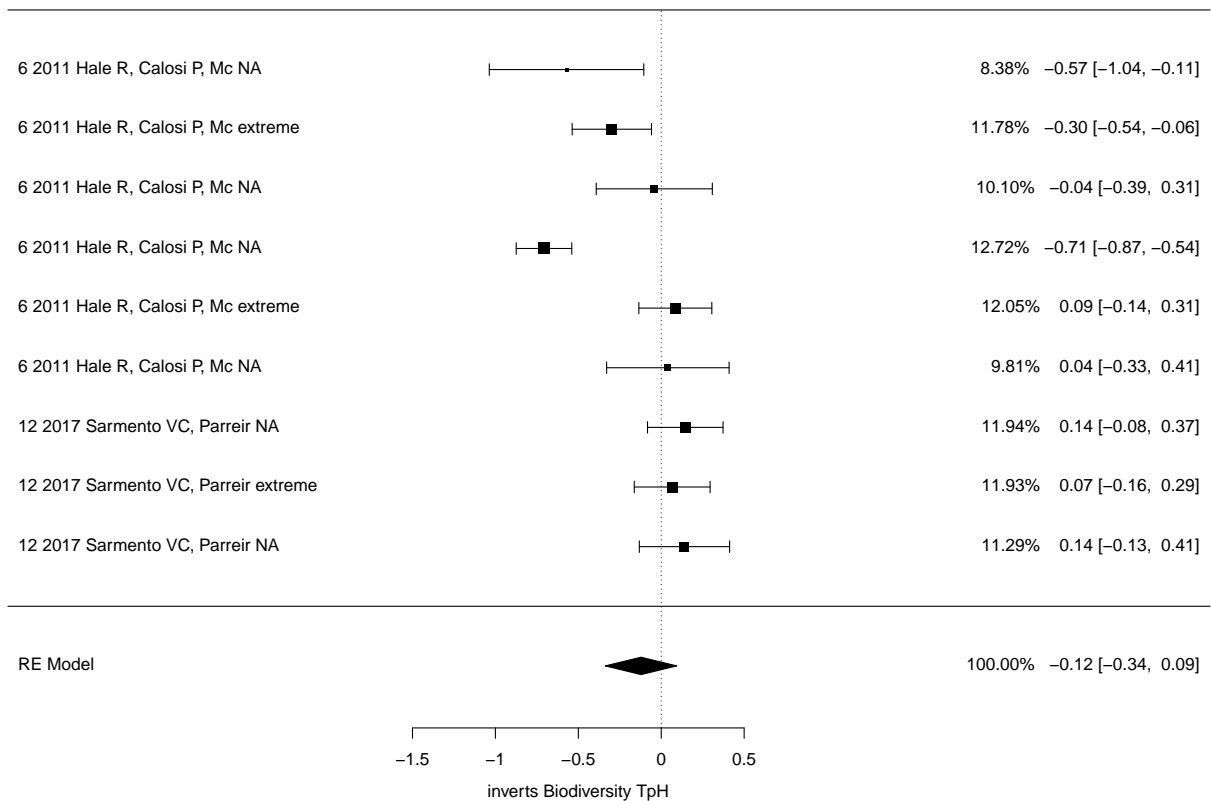

```
Abs_InvertBiodiv <- MA_TpH_abs("inverts","Biodiversity", Inverts)
```

```
## Invertebrate, Survival
```

```
InvertSurvi <- MA_TpH("inverts","Survival", Inverts,sensitivity)
```

```
##
## Random-Effects Model (k = 64; tau^2 estimator: REML)
##
## tau^2 (estimated amount of total heterogeneity): 0.1563 (SE = 0.0362)
## tau (square root of estimated tau^2 value):      0.3954
## I^2 (total heterogeneity / total variability):    99.22%
## H^2 (total variability / sampling variability):   128.45
##
## Test for Heterogeneity:
## Q(df = 63) = 605.9582, p-val < .0001
##
## Model Results:
##
## estimate      se      zval      pval      ci.lb      ci.ub
## -0.0956      0.0591     -1.6185     0.1056     -0.2115     0.0202
```

```
##
## ---
## Signif. codes:  0 '***' 0.001 '**' 0.01 '*' 0.05 '.' 0.1 ' ' 1
```

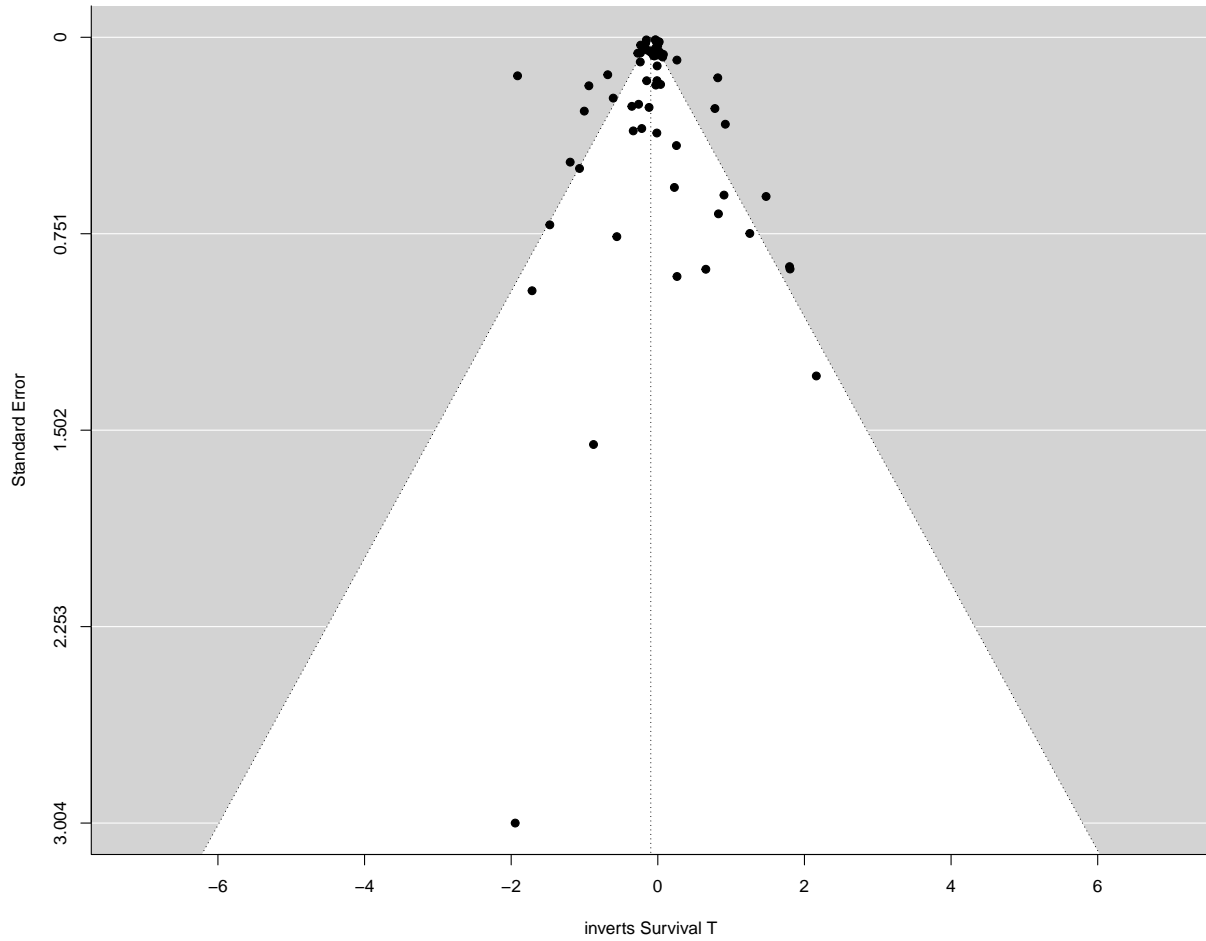

```
## Warning in text.default(...): conversion failure on '40 2018 Parker LM, O'Connor
## extreme' in 'mbscsToSbcs': dot substituted for <e2>
```

```
## Warning in text.default(...): conversion failure on '40 2018 Parker LM, O'Connor
## extreme' in 'mbscsToSbcs': dot substituted for <80>
```

```
## Warning in text.default(...): conversion failure on '40 2018 Parker LM, O'Connor
## extreme' in 'mbscsToSbcs': dot substituted for <99>
```

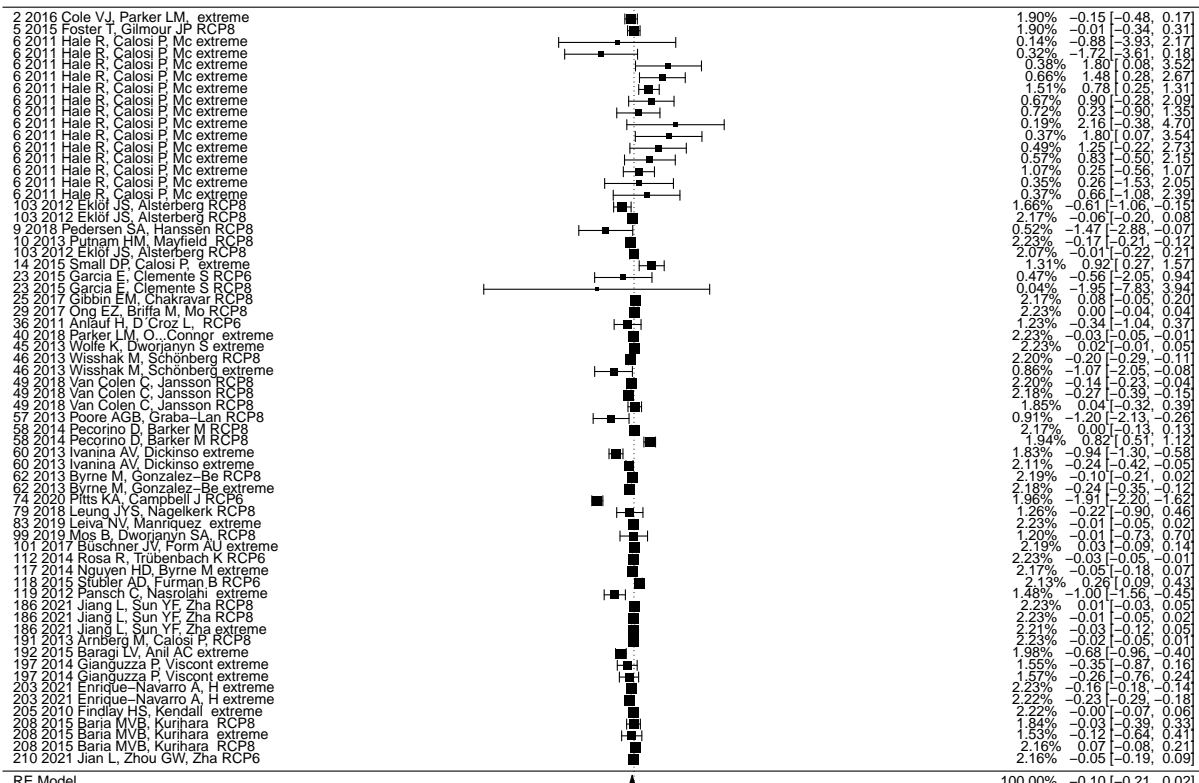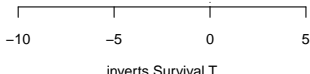

```

##
## Random-Effects Model (k = 110; tau^2 estimator: REML)
##
## tau^2 (estimated amount of total heterogeneity): 0.1066 (SE = 0.0195)
## tau (square root of estimated tau^2 value):      0.3265
## I^2 (total heterogeneity / total variability):   98.91%
## H^2 (total variability / sampling variability):  91.50
##
## Test for Heterogeneity:
## Q(df = 109) = 7212.3271, p-val < .0001
##
## Model Results:
##
## estimate      se      zval      pval      ci.lb      ci.ub
## -0.1805  0.0382  -4.7256  <.0001  -0.2553  -0.1056  ***
##
## ---
## Signif. codes:  0 '***' 0.001 '**' 0.01 '*' 0.05 '.' 0.1 ' ' 1

```

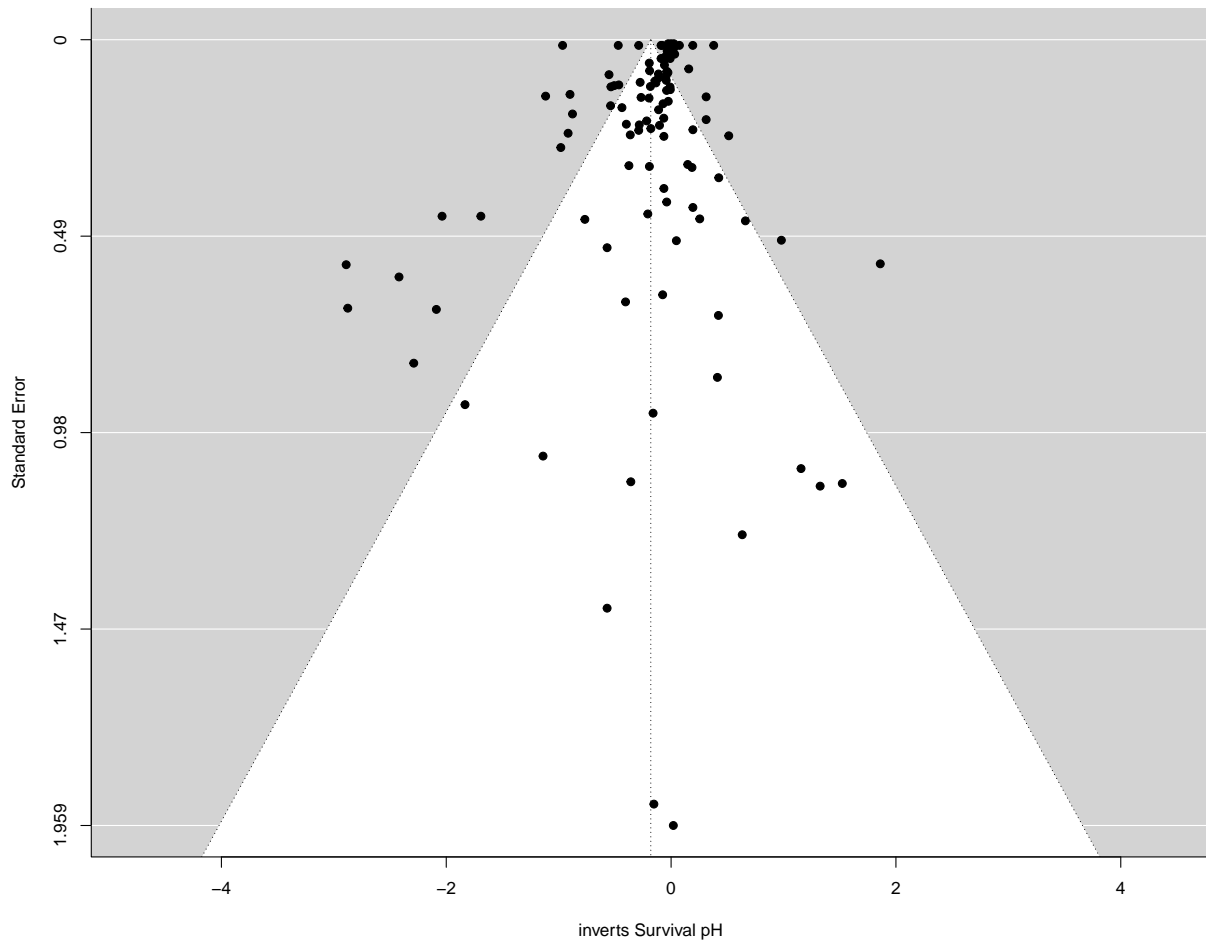

```
## Warning in text.default(...): conversion failure on '40 2018 Parker LM, O'Connor
## RCP8' in 'mbscsToSbcs': dot substituted for <e2>
```

```
## Warning in text.default(...): conversion failure on '40 2018 Parker LM, O'Connor
## RCP8' in 'mbscsToSbcs': dot substituted for <80>
```

```
## Warning in text.default(...): conversion failure on '40 2018 Parker LM, O'Connor
## RCP8' in 'mbscsToSbcs': dot substituted for <99>
```

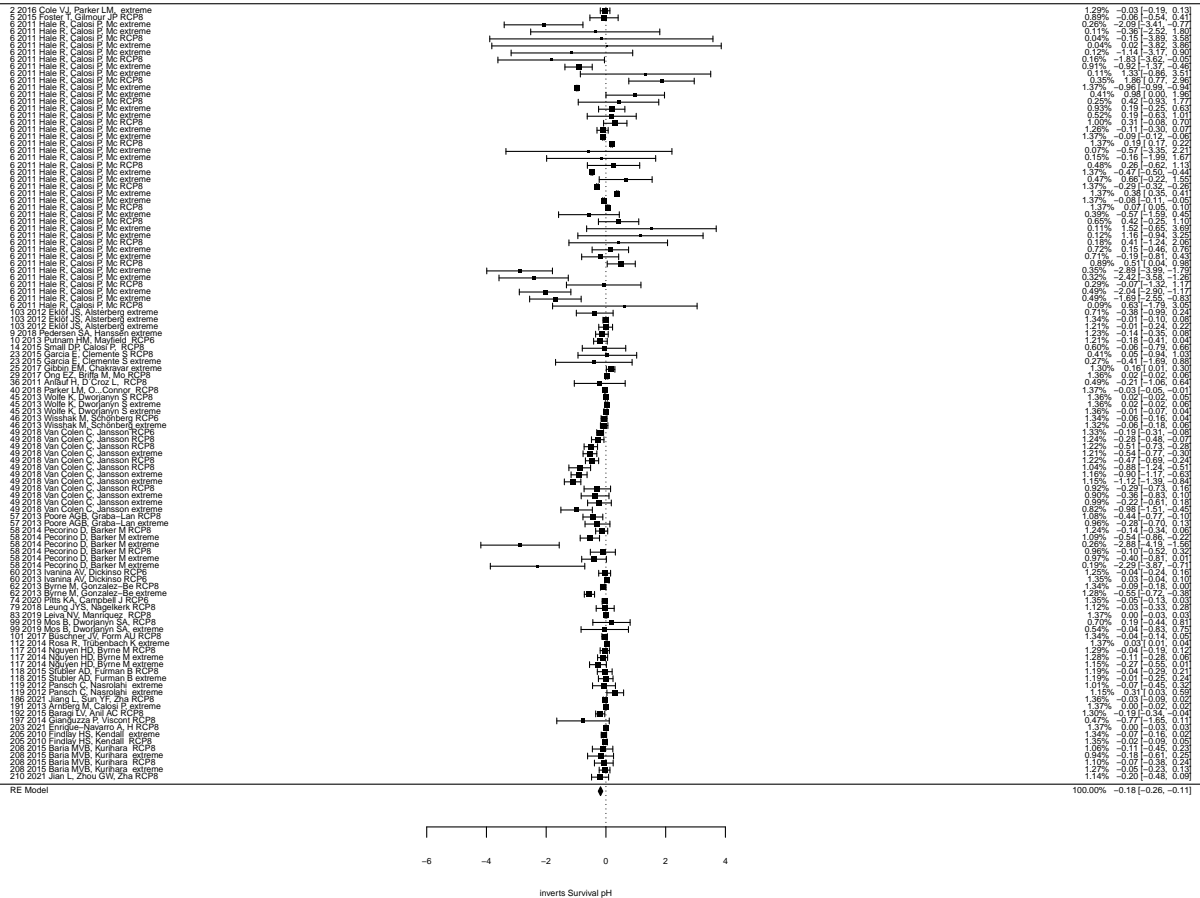

```

##
## Random-Effects Model (k = 120; tau^2 estimator: REML)
##
## tau^2 (estimated amount of total heterogeneity): 0.3052 (SE = 0.0497)
## tau (square root of estimated tau^2 value):      0.5524
## I^2 (total heterogeneity / total variability):   99.35%
## H^2 (total variability / sampling variability):  154.36
##
## Test for Heterogeneity:
## Q(df = 119) = 2513.0332, p-val < .0001
##
## Model Results:
##
## estimate      se      zval      pval      ci.lb      ci.ub
## -0.2570  0.0584  -4.4023  <.0001  -0.3714  -0.1426  ***
##
## ---
## Signif. codes:  0 '***' 0.001 '**' 0.01 '*' 0.05 '.' 0.1 ' ' 1

```

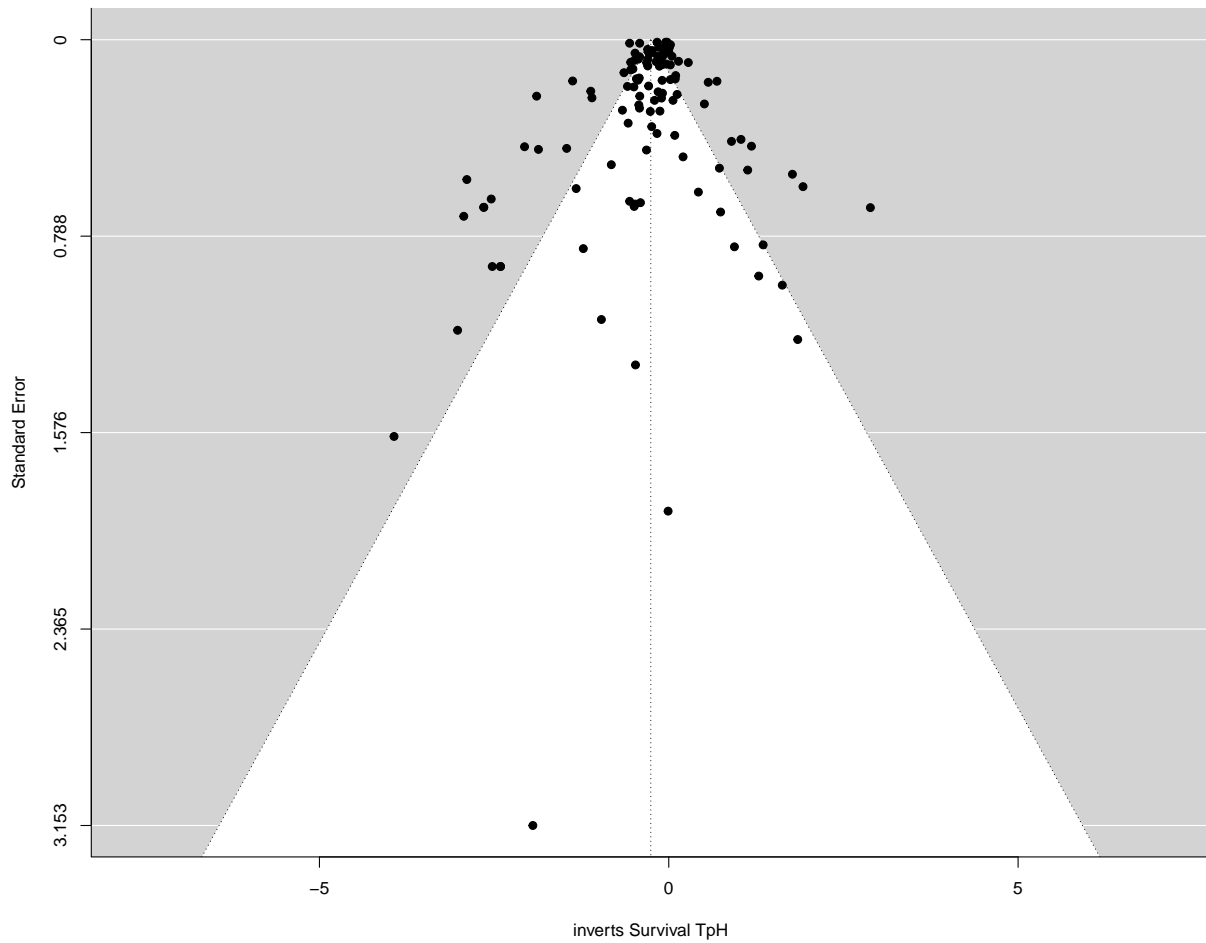

```
## Warning in text.default(...): conversion failure on '40 2018 Parker LM, O'Connor
## NA' in 'mbscsToSbcs': dot substituted for <e2>
```

```
## Warning in text.default(...): conversion failure on '40 2018 Parker LM, O'Connor
## NA' in 'mbscsToSbcs': dot substituted for <80>
```

```
## Warning in text.default(...): conversion failure on '40 2018 Parker LM, O'Connor
## NA' in 'mbscsToSbcs': dot substituted for <99>
```

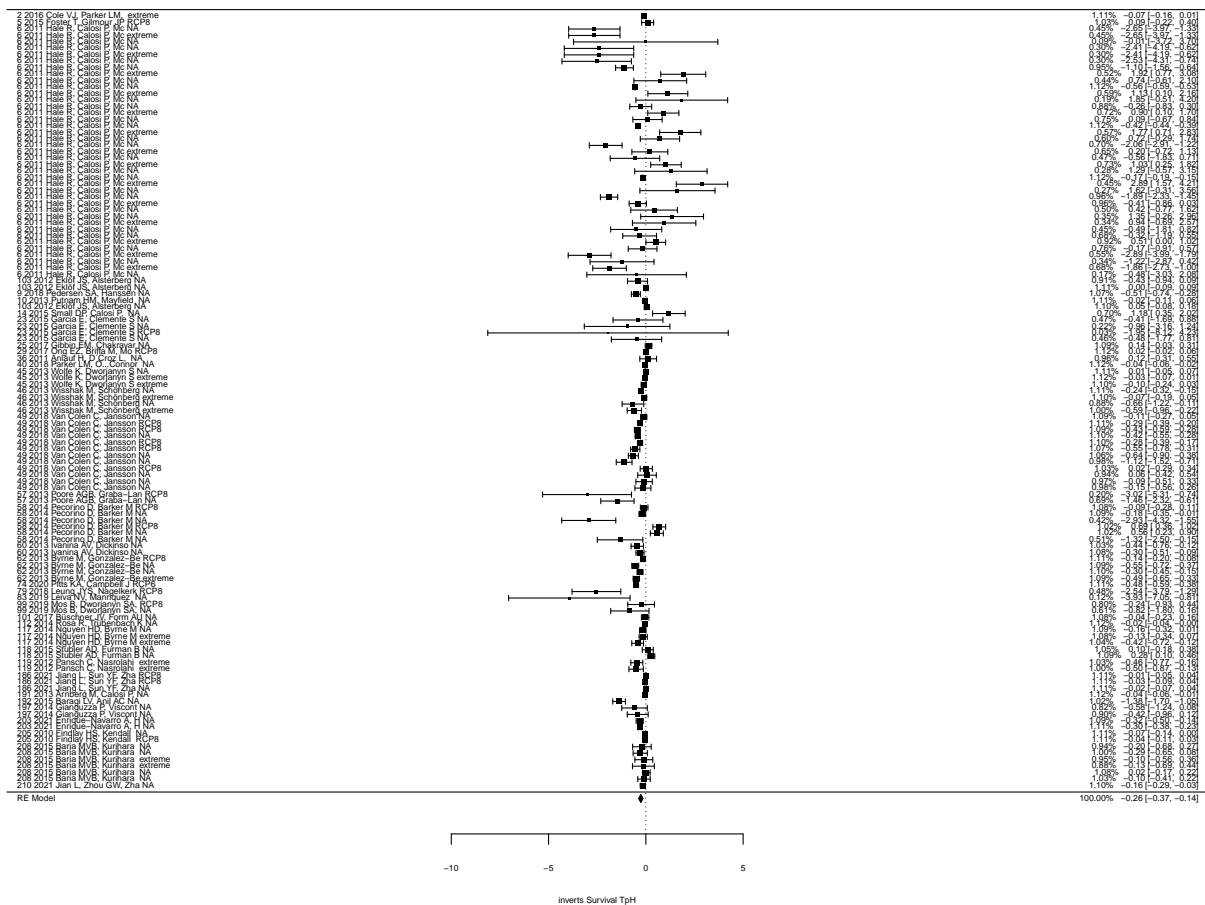

```
Abs_InvertSurvi <- MA_TpH_abs("inverts","Survival", Inverts)
```

```
## Fish, Survival
```

```
FishSurvi <- MA_TpH("fish","Survival", Fish,sensitivity)
```

```
##
## Random-Effects Model (k = 30; tau^2 estimator: REML)
##
## tau^2 (estimated amount of total heterogeneity): 0.2427 (SE = 0.0712)
## tau (square root of estimated tau^2 value): 0.4927
## I^2 (total heterogeneity / total variability): 99.78%
## H^2 (total variability / sampling variability): 464.80
##
## Test for Heterogeneity:
## Q(df = 29) = 1320.9327, p-val < .0001
##
## Model Results:
##
## estimate se zval pval ci.lb ci.ub
## -0.2678 0.0958 -2.7945 0.0052 -0.4556 -0.0800 **
```

```
##
## ---
## Signif. codes:  0 '***' 0.001 '**' 0.01 '*' 0.05 '.' 0.1 ' ' 1
```

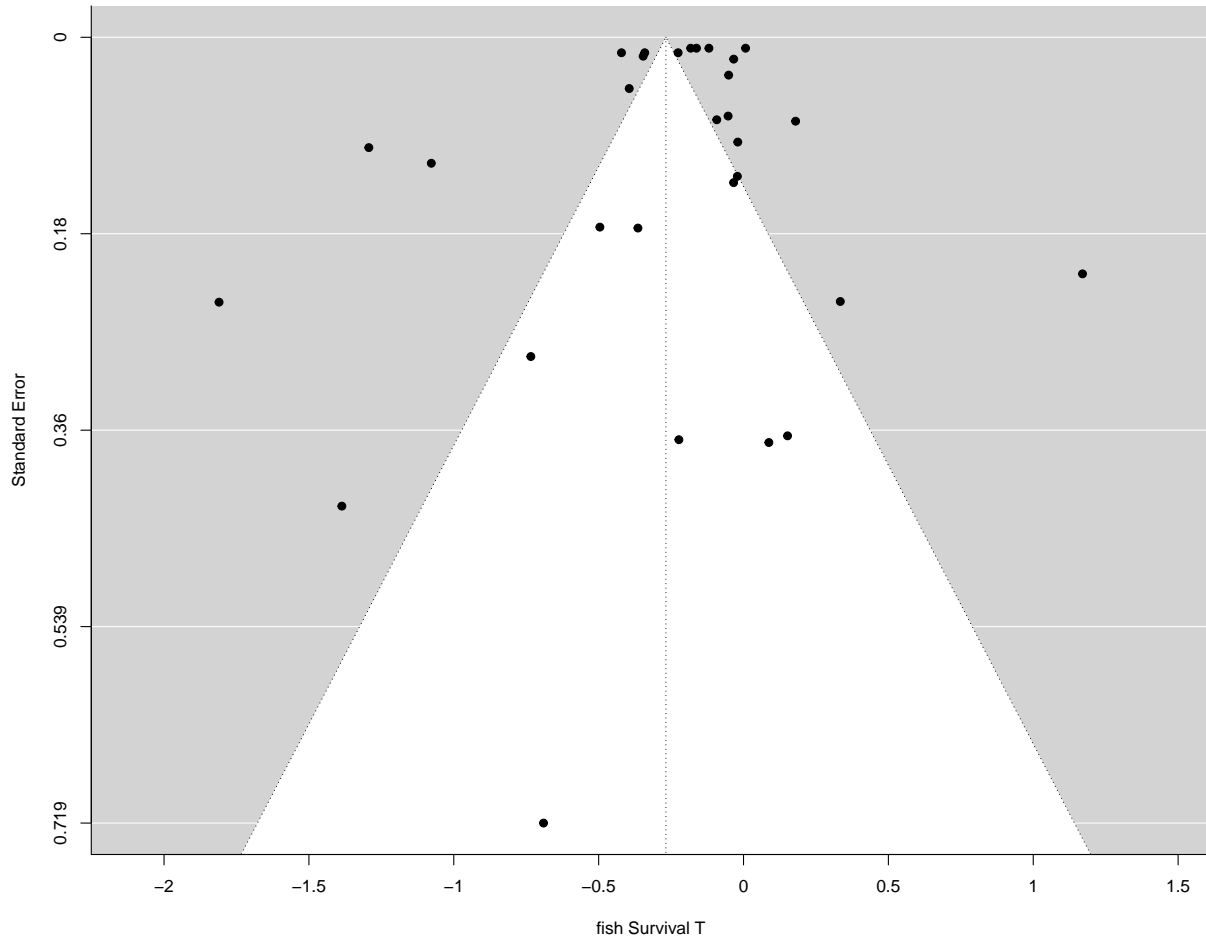

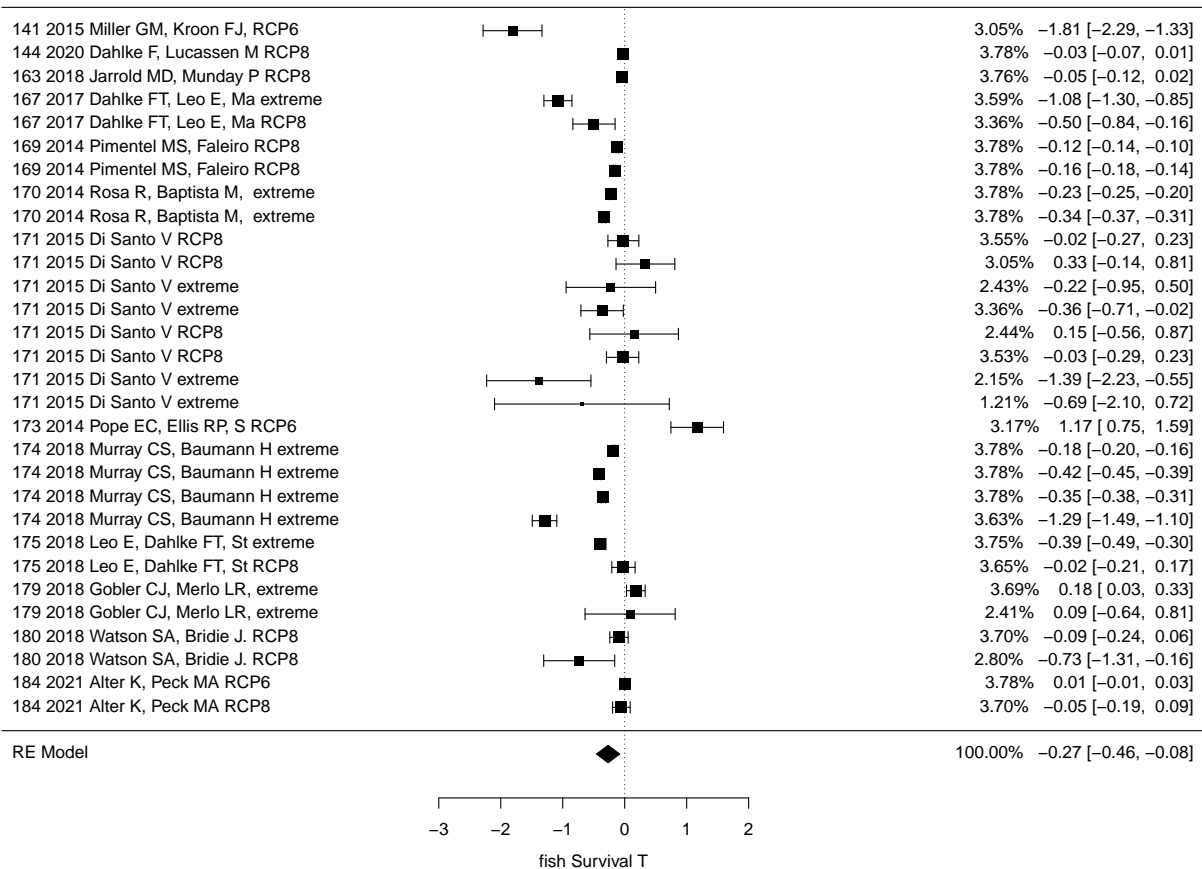

```

##
## Random-Effects Model (k = 24; tau^2 estimator: REML)
##
## tau^2 (estimated amount of total heterogeneity): 0.0279 (SE = 0.0104)
## tau (square root of estimated tau^2 value):      0.1671
## I^2 (total heterogeneity / total variability):   98.60%
## H^2 (total variability / sampling variability):  71.51
##
## Test for Heterogeneity:
## Q(df = 23) = 897.8871, p-val < .0001
##
## Model Results:
##
## estimate      se      zval      pval      ci.lb      ci.ub
## -0.0678  0.0398  -1.7028  0.0886  -0.1459  0.0102
##
## ---
## Signif. codes:  0 '***' 0.001 '**' 0.01 '*' 0.05 '.' 0.1 ' ' 1

```

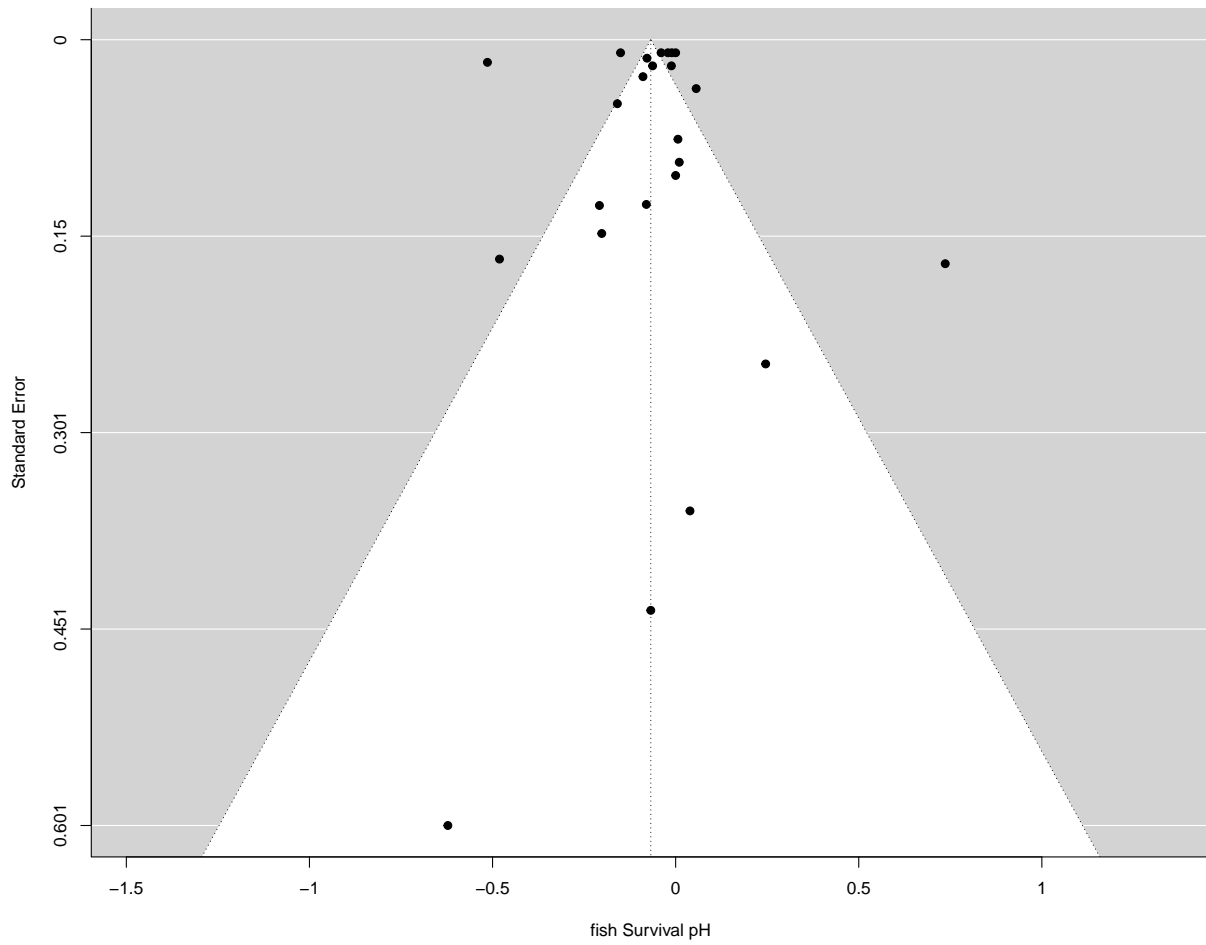

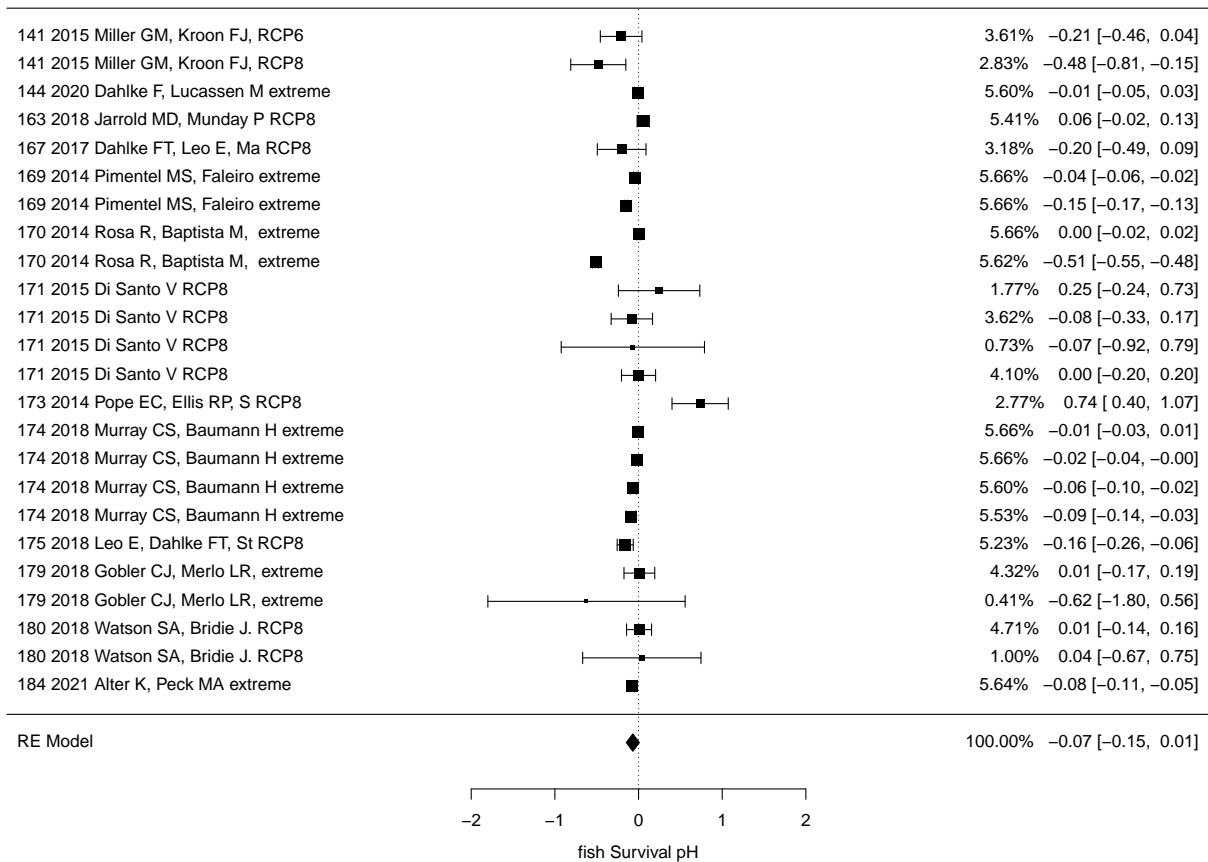

```

##
## Random-Effects Model (k = 34; tau^2 estimator: REML)
##
## tau^2 (estimated amount of total heterogeneity): 0.3813 (SE = 0.1018)
## tau (square root of estimated tau^2 value):      0.6175
## I^2 (total heterogeneity / total variability):   99.87%
## H^2 (total variability / sampling variability):  780.74
##
## Test for Heterogeneity:
## Q(df = 33) = 3324.9838, p-val < .0001
##
## Model Results:
##
## estimate      se      zval      pval      ci.lb      ci.ub
## -0.4120  0.1108  -3.7178  0.0002  -0.6291  -0.1948  ***
##
## ---
## Signif. codes:  0 '***' 0.001 '**' 0.01 '*' 0.05 '.' 0.1 ' ' 1

```

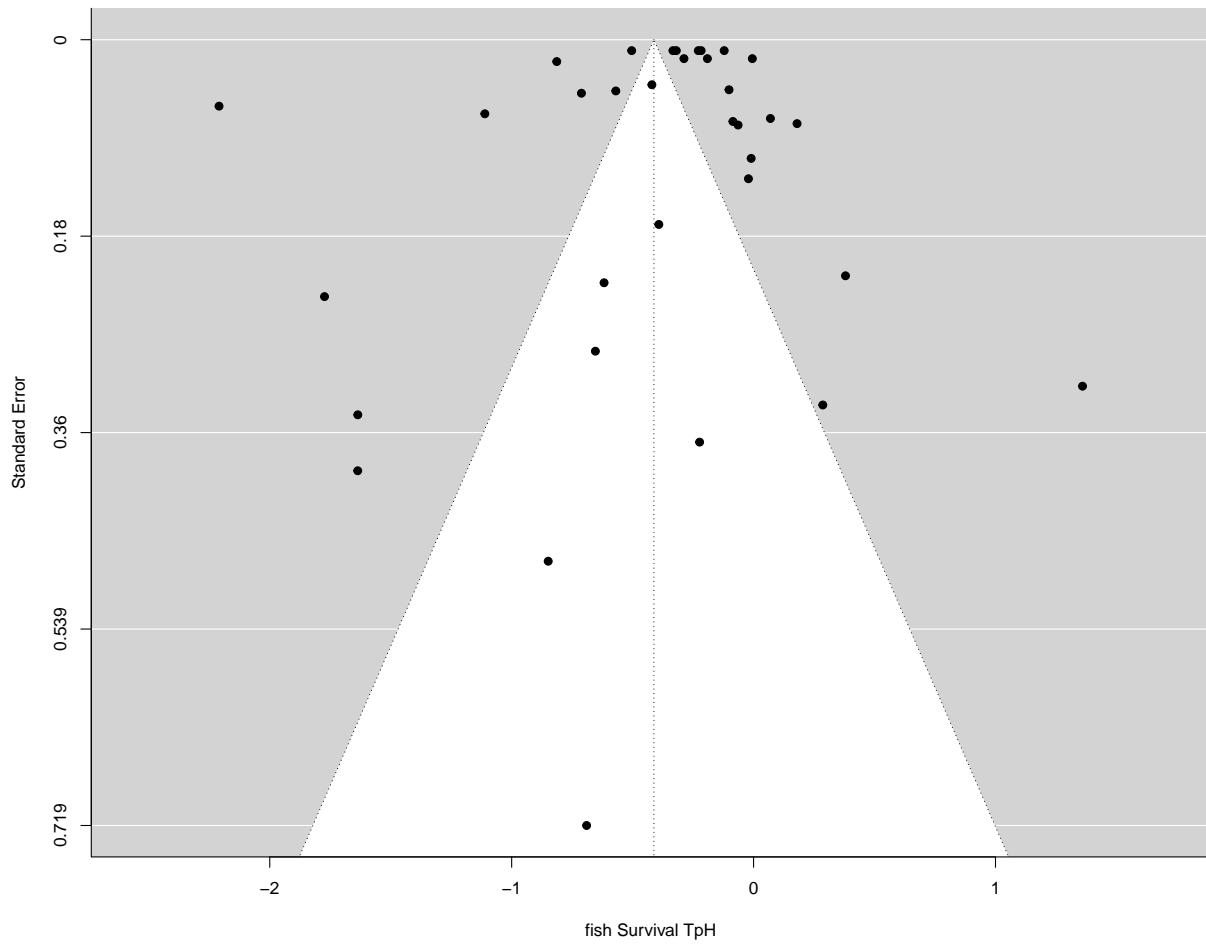

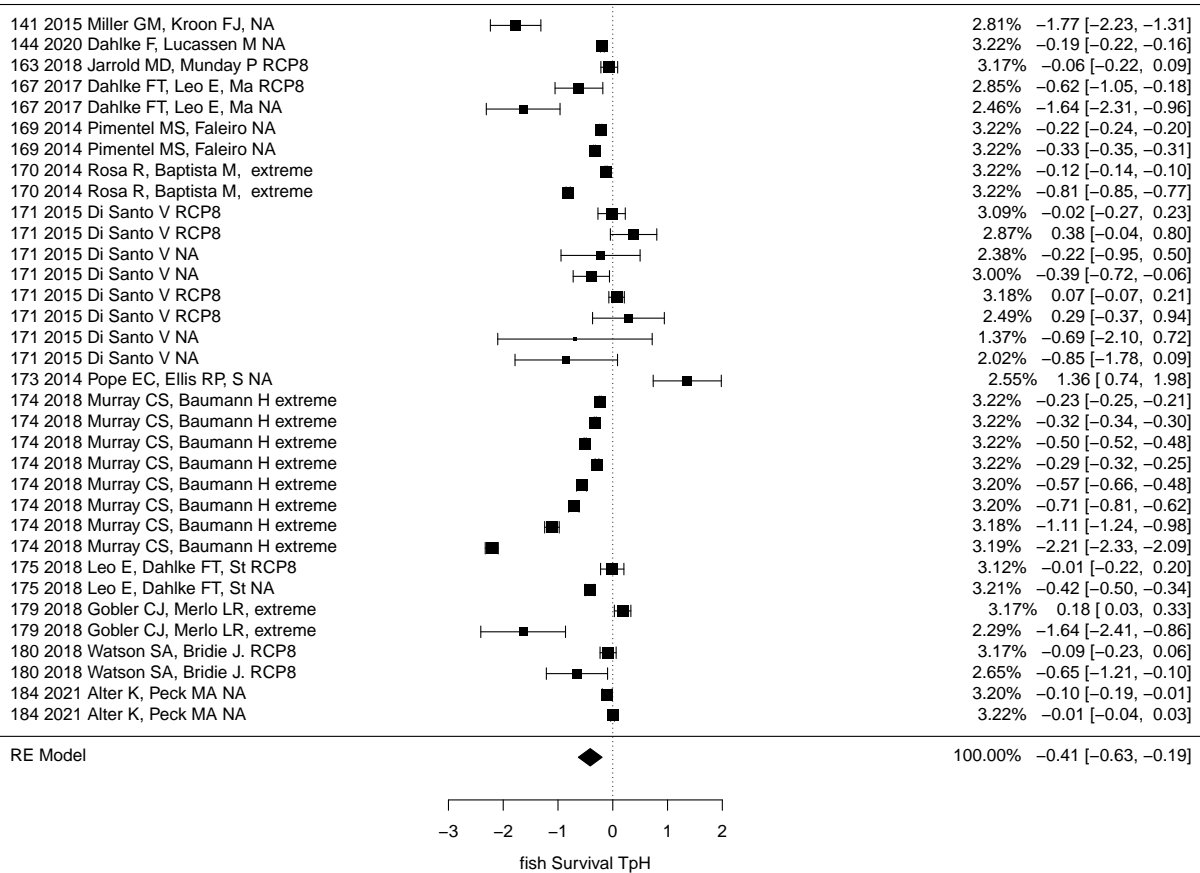

```

Abs_FishSurvi <- MA_TpH_abs("fish", "Survival", Fish)

## Invertebrate, Reproduction
InvertRepro <- MA_TpH("inverts", "Reproduction", Inverts, sensitivity)

##
## Random-Effects Model (k = 52; tau^2 estimator: REML)
##
## tau^2 (estimated amount of total heterogeneity): 0.0766 (SE = 0.0175)
## tau (square root of estimated tau^2 value): 0.2768
## I^2 (total heterogeneity / total variability): 99.05%
## H^2 (total variability / sampling variability): 104.78
##
## Test for Heterogeneity:
## Q(df = 51) = 460.5345, p-val < .0001
##
## Model Results:
##
## estimate se zval pval ci.lb ci.ub
## -0.0896 0.0423 -2.1214 0.0339 -0.1725 -0.0068 *

```

```
##
## ---
## Signif. codes:  0 '***' 0.001 '**' 0.01 '*' 0.05 '.' 0.1 ' ' 1
```

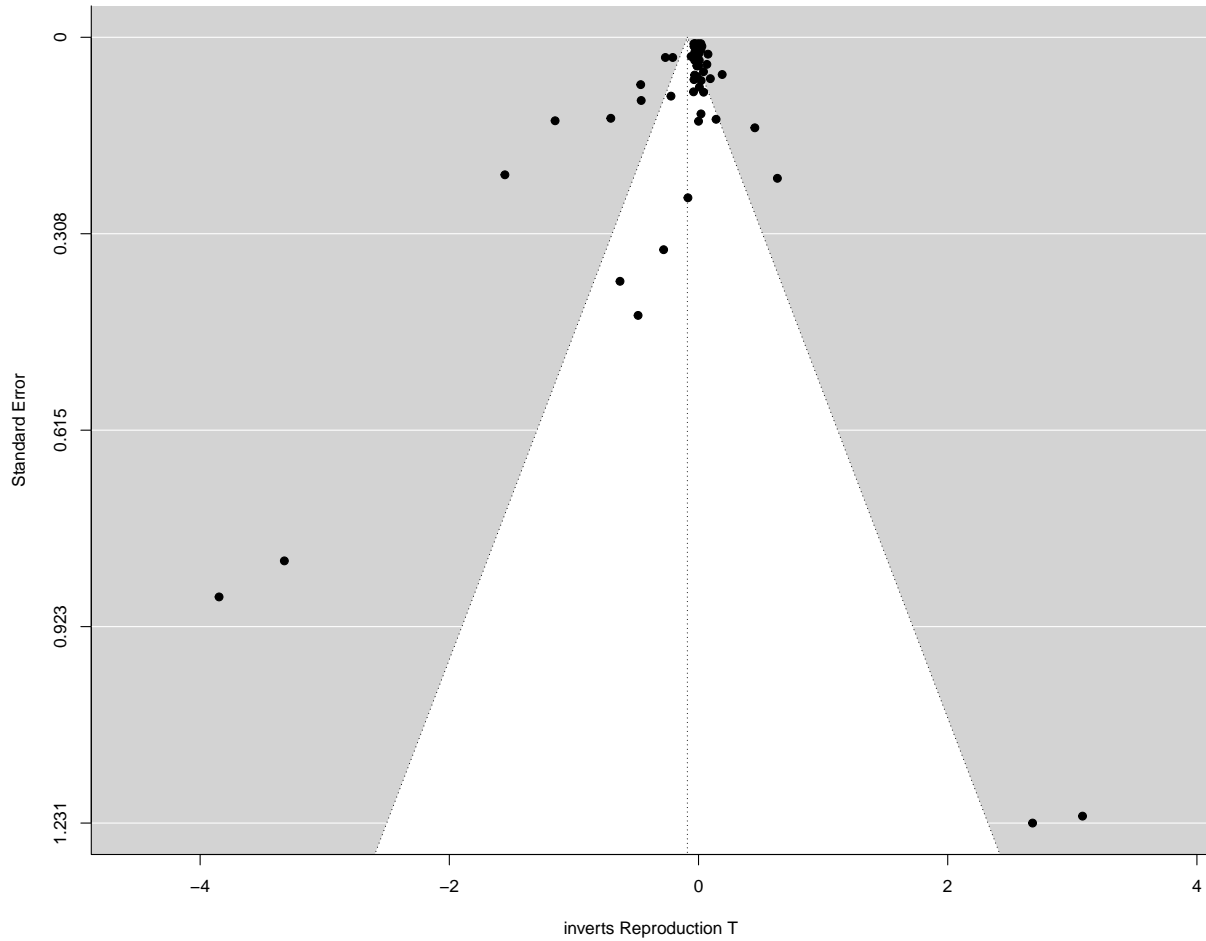

```
## Warning in text.default(...): conversion failure on '40 2018 Parker LM, O'Connor
## extreme' in 'mbscsToSbcs': dot substituted for <e2>
```

```
## Warning in text.default(...): conversion failure on '40 2018 Parker LM, O'Connor
## extreme' in 'mbscsToSbcs': dot substituted for <80>
```

```
## Warning in text.default(...): conversion failure on '40 2018 Parker LM, O'Connor
## extreme' in 'mbscsToSbcs': dot substituted for <99>
```

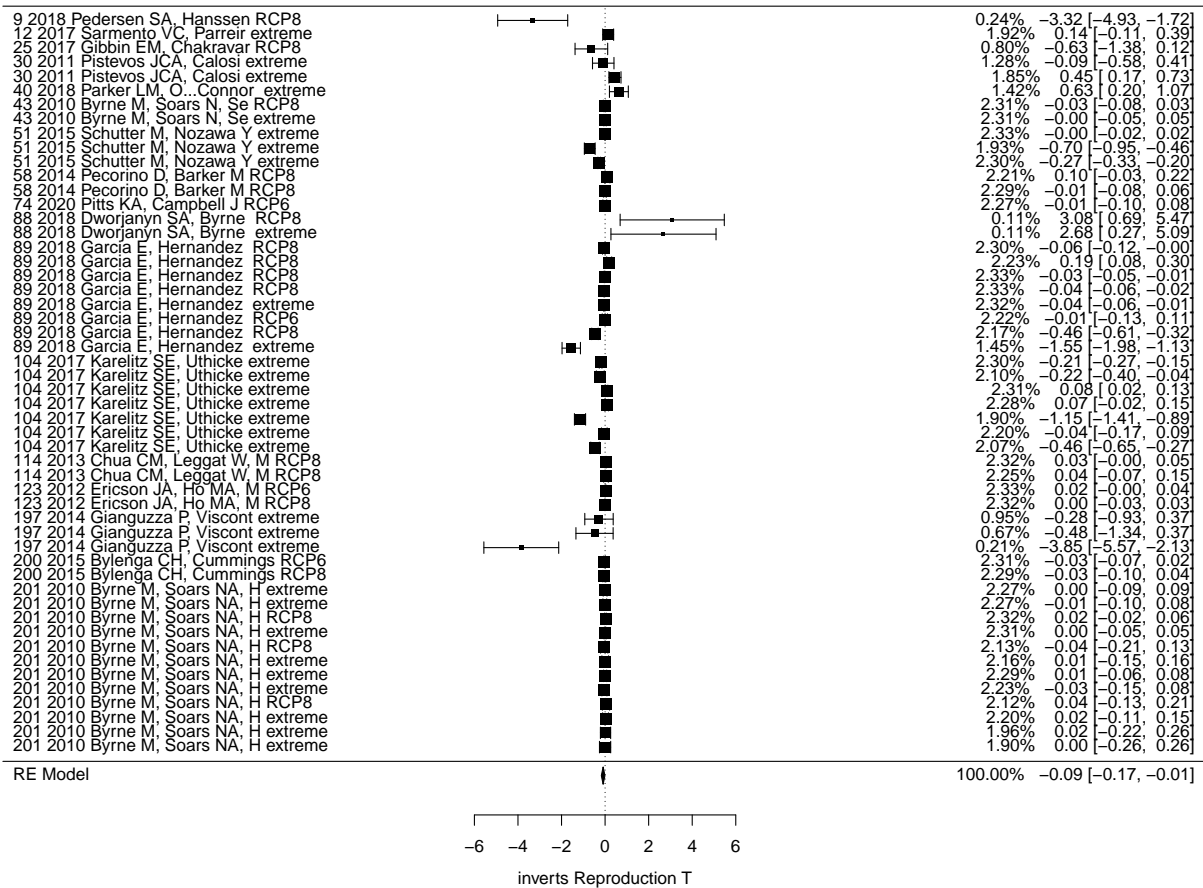

```

##
## Random-Effects Model (k = 55; tau^2 estimator: REML)
##
## tau^2 (estimated amount of total heterogeneity): 0.2011 (SE = 0.0414)
## tau (square root of estimated tau^2 value): 0.4485
## I^2 (total heterogeneity / total variability): 99.61%
## H^2 (total variability / sampling variability): 256.06
##
## Test for Heterogeneity:
## Q(df = 54) = 395.3632, p-val < .0001
##
## Model Results:
##
## estimate se zval pval ci.lb ci.ub
## -0.1321 0.0630 -2.0970 0.0360 -0.2555 -0.0086 *
##
## ---
## Signif. codes: 0 '***' 0.001 '**' 0.01 '*' 0.05 '.' 0.1 ' ' 1

```

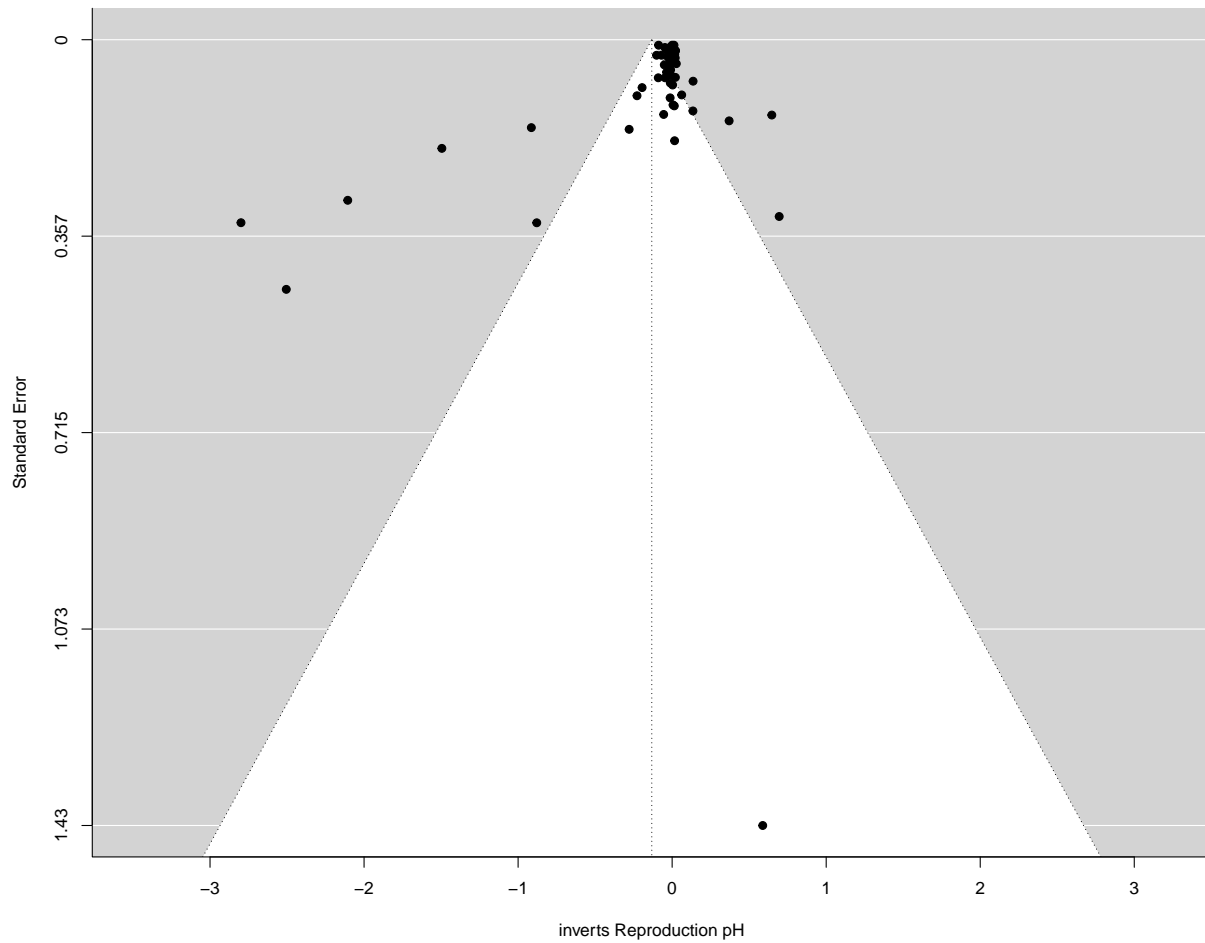

```
## Warning in text.default(...): conversion failure on '40 2018 Parker LM, O'Connor
## RCP8' in 'mbscsToSbcs': dot substituted for <e2>
```

```
## Warning in text.default(...): conversion failure on '40 2018 Parker LM, O'Connor
## RCP8' in 'mbscsToSbcs': dot substituted for <80>
```

```
## Warning in text.default(...): conversion failure on '40 2018 Parker LM, O'Connor
## RCP8' in 'mbscsToSbcs': dot substituted for <99>
```

```
## Warning in sqrt(varSr): NaNs produced
```

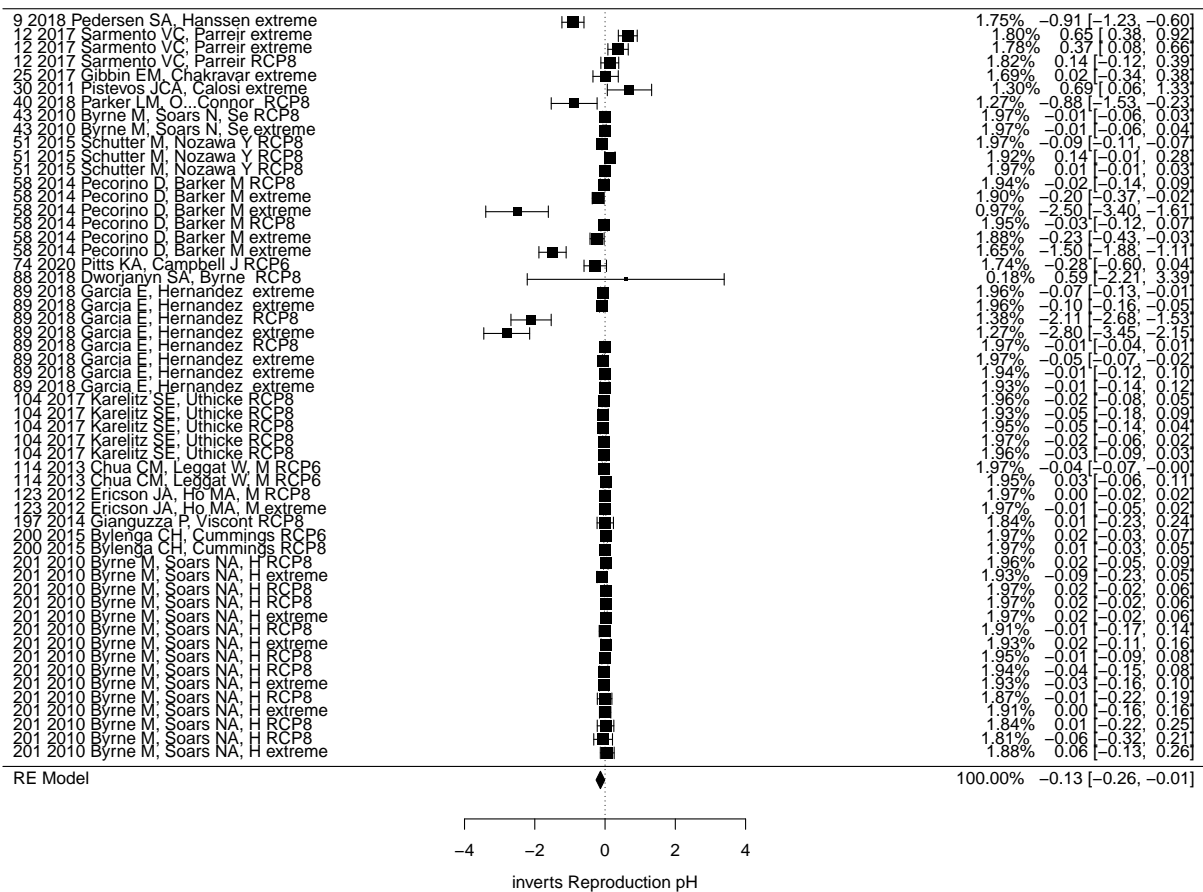

```

##
## Random-Effects Model (k = 92; tau^2 estimator: REML)
##
## tau^2 (estimated amount of total heterogeneity): 0.1688 (SE = 0.0277)
## tau (square root of estimated tau^2 value): 0.4109
## I^2 (total heterogeneity / total variability): 99.52%
## H^2 (total variability / sampling variability): 209.40
##
## Test for Heterogeneity:
## Q(df = 91) = 805.9601, p-val < .0001
##
## Model Results:
##
## estimate se zval pval ci.lb ci.ub
## -0.1648 0.0460 -3.5863 0.0003 -0.2549 -0.0748 ***
##
## ---
## Signif. codes: 0 '***' 0.001 '**' 0.01 '*' 0.05 '.' 0.1 ' ' 1

```

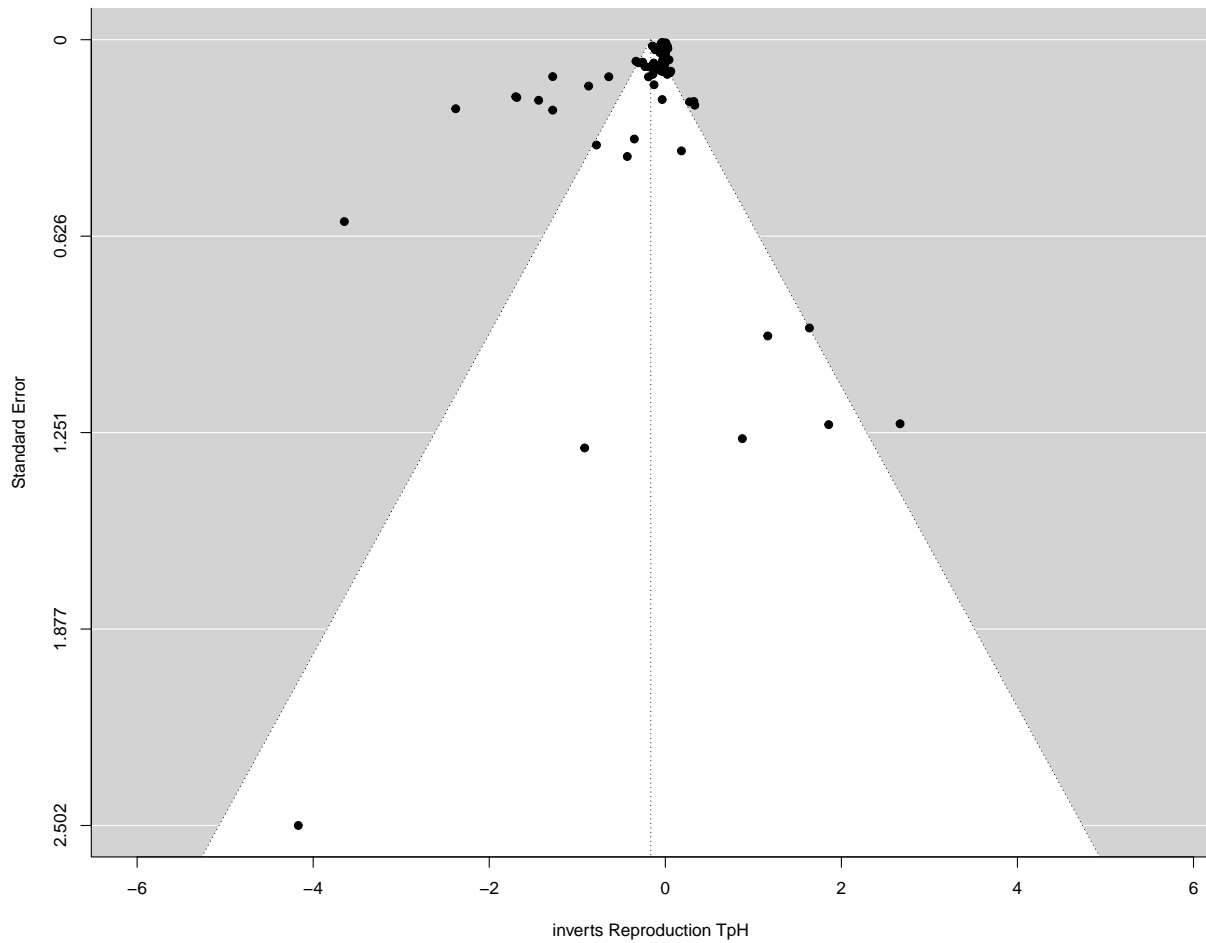

```
## Warning in text.default(...): conversion failure on '40 2018 Parker LM, O'Connor
## NA' in 'mbscsToSbcs': dot substituted for <e2>
```

```
## Warning in text.default(...): conversion failure on '40 2018 Parker LM, O'Connor
## NA' in 'mbscsToSbcs': dot substituted for <80>
```

```
## Warning in text.default(...): conversion failure on '40 2018 Parker LM, O'Connor
## NA' in 'mbscsToSbcs': dot substituted for <99>
```

```
## Warning in sqrt(varSr): NaNs produced
```

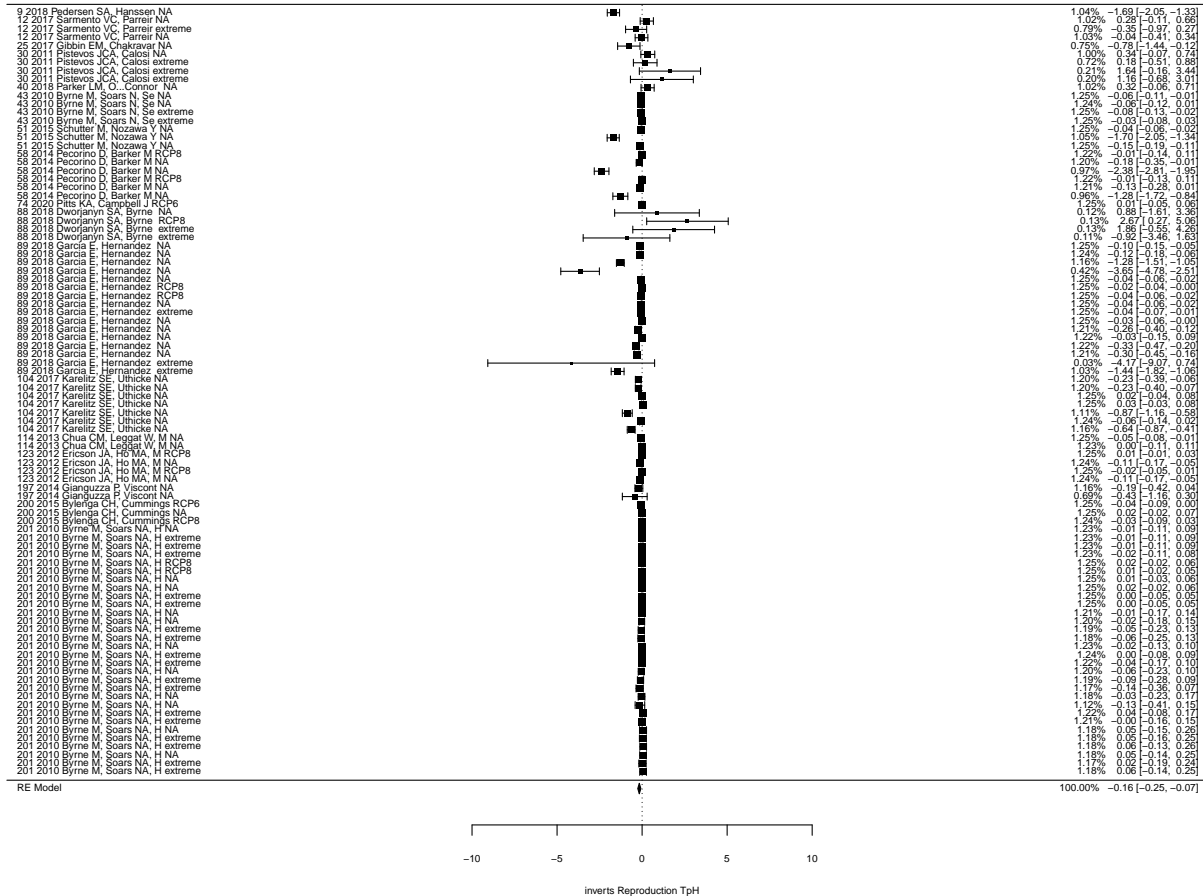

```
Abs_InvertRepro <- MA_TpH_abs("inverts","Reproduction", Inverts)
```

```
## Fish, Reproduction
```

```
FishRepro <- MA_TpH("fish","Reproduction", Fish,sensitivity)
```

```
##
## Random-Effects Model (k = 7; tau^2 estimator: REML)
##
## tau^2 (estimated amount of total heterogeneity): 0.1213 (SE = 0.0985)
## tau (square root of estimated tau^2 value): 0.3483
## I^2 (total heterogeneity / total variability): 95.23%
## H^2 (total variability / sampling variability): 20.94
##
## Test for Heterogeneity:
## Q(df = 6) = 68.5394, p-val < .0001
##
## Model Results:
##
## estimate se zval pval ci.lb ci.ub
## -0.3937 0.1620 -2.4310 0.0151 -0.7111 -0.0763 *
```

```
##  
## ---  
## Signif. codes:  0 '***' 0.001 '**' 0.01 '*' 0.05 '.' 0.1 ' ' 1
```

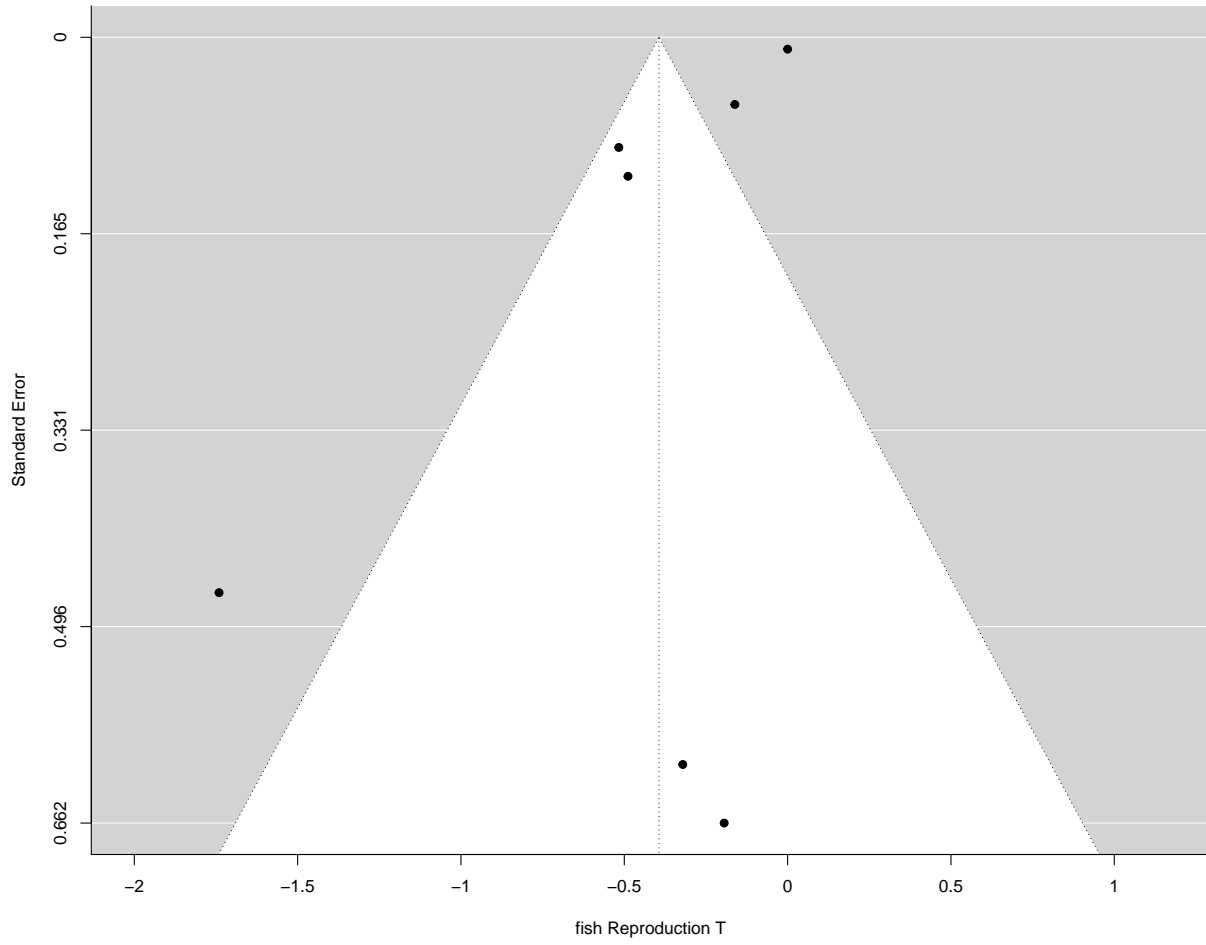

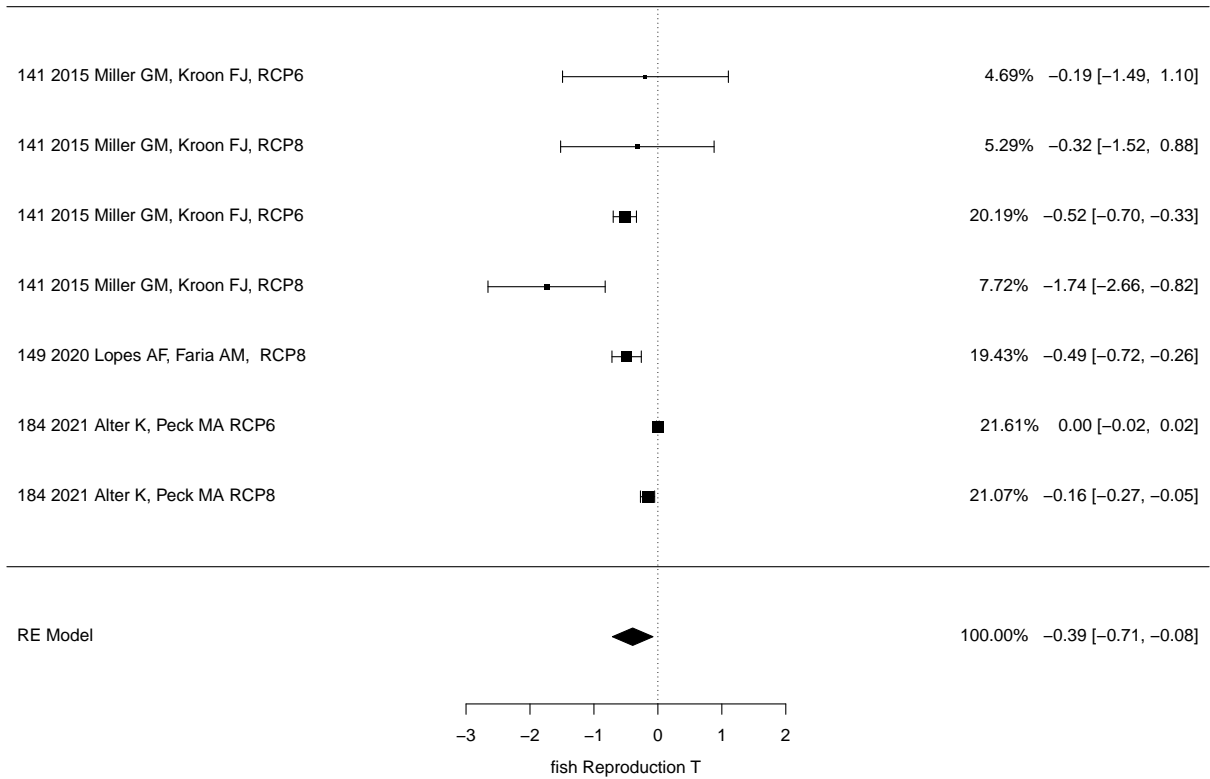

```

##
## Random-Effects Model (k = 6; tau^2 estimator: REML)
##
## tau^2 (estimated amount of total heterogeneity): 0.0937 (SE = 0.0767)
## tau (square root of estimated tau^2 value):      0.3061
## I^2 (total heterogeneity / total variability):   96.60%
## H^2 (total variability / sampling variability):  29.45
##
## Test for Heterogeneity:
## Q(df = 5) = 29.8652, p-val < .0001
##
## Model Results:
##
## estimate      se      zval      pval      ci.lb      ci.ub
## 0.0371 0.1465 0.2535 0.7999 -0.2500 0.3243
##
## ---
## Signif. codes:  0 '***' 0.001 '**' 0.01 '*' 0.05 '.' 0.1 ' ' 1

```

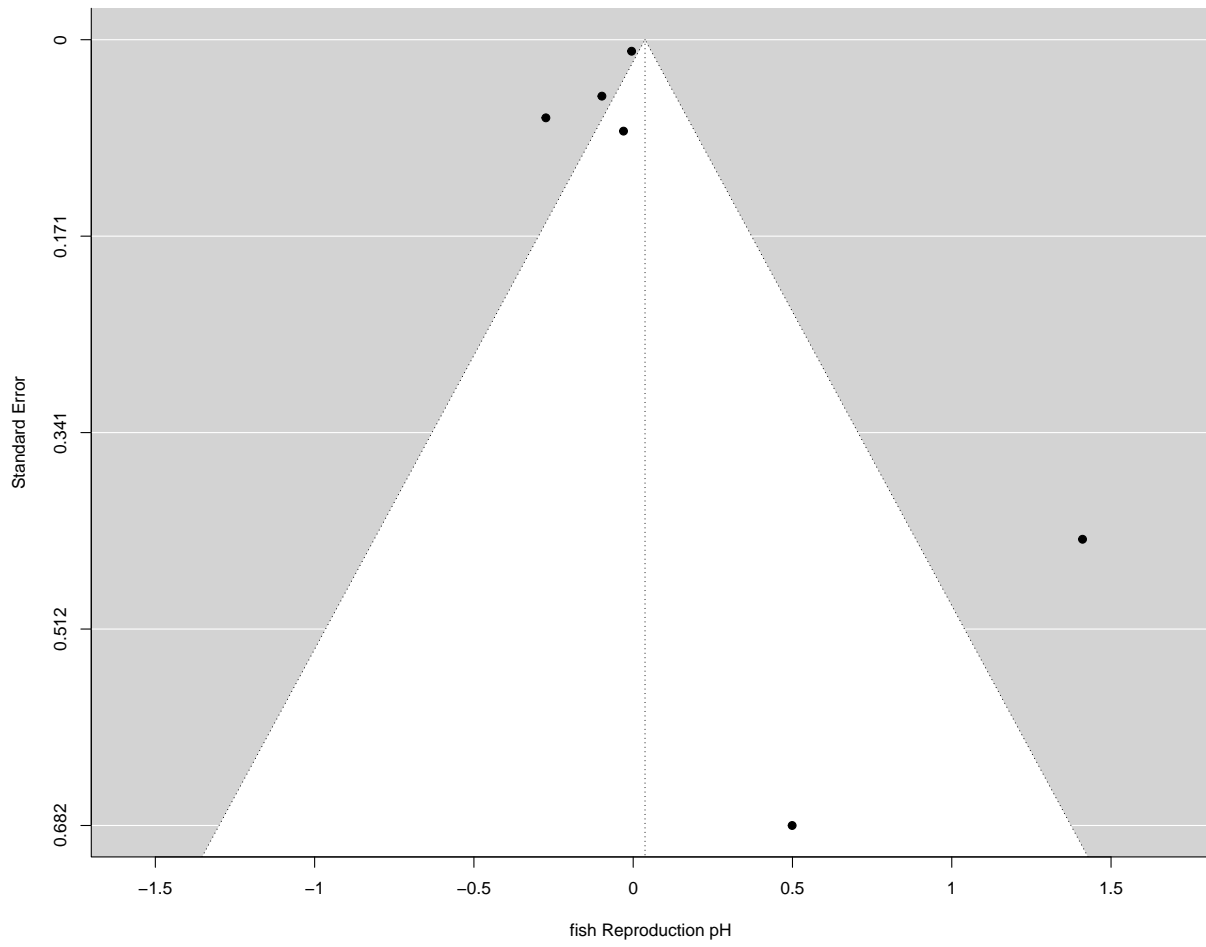

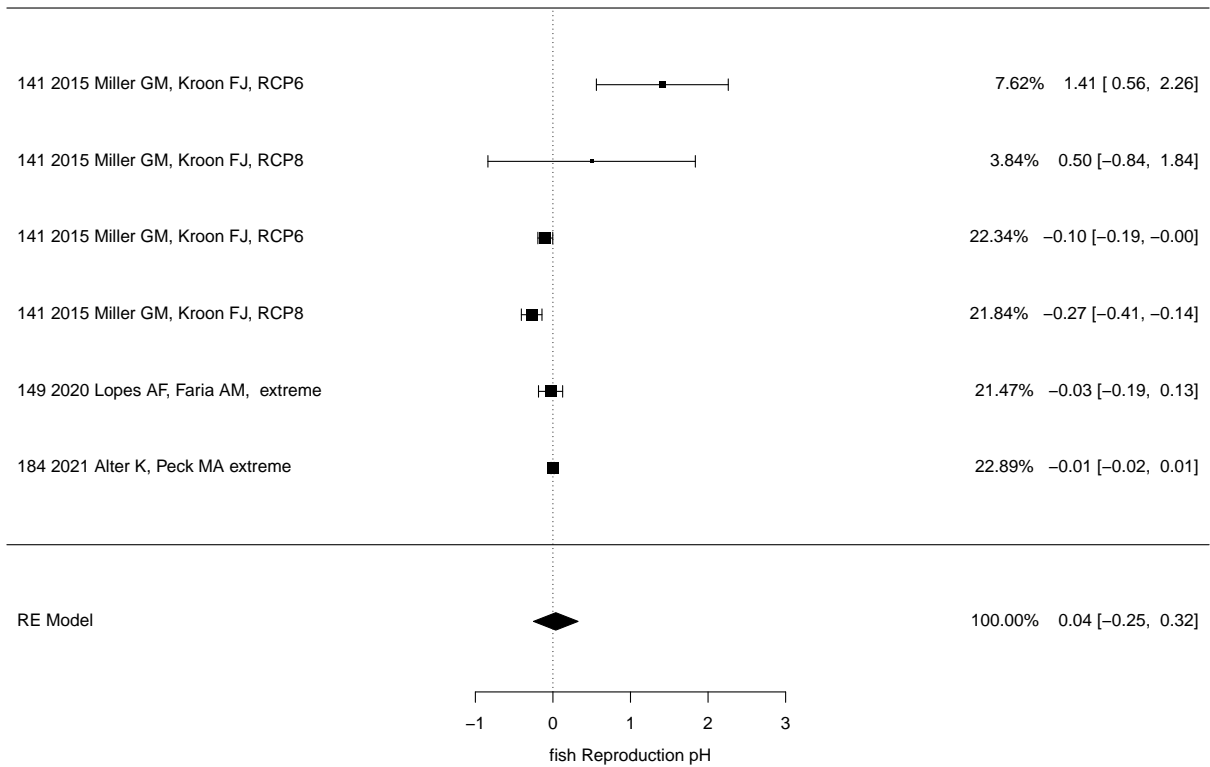

```

##
## Random-Effects Model (k = 10; tau^2 estimator: REML)
##
## tau^2 (estimated amount of total heterogeneity): 0.0879 (SE = 0.0650)
## tau (square root of estimated tau^2 value):      0.2966
## I^2 (total heterogeneity / total variability):   96.97%
## H^2 (total variability / sampling variability):  33.04
##
## Test for Heterogeneity:
## Q(df = 9) = 66.1860, p-val < .0001
##
## Model Results:
##
## estimate      se      zval      pval      ci.lb      ci.ub
## -0.2391  0.1225  -1.9510  0.0511  -0.4792  0.0011
##
## ---
## Signif. codes:  0 '***' 0.001 '**' 0.01 '*' 0.05 '.' 0.1 ' ' 1

```

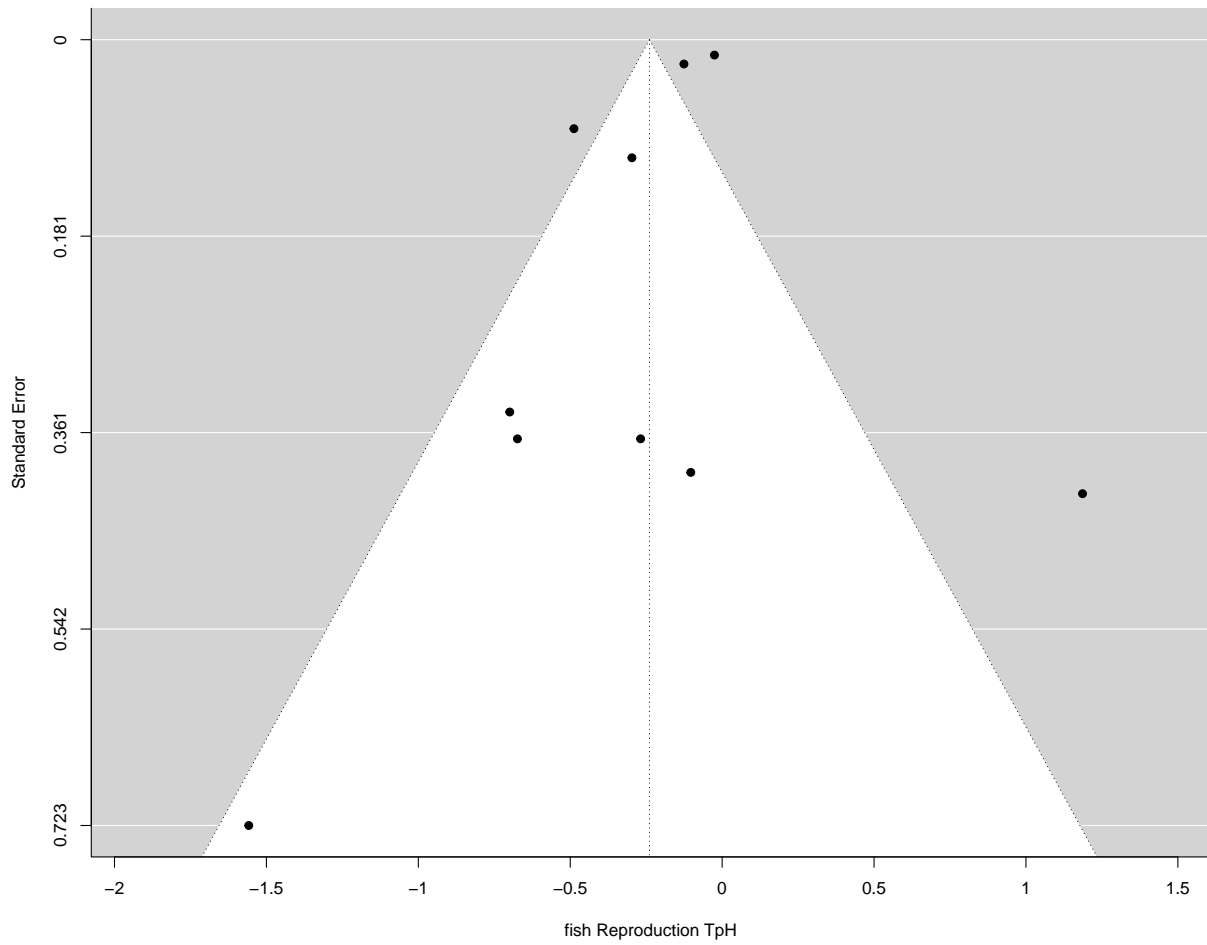

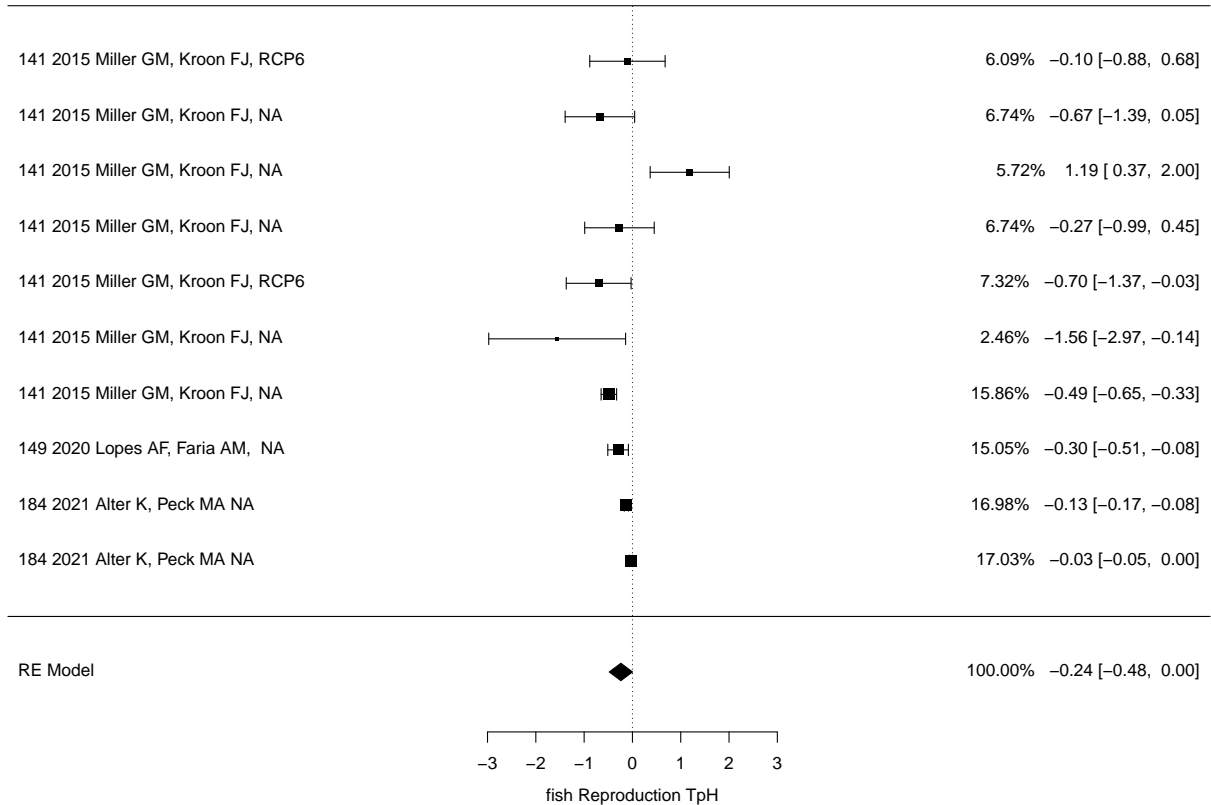

```
Abs_FishRepro <- MA_TpH_abs("fish", "Reproduction", Fish)

## Invertebrate, Behaviour
InvertBehav <- MA_TpH("inverts", "Behaviour", Inverts, sensitivity)
```

```
##
## Random-Effects Model (k = 40; tau^2 estimator: REML)
##
## tau^2 (estimated amount of total heterogeneity): 0.2946 (SE = 0.0781)
## tau (square root of estimated tau^2 value): 0.5427
## I^2 (total heterogeneity / total variability): 97.81%
## H^2 (total variability / sampling variability): 45.71
##
## Test for Heterogeneity:
## Q(df = 39) = 974.4411, p-val < .0001
##
## Model Results:
##
## estimate se zval pval ci.lb ci.ub
## -0.0043 0.0934 -0.0460 0.9633 -0.1874 0.1788
```

```
##  
## ---  
## Signif. codes:  0 '***' 0.001 '**' 0.01 '*' 0.05 '.' 0.1 ' ' 1
```

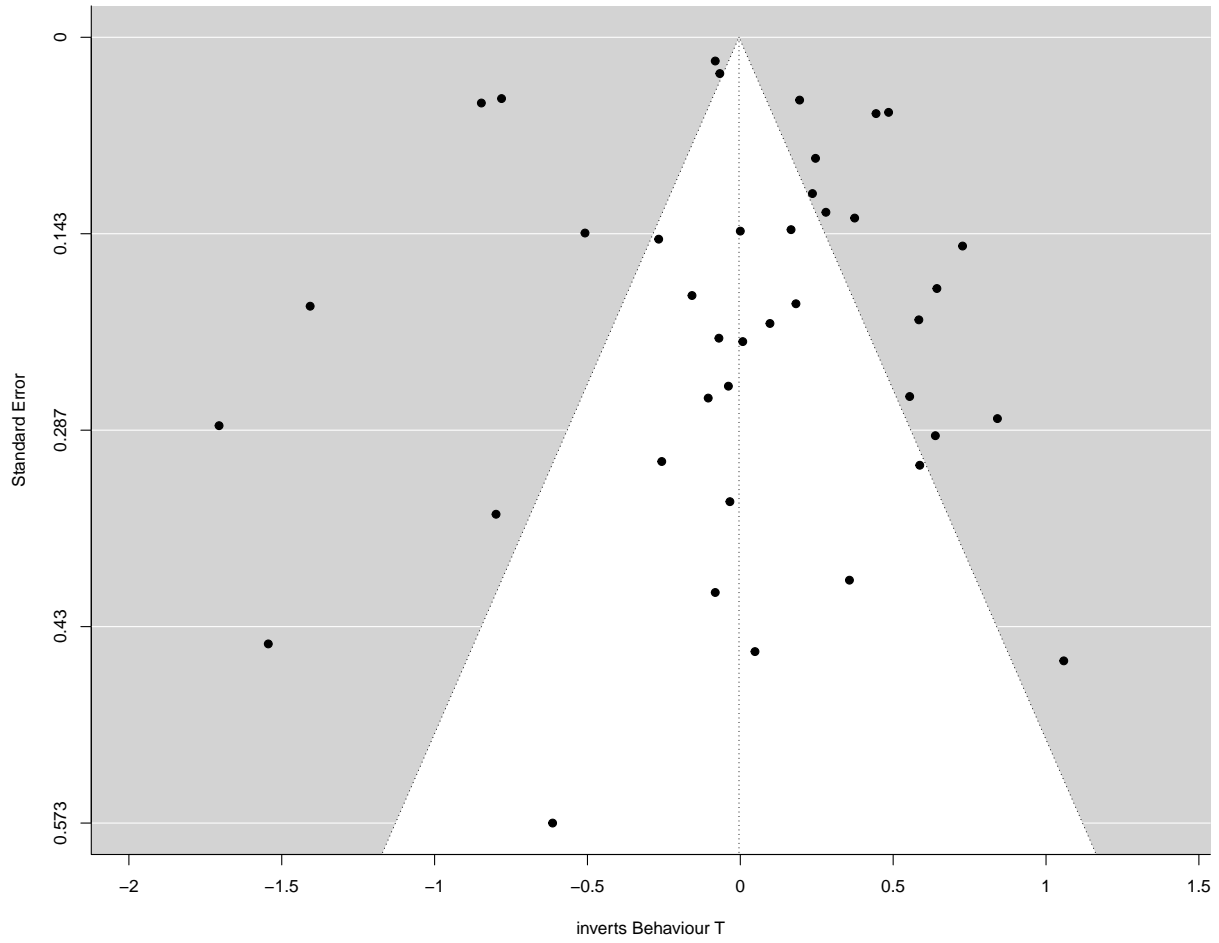

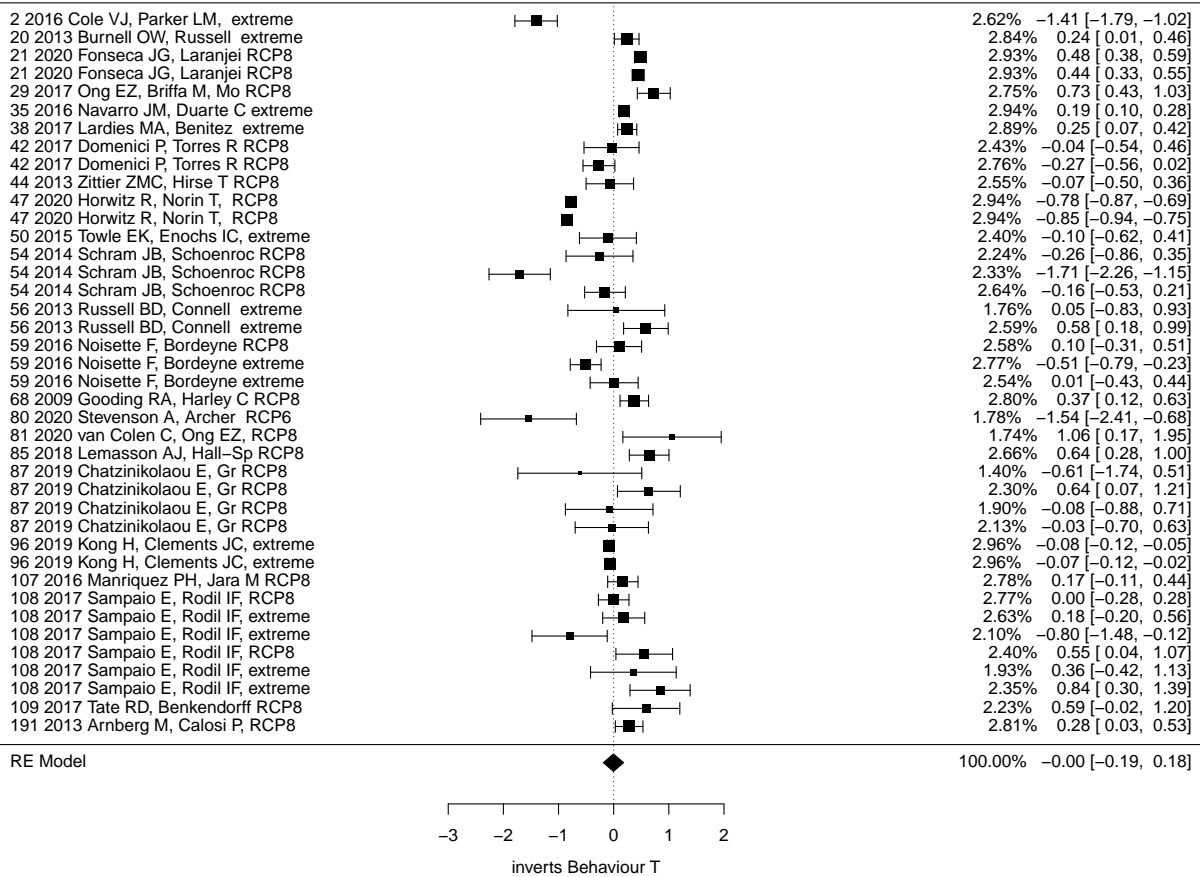

```
##
## Random-Effects Model (k = 40; tau^2 estimator: REML)
##
## tau^2 (estimated amount of total heterogeneity): 0.2631 (SE = 0.0723)
## tau (square root of estimated tau^2 value):      0.5129
## I^2 (total heterogeneity / total variability):   96.59%
## H^2 (total variability / sampling variability):  29.36
##
## Test for Heterogeneity:
## Q(df = 39) = 369.5507, p-val < .0001
##
## Model Results:
##
## estimate      se      zval      pval      ci.lb      ci.ub
## -0.2214  0.0903  -2.4513  0.0142  -0.3984  -0.0444  *
##
## ---
## Signif. codes:  0 '***' 0.001 '**' 0.01 '*' 0.05 '.' 0.1 ' ' 1
```

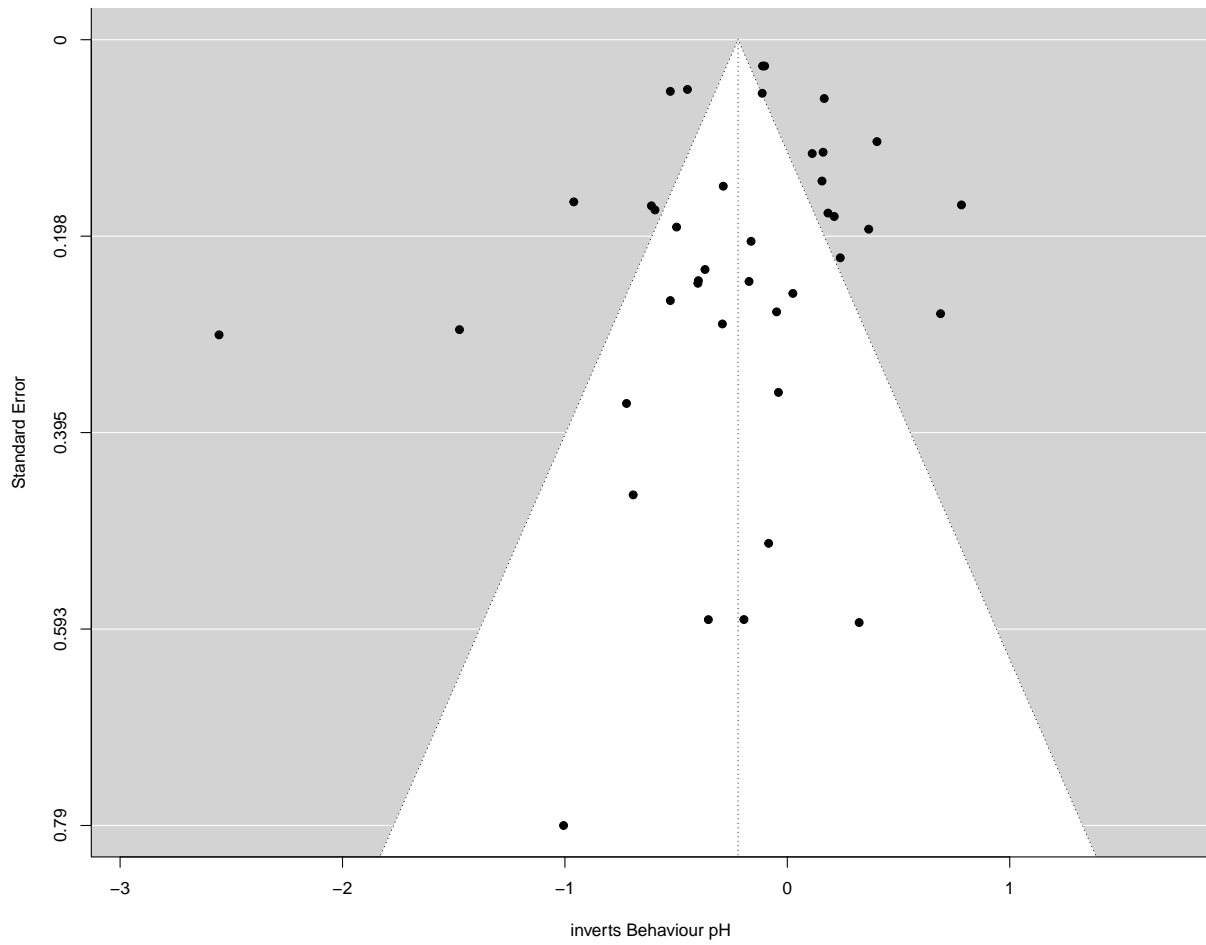

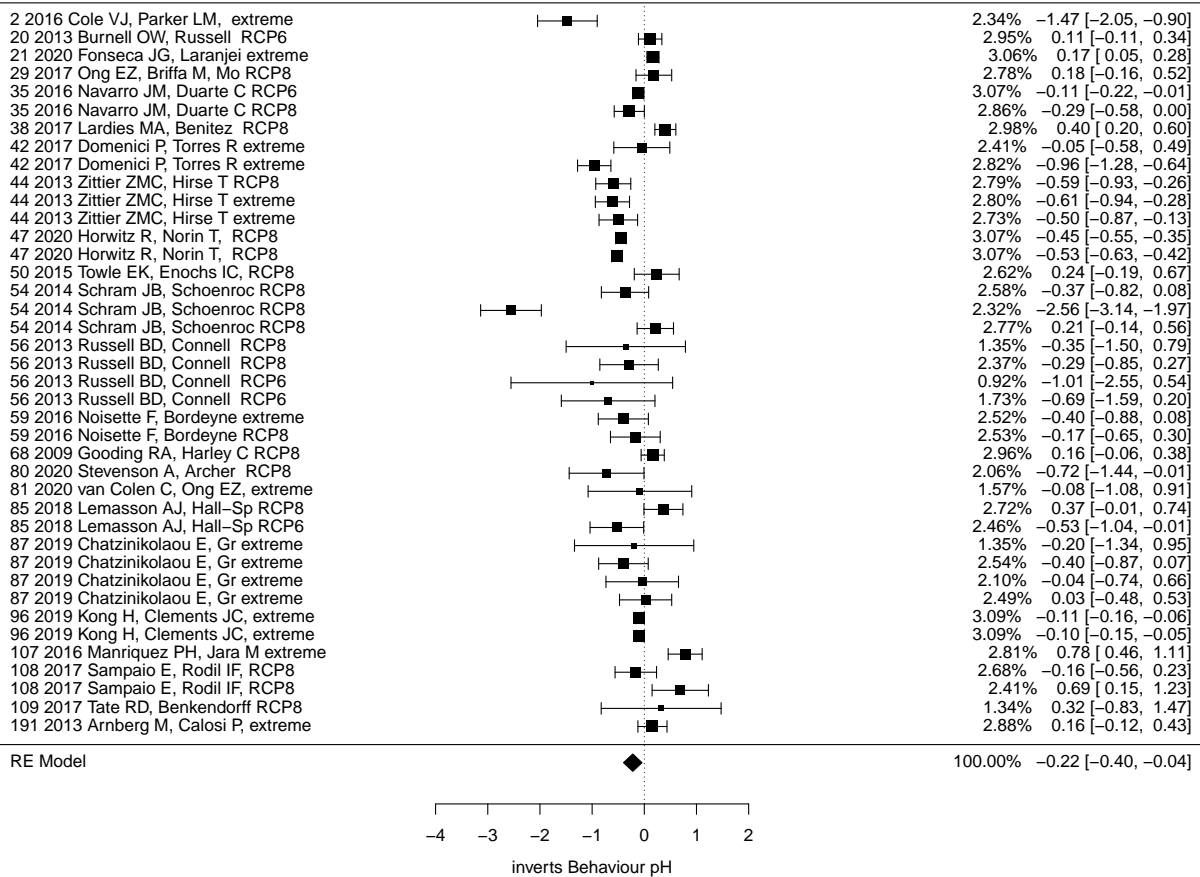

```
##
## Random-Effects Model (k = 49; tau^2 estimator: REML)
##
## tau^2 (estimated amount of total heterogeneity): 0.2571 (SE = 0.0627)
## tau (square root of estimated tau^2 value): 0.5071
## I^2 (total heterogeneity / total variability): 96.74%
## H^2 (total variability / sampling variability): 30.70
##
## Test for Heterogeneity:
## Q(df = 48) = 1220.5124, p-val < .0001
##
## Model Results:
##
## estimate se zval pval ci.lb ci.ub
## 0.0233 0.0800 0.2918 0.7704 -0.1334 0.1801
##
## ---
## Signif. codes: 0 '***' 0.001 '**' 0.01 '*' 0.05 '.' 0.1 ' ' 1
```

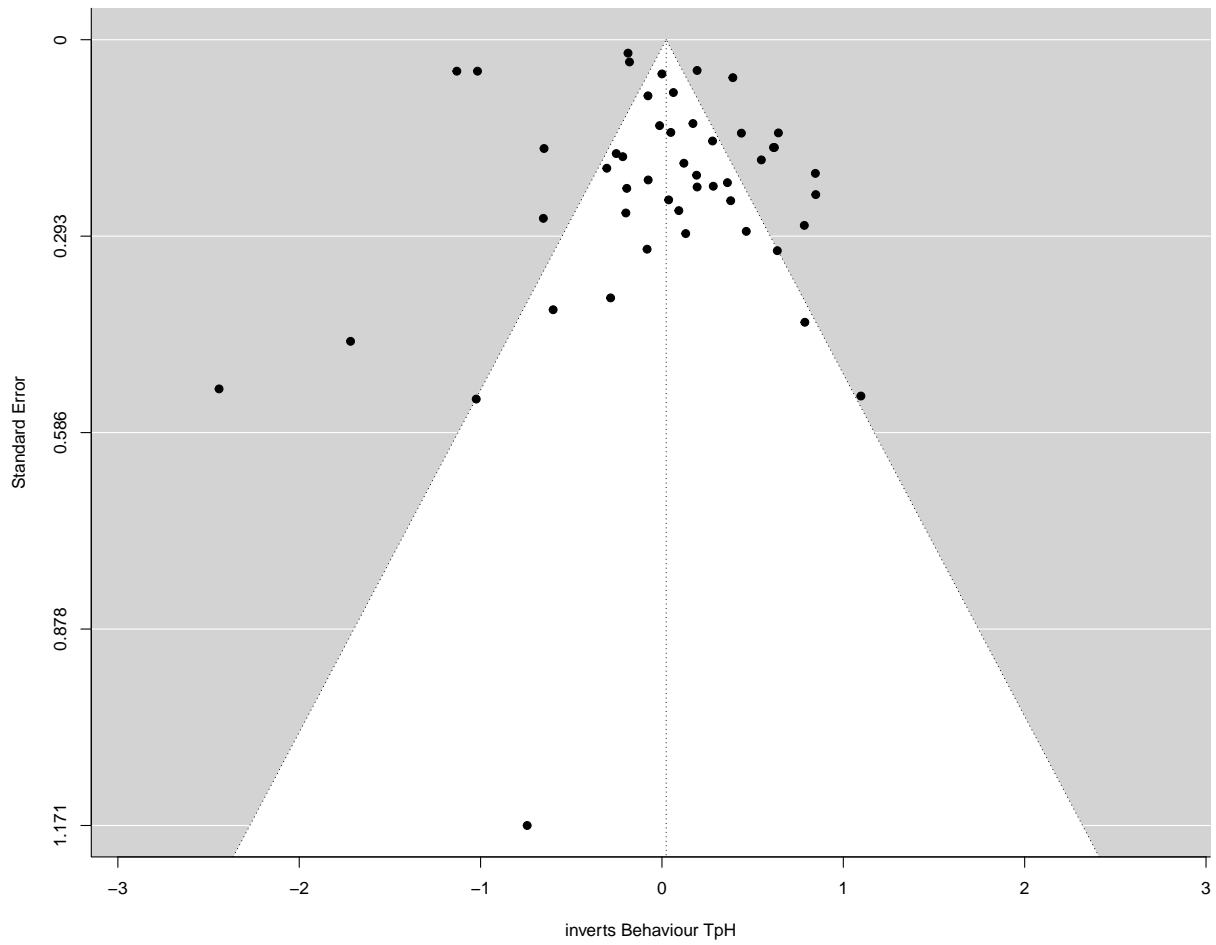

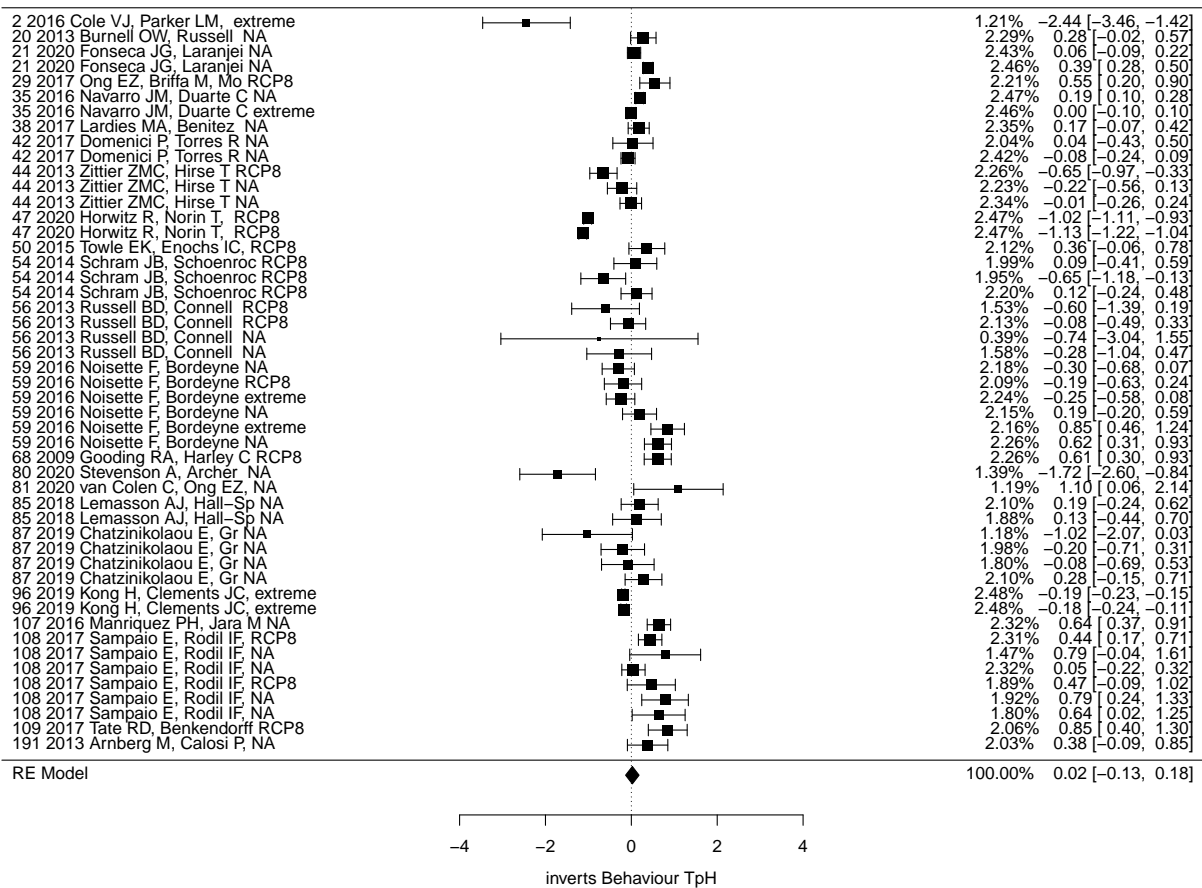

```
Abs_InvertBehav <- MA_TpH_abs("inverts","Behaviour", Inverts)
```

```
## Fish, Behaviour
```

```
FishBehav <- MA_TpH("fish","Behaviour", Fish,sensitivity)
```

```
##
## Random-Effects Model (k = 38; tau^2 estimator: REML)
##
## tau^2 (estimated amount of total heterogeneity): 0.1389 (SE = 0.0394)
## tau (square root of estimated tau^2 value): 0.3727
## I^2 (total heterogeneity / total variability): 92.99%
## H^2 (total variability / sampling variability): 14.26
##
## Test for Heterogeneity:
## Q(df = 37) = 331.8272, p-val < .0001
##
## Model Results:
##
## estimate se zval pval ci.lb ci.ub
## 0.0632 0.0675 0.9358 0.3494 -0.0692 0.1955
```

```
##
## ---
## Signif. codes:  0 '***' 0.001 '**' 0.01 '*' 0.05 '.' 0.1 ' ' 1
```

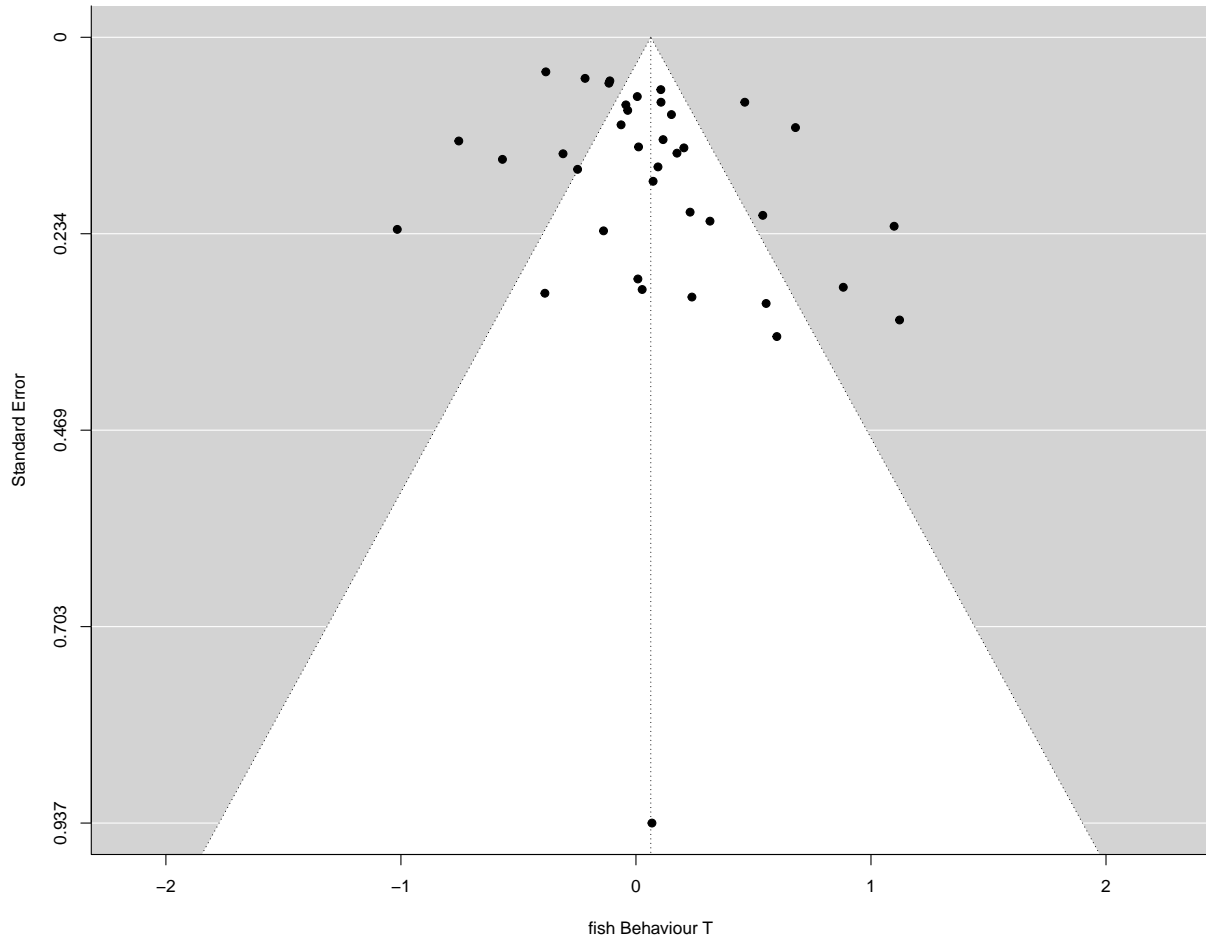

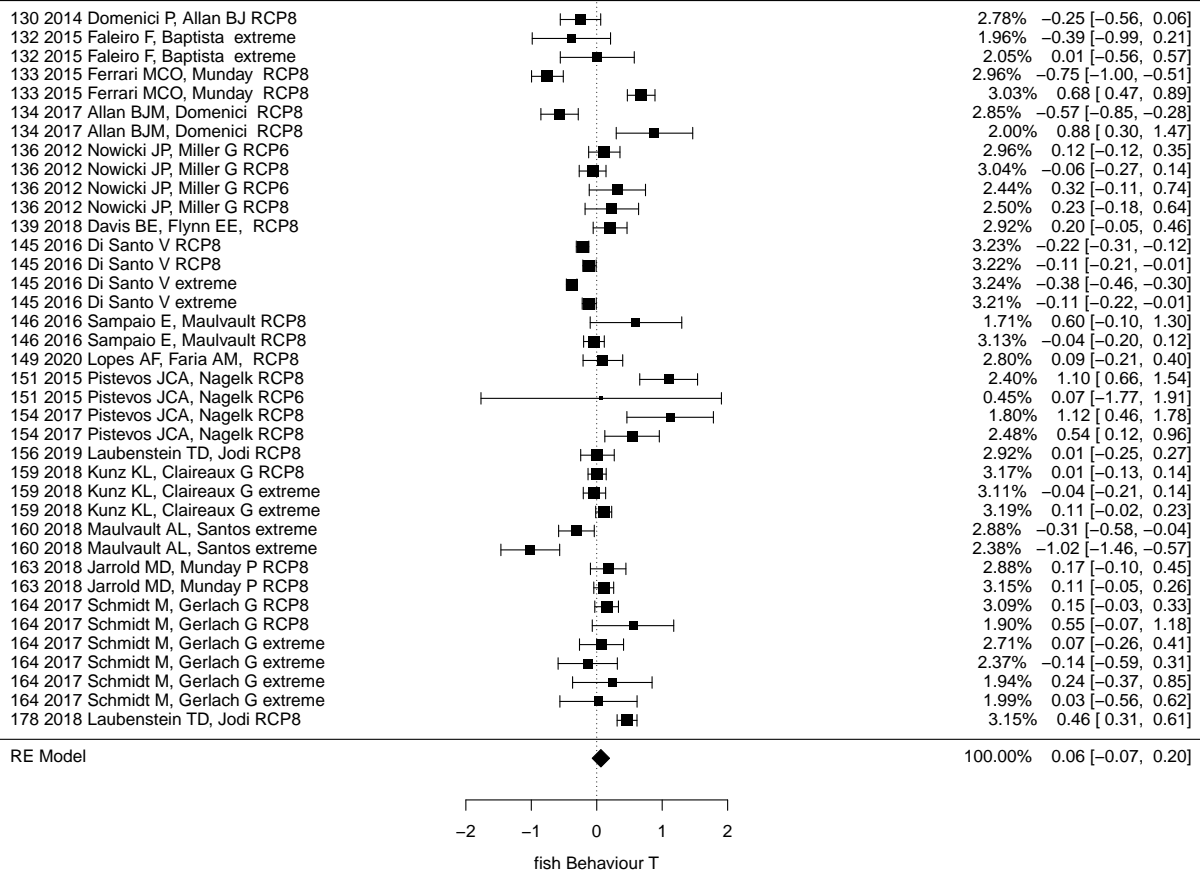

```

##
## Random-Effects Model (k = 33; tau^2 estimator: REML)
##
## tau^2 (estimated amount of total heterogeneity): 0.2096 (SE = 0.0620)
## tau (square root of estimated tau^2 value):      0.4578
## I^2 (total heterogeneity / total variability):   93.35%
## H^2 (total variability / sampling variability):  15.03
##
## Test for Heterogeneity:
## Q(df = 32) = 263.9107, p-val < .0001
##
## Model Results:
##
## estimate      se      zval      pval      ci.lb      ci.ub
## -0.0651  0.0875  -0.7447  0.4565  -0.2365  0.1063
##
## ---
## Signif. codes:  0 '***' 0.001 '**' 0.01 '*' 0.05 '.' 0.1 ' ' 1

```

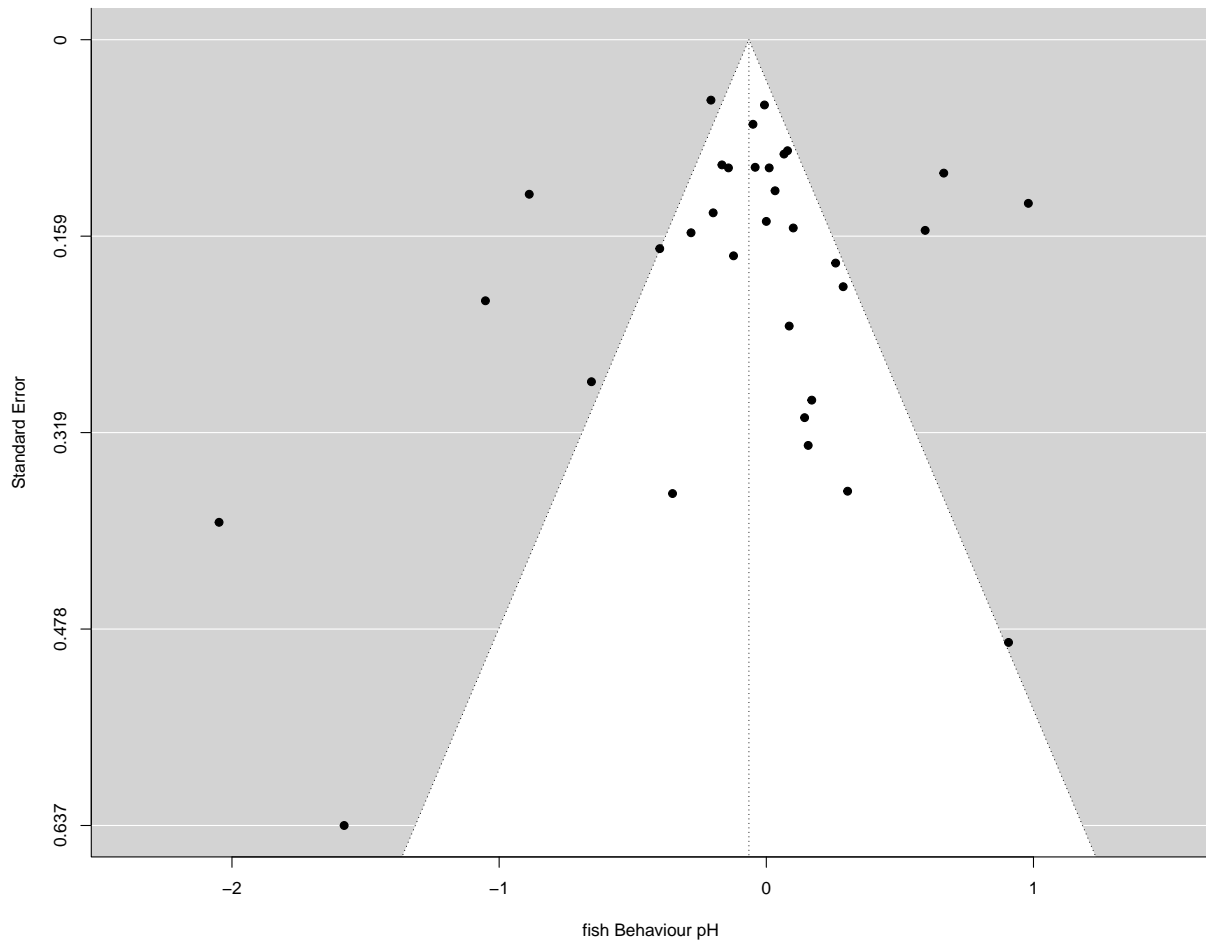

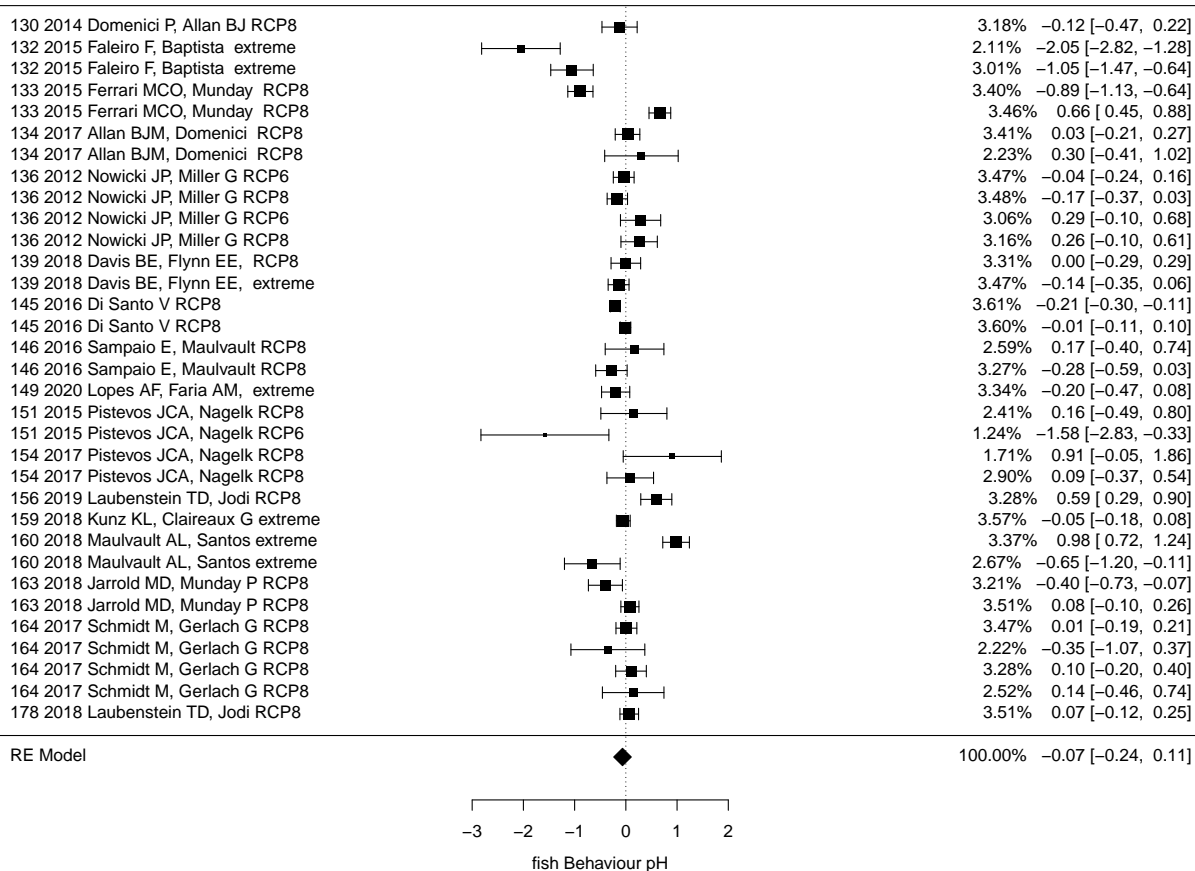

```

##
## Random-Effects Model (k = 43; tau^2 estimator: REML)
##
## tau^2 (estimated amount of total heterogeneity): 0.1394 (SE = 0.0368)
## tau (square root of estimated tau^2 value):      0.3733
## I^2 (total heterogeneity / total variability):   93.56%
## H^2 (total variability / sampling variability):  15.53
##
## Test for Heterogeneity:
## Q(df = 42) = 348.5382, p-val < .0001
##
## Model Results:
##
## estimate      se      zval      pval      ci.lb      ci.ub
## 0.0180 0.0633 0.2851 0.7756 -0.1060 0.1420
##
## ---
## Signif. codes:  0 '***' 0.001 '**' 0.01 '*' 0.05 '.' 0.1 ' ' 1

```

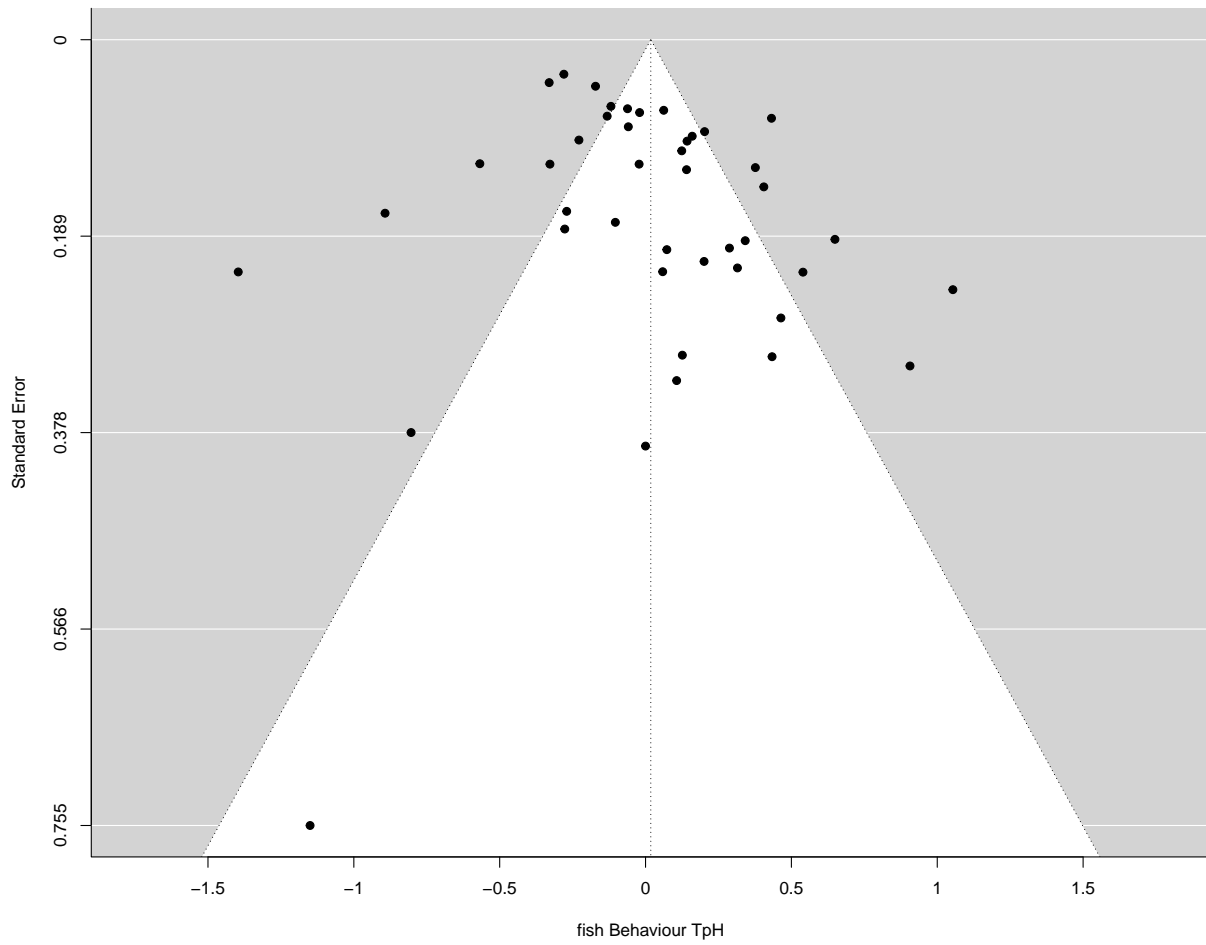

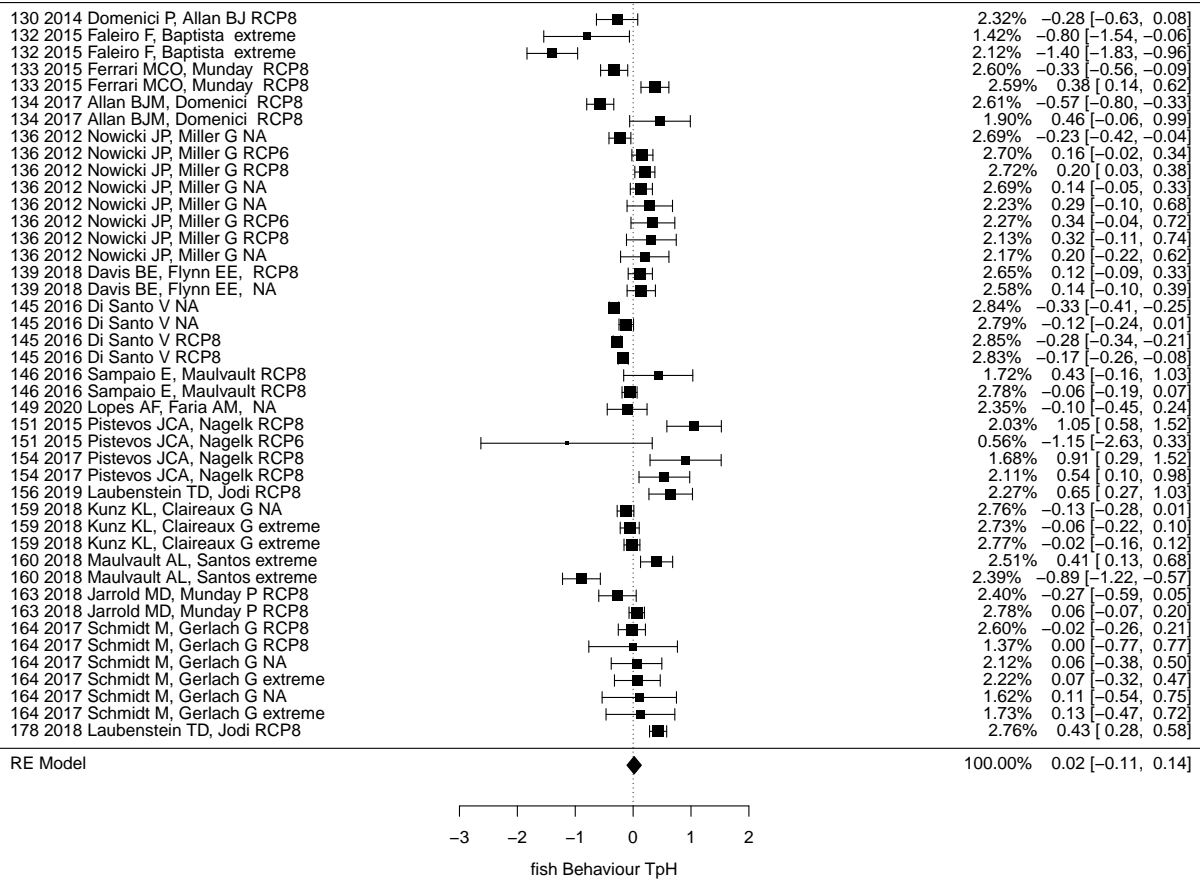

```

Abs_FishBehav <- MA_TpH_abs("fish", "Behaviour", Fish)

## Invertebrate, Biomechanics
InvertBio <- MA_TpH("inverts", "Biomechanics", Inverts, sensitivity)

##
## Random-Effects Model (k = 18; tau^2 estimator: REML)
##
## tau^2 (estimated amount of total heterogeneity): 0.0690 (SE = 0.0293)
## tau (square root of estimated tau^2 value):      0.2627
## I^2 (total heterogeneity / total variability):    94.81%
## H^2 (total variability / sampling variability):    19.25
##
## Test for Heterogeneity:
## Q(df = 17) = 160.0385, p-val < .0001
##
## Model Results:
##
## estimate      se      zval      pval      ci.lb      ci.ub
## -0.0289      0.0701    -0.4125    0.6800    -0.1663    0.1085

```

```
##  
## ---  
## Signif. codes:  0 '***' 0.001 '**' 0.01 '*' 0.05 '.' 0.1 ' ' 1
```

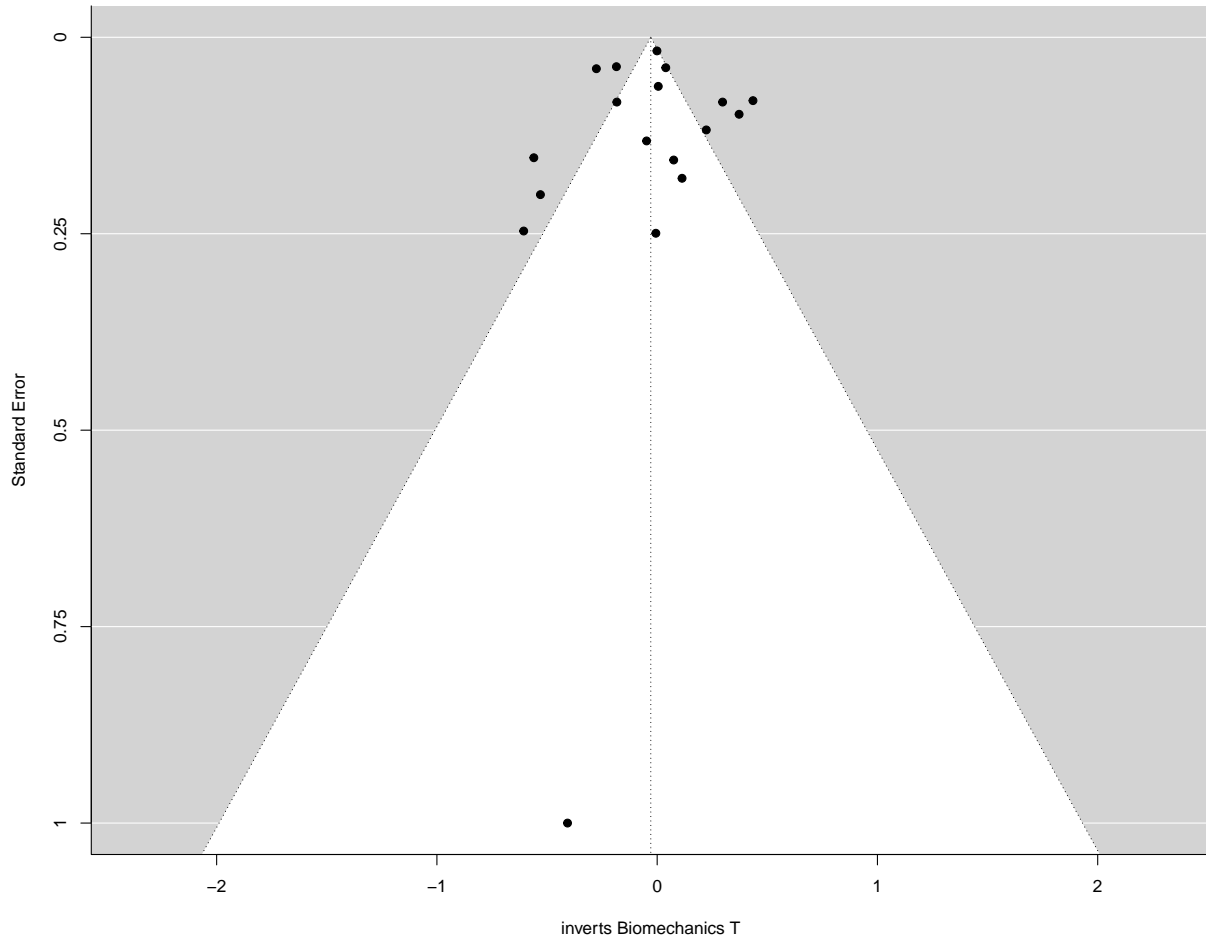

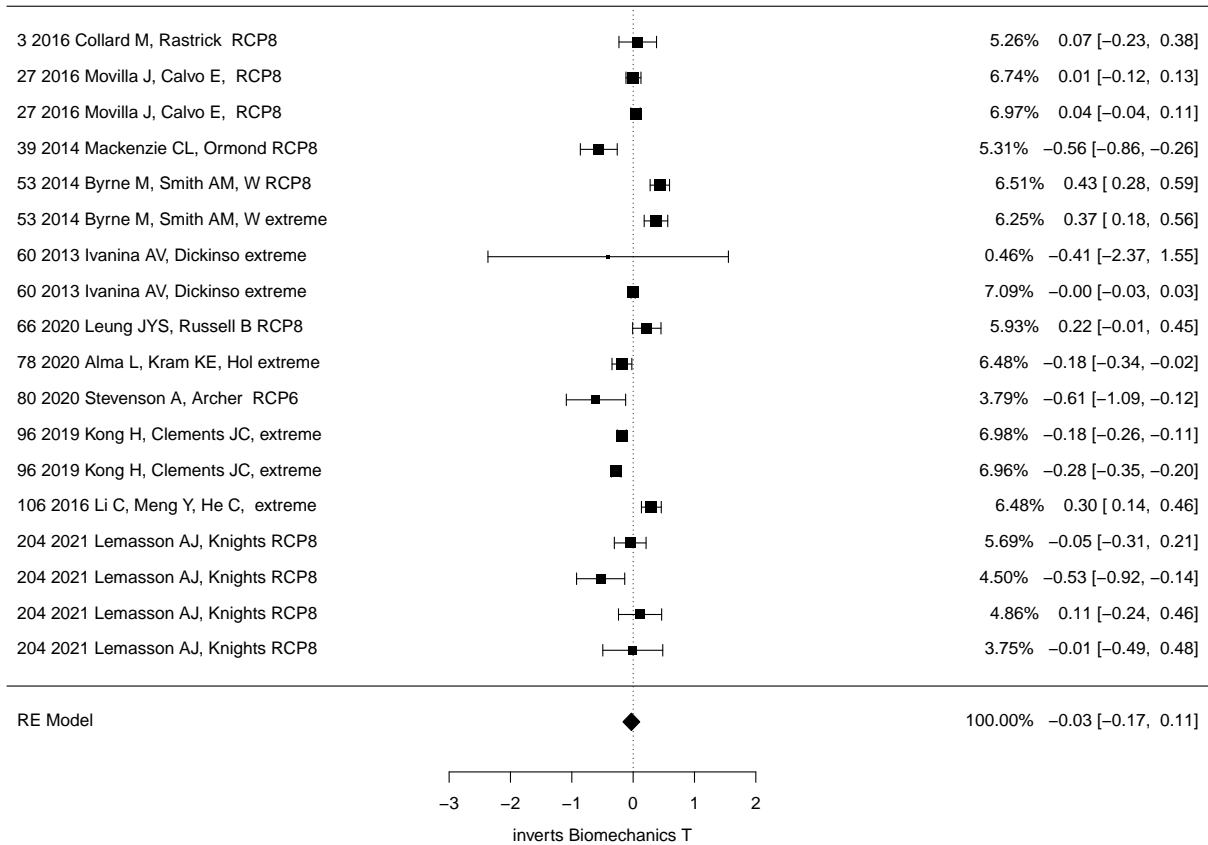

```

##
## Random-Effects Model (k = 23; tau^2 estimator: REML)
##
## tau^2 (estimated amount of total heterogeneity): 0.0308 (SE = 0.0128)
## tau (square root of estimated tau^2 value):      0.1754
## I^2 (total heterogeneity / total variability):   91.27%
## H^2 (total variability / sampling variability):  11.46
##
## Test for Heterogeneity:
## Q(df = 22) = 144.6044, p-val < .0001
##
## Model Results:
##
## estimate      se      zval      pval      ci.lb      ci.ub
## -0.1150  0.0440  -2.6147  0.0089  -0.2012  -0.0288  **
##
## ---
## Signif. codes:  0 '***' 0.001 '**' 0.01 '*' 0.05 '.' 0.1 ' ' 1

```

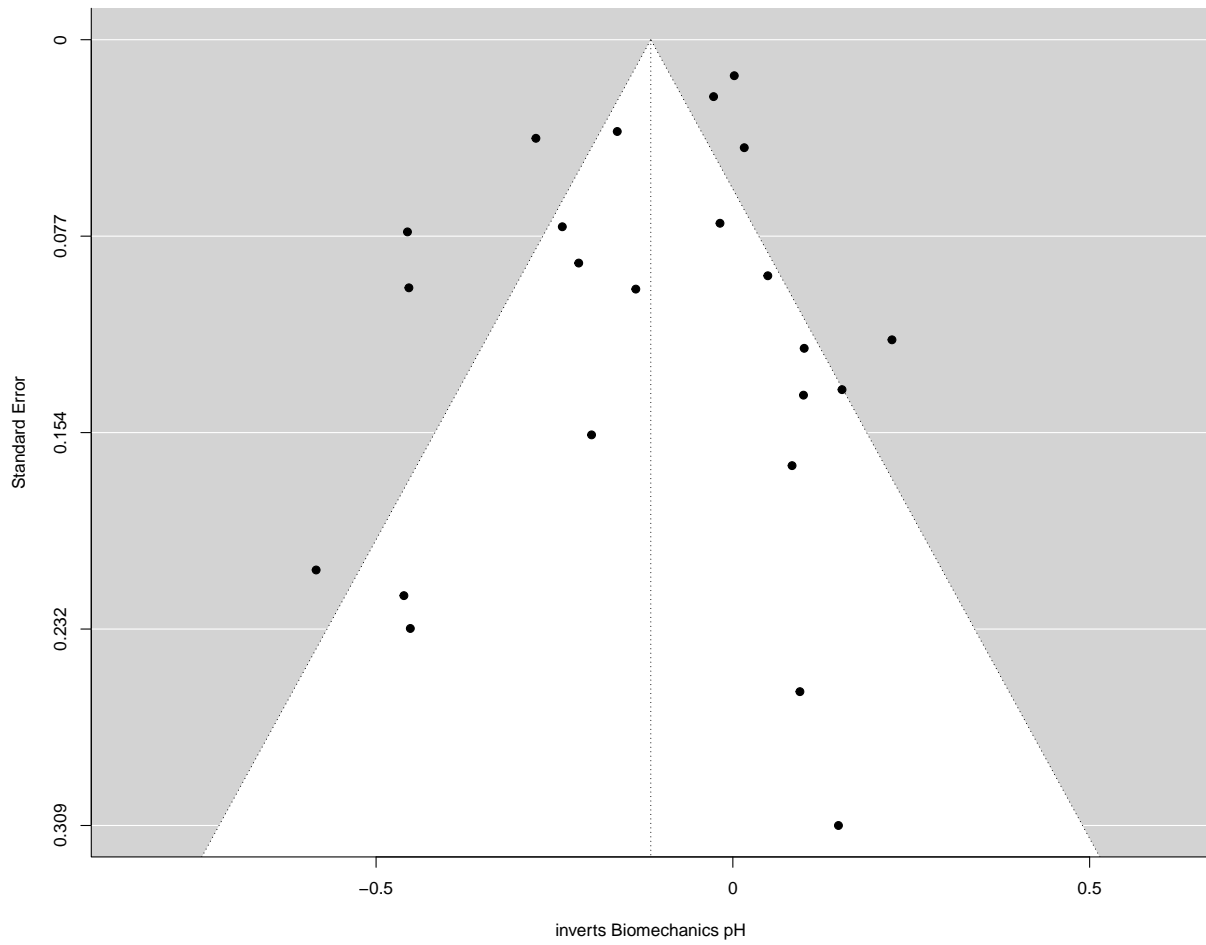

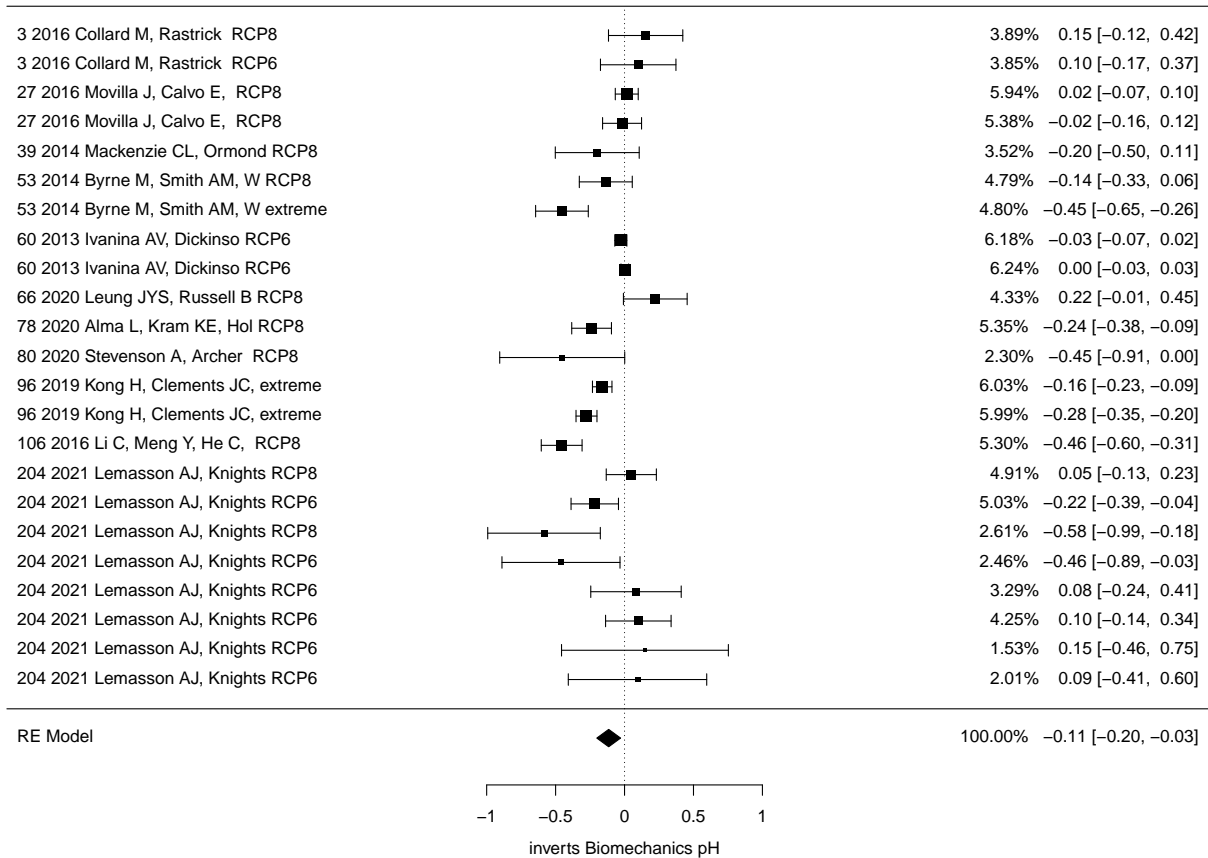

```

##
## Random-Effects Model (k = 24; tau^2 estimator: REML)
##
## tau^2 (estimated amount of total heterogeneity): 0.0603 (SE = 0.0228)
## tau (square root of estimated tau^2 value):      0.2456
## I^2 (total heterogeneity / total variability):   95.89%
## H^2 (total variability / sampling variability):  24.35
##
## Test for Heterogeneity:
## Q(df = 23) = 302.2425, p-val < .0001
##
## Model Results:
##
## estimate      se      zval      pval      ci.lb      ci.ub
## -0.0582  0.0576  -1.0111  0.3120  -0.1711  0.0546
##
## ---
## Signif. codes:  0 '***' 0.001 '**' 0.01 '*' 0.05 '.' 0.1 ' ' 1

```

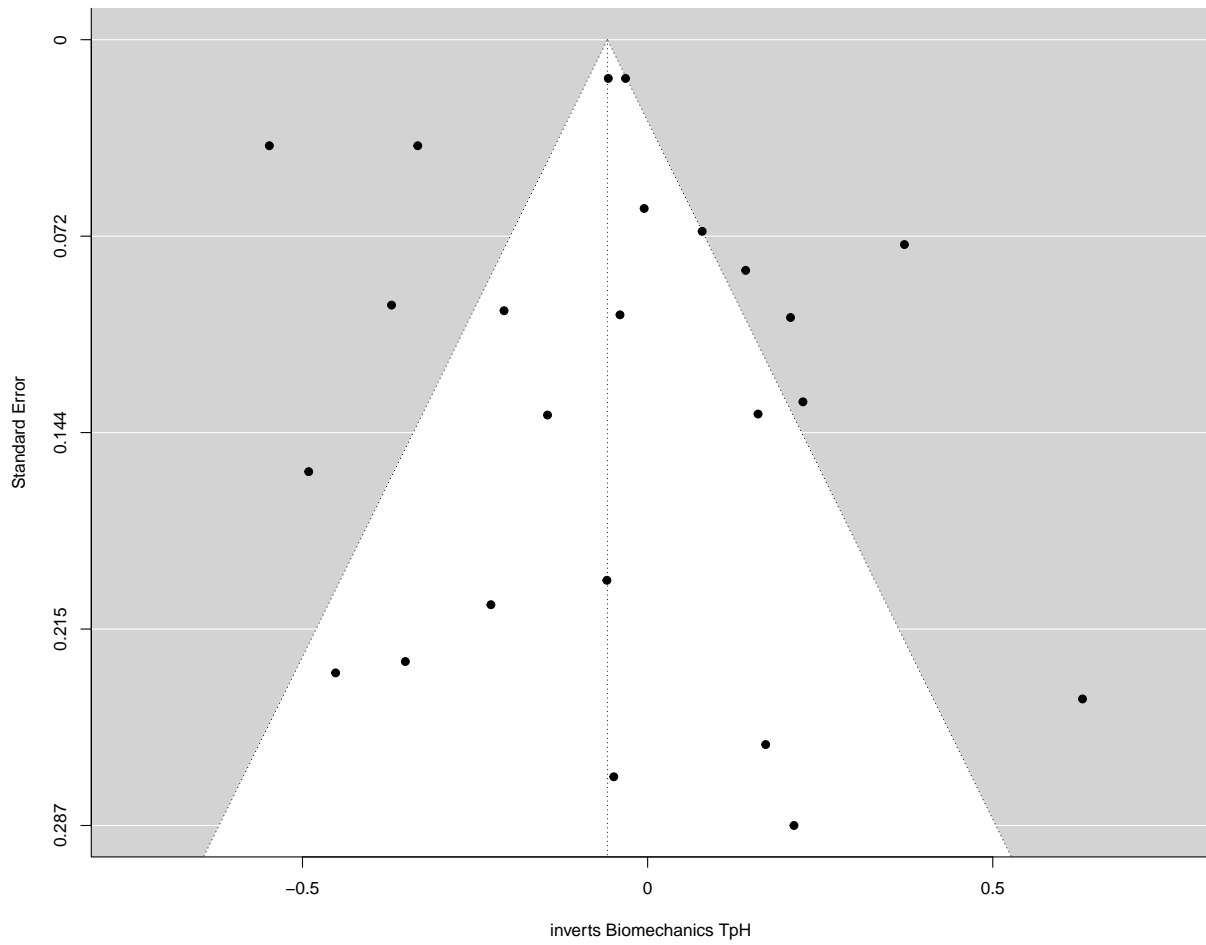

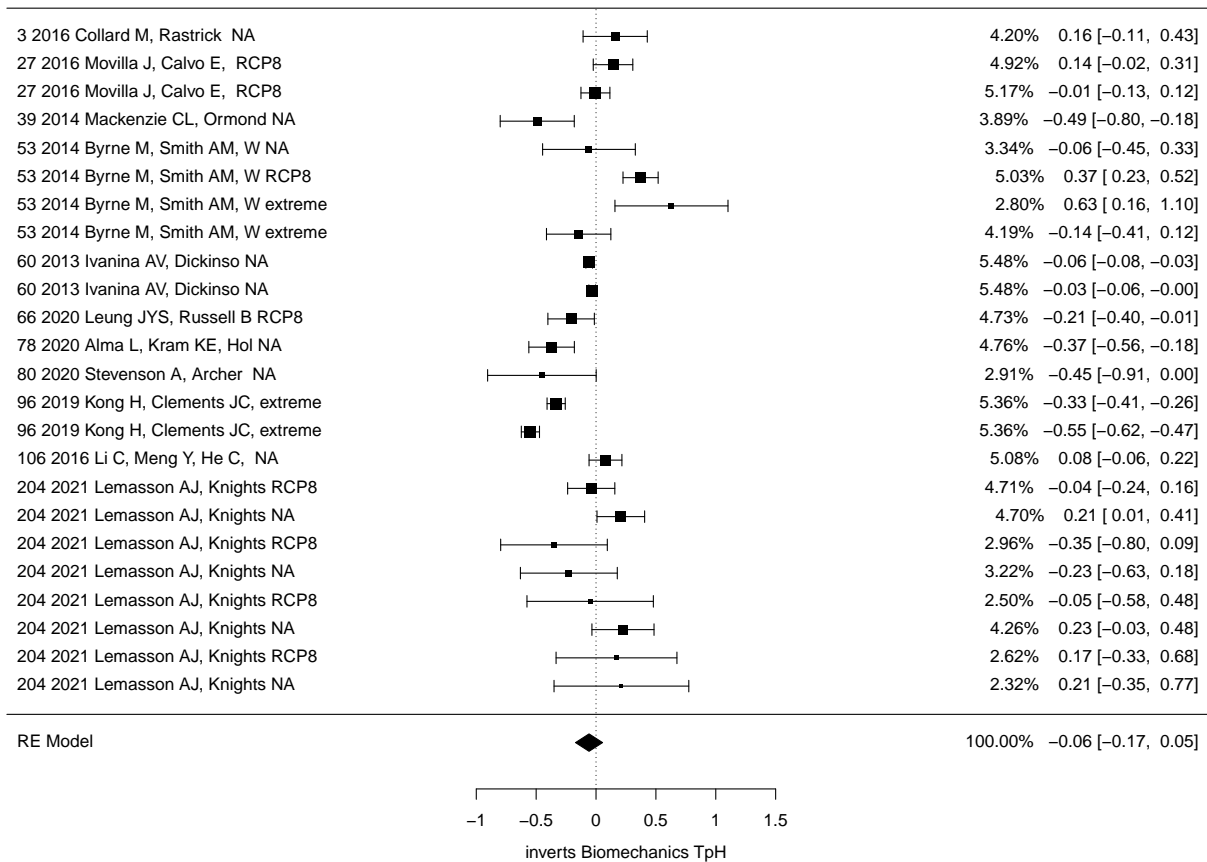

```

Abs_InvertBio <- MA_TpH_abs("inverts", "Biomechanics", Inverts)

## Invertebrate, Development
InvertDev <- MA_TpH("inverts", "Development", Inverts, sensitivity)

##
## Random-Effects Model (k = 72; tau^2 estimator: REML)
##
## tau^2 (estimated amount of total heterogeneity): 0.3822 (SE = 0.0706)
## tau (square root of estimated tau^2 value):      0.6182
## I^2 (total heterogeneity / total variability):    99.63%
## H^2 (total variability / sampling variability):   272.67
##
## Test for Heterogeneity:
## Q(df = 71) = 2933.6282, p-val < .0001
##
## Model Results:
##
## estimate      se      zval      pval      ci.lb      ci.ub
## -0.1487  0.0775  -1.9188  0.0550  -0.3006  0.0032

```

```
##
## ---
## Signif. codes:  0 '***' 0.001 '**' 0.01 '*' 0.05 '.' 0.1 ' ' 1
```

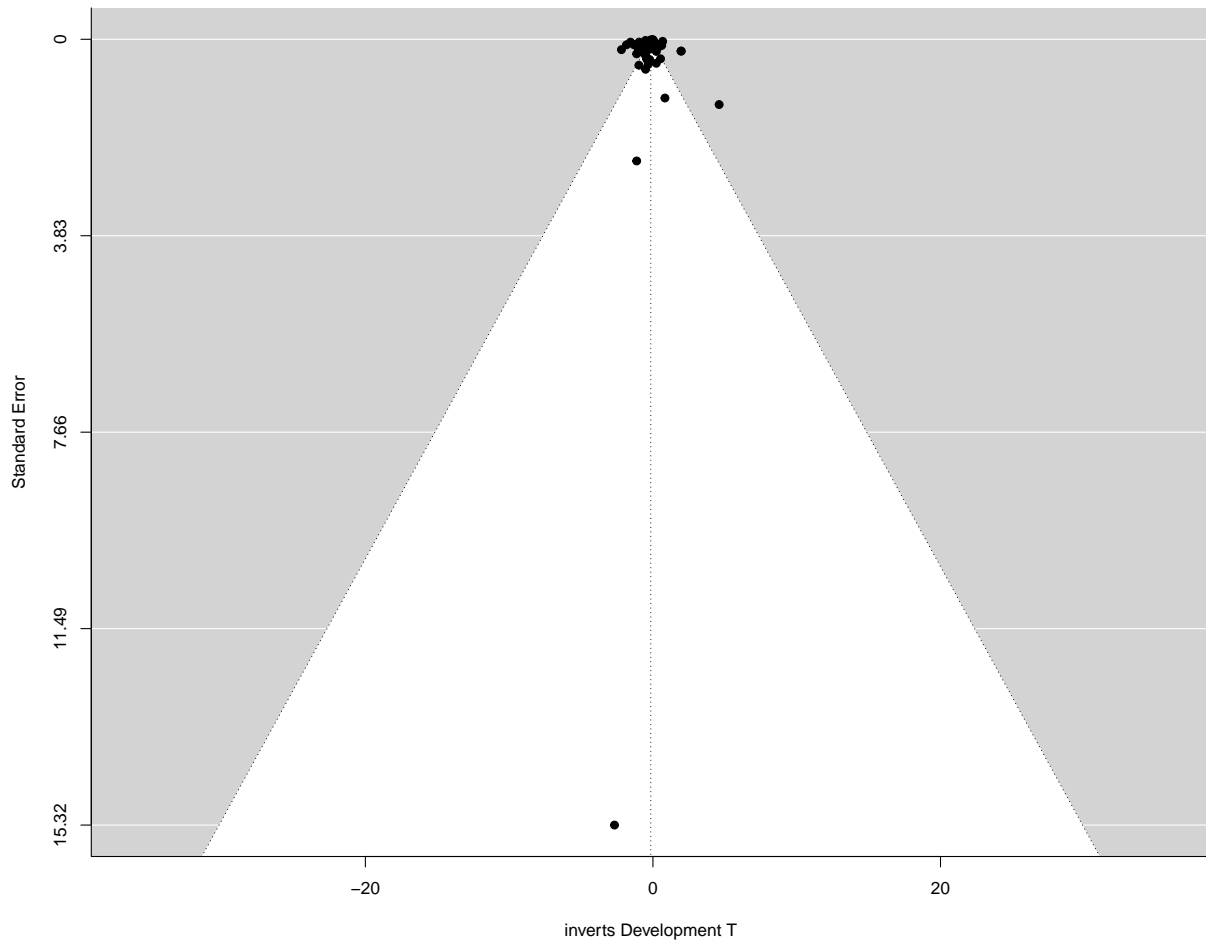

```
## Warning in text.default(...): conversion failure on '40 2018 Parker LM, O'Connor
## extreme' in 'mbsToSbcs': dot substituted for <e2>
```

```
## Warning in text.default(...): conversion failure on '40 2018 Parker LM, O'Connor
## extreme' in 'mbsToSbcs': dot substituted for <80>
```

```
## Warning in text.default(...): conversion failure on '40 2018 Parker LM, O'Connor
## extreme' in 'mbsToSbcs': dot substituted for <99>
```

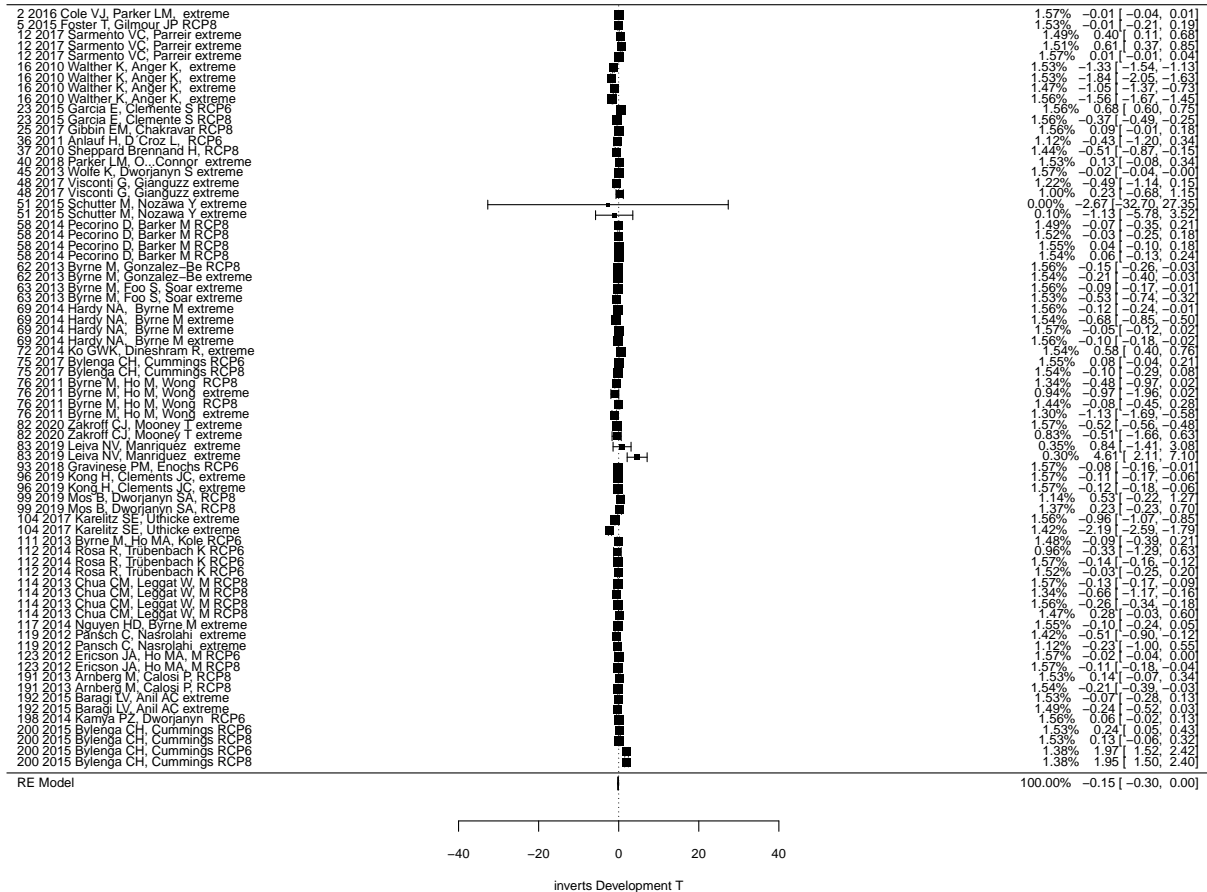

```

##
## Random-Effects Model (k = 108; tau^2 estimator: REML)
##
## tau^2 (estimated amount of total heterogeneity): 0.0547 (SE = 0.0097)
## tau (square root of estimated tau^2 value): 0.2338
## I^2 (total heterogeneity / total variability): 97.89%
## H^2 (total variability / sampling variability): 47.43
##
## Test for Heterogeneity:
## Q(df = 107) = 1972.8062, p-val < .0001
##
## Model Results:
##
## estimate se zval pval ci.lb ci.ub
## -0.0946 0.0266 -3.5614 0.0004 -0.1467 -0.0426 ***
##
## ---
## Signif. codes: 0 '***' 0.001 '**' 0.01 '*' 0.05 '.' 0.1 ' ' 1

```

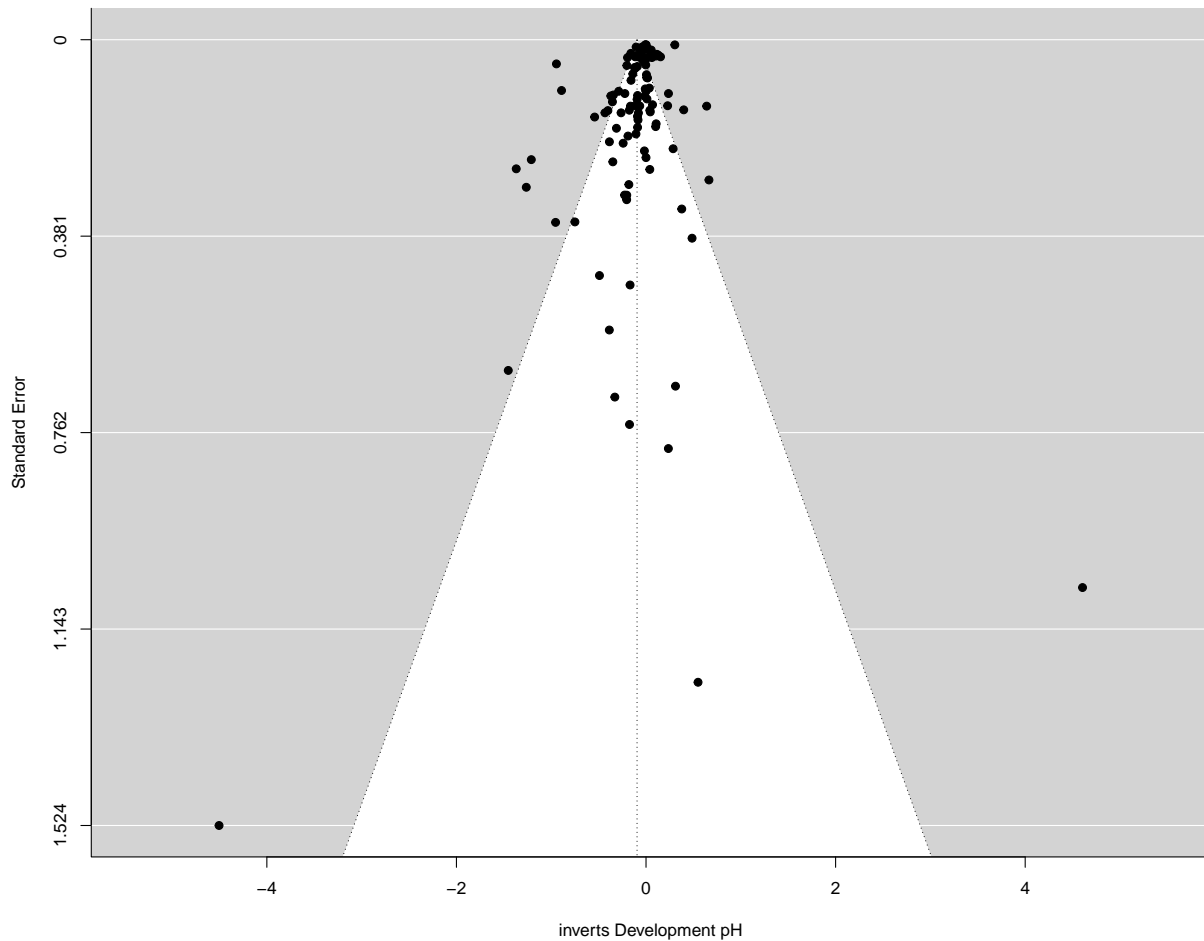

```
## Warning in text.default(...): conversion failure on '40 2018 Parker LM, O'Connor
## RCP8' in 'mbsToSbcs': dot substituted for <e2>
```

```
## Warning in text.default(...): conversion failure on '40 2018 Parker LM, O'Connor
## RCP8' in 'mbsToSbcs': dot substituted for <80>
```

```
## Warning in text.default(...): conversion failure on '40 2018 Parker LM, O'Connor
## RCP8' in 'mbsToSbcs': dot substituted for <99>
```

```
## Warning: Ratio of largest to smallest sampling variance extremely large. May not
## be able to obtain stable results.
```

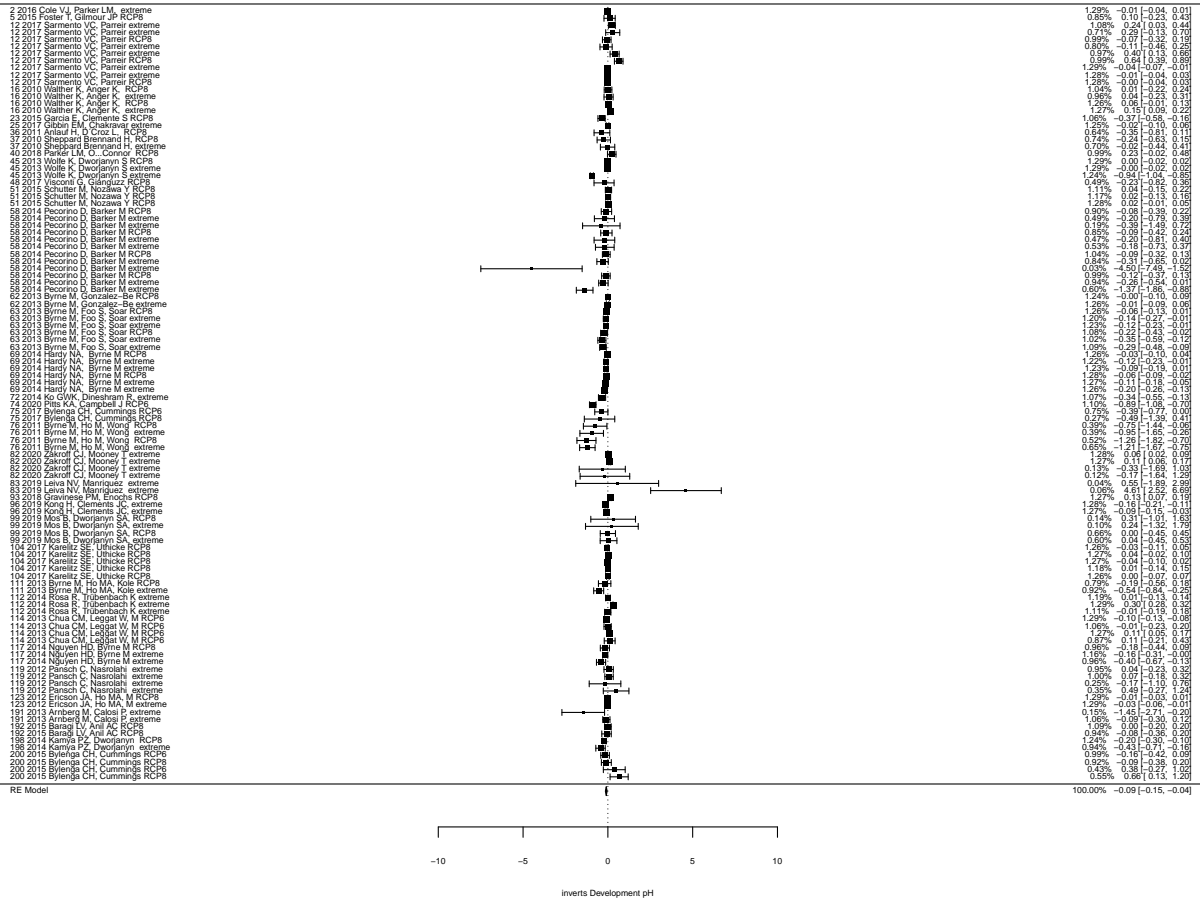

```
##
## Random-Effects Model (k = 129; tau^2 estimator: REML)
##
## tau^2 (estimated amount of total heterogeneity): 0.5652 (SE = 0.0763)
## tau (square root of estimated tau^2 value): 0.7518
## I^2 (total heterogeneity / total variability): 99.73%
## H^2 (total variability / sampling variability): 377.32
##
## Test for Heterogeneity:
## Q(df = 128) = 9737.9184, p-val < .0001
##
## Model Results:
##
## estimate se zval pval ci.lb ci.ub
## -0.2827 0.0695 -4.0705 <.0001 -0.4189 -0.1466 ***
##
## ---
## Signif. codes: 0 '***' 0.001 '**' 0.01 '*' 0.05 '.' 0.1 ' ' 1
```

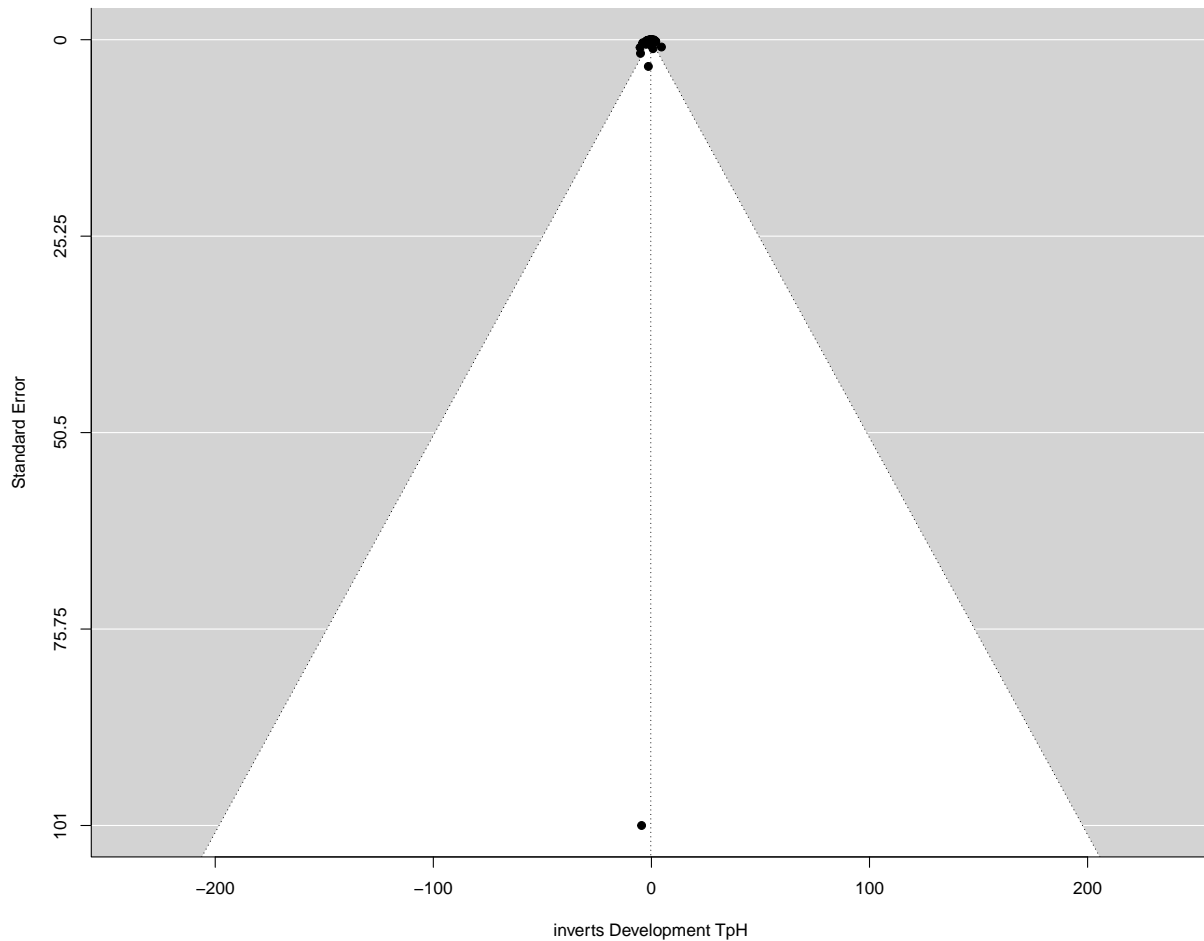

```
## Warning in text.default(...): conversion failure on '40 2018 Parker LM, O'Connor
## NA' in 'mbscsToSbcs': dot substituted for <e2>
```

```
## Warning in text.default(...): conversion failure on '40 2018 Parker LM, O'Connor
## NA' in 'mbscsToSbcs': dot substituted for <80>
```

```
## Warning in text.default(...): conversion failure on '40 2018 Parker LM, O'Connor
## NA' in 'mbscsToSbcs': dot substituted for <99>
```

```
## Warning: Ratio of largest to smallest sampling variance extremely large. May not
## be able to obtain stable results.
```

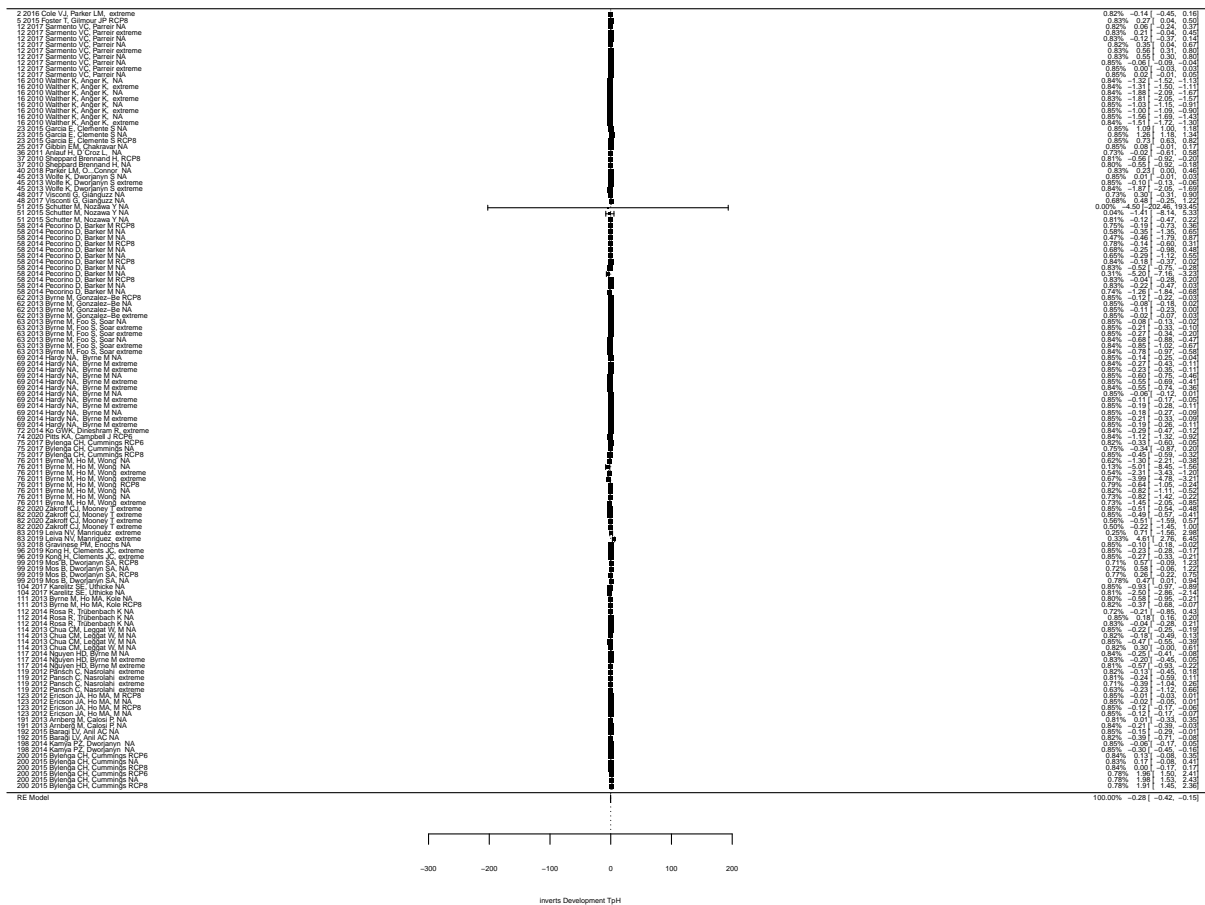

```
Abs_InvertDev <- MA_TpH_abs("inverts","Development", Inverts)
```

## Warning: Ratio of largest to smallest sampling variance extremely large. May not be able to obtain stable results.

```
## Fish, Development
FishDev <- MA_TpH("fish","Development", Fish,sensitivity)
```

```
##
## Random-Effects Model (k = 19; tau^2 estimator: REML)
##
## tau^2 (estimated amount of total heterogeneity): 0.1014 (SE = 0.0348)
## tau (square root of estimated tau^2 value): 0.3185
## I^2 (total heterogeneity / total variability): 99.57%
## H^2 (total variability / sampling variability): 232.54
##
## Test for Heterogeneity:
## Q(df = 18) = 2632.5175, p-val < .0001
##
```

```

## Model Results:
##
## estimate      se      zval      pval      ci.lb      ci.ub
## -0.2365  0.0742  -3.1876  0.0014  -0.3819  -0.0911  **
##
## ---
## Signif. codes:  0 '***' 0.001 '**' 0.01 '*' 0.05 '.' 0.1 ' ' 1

```

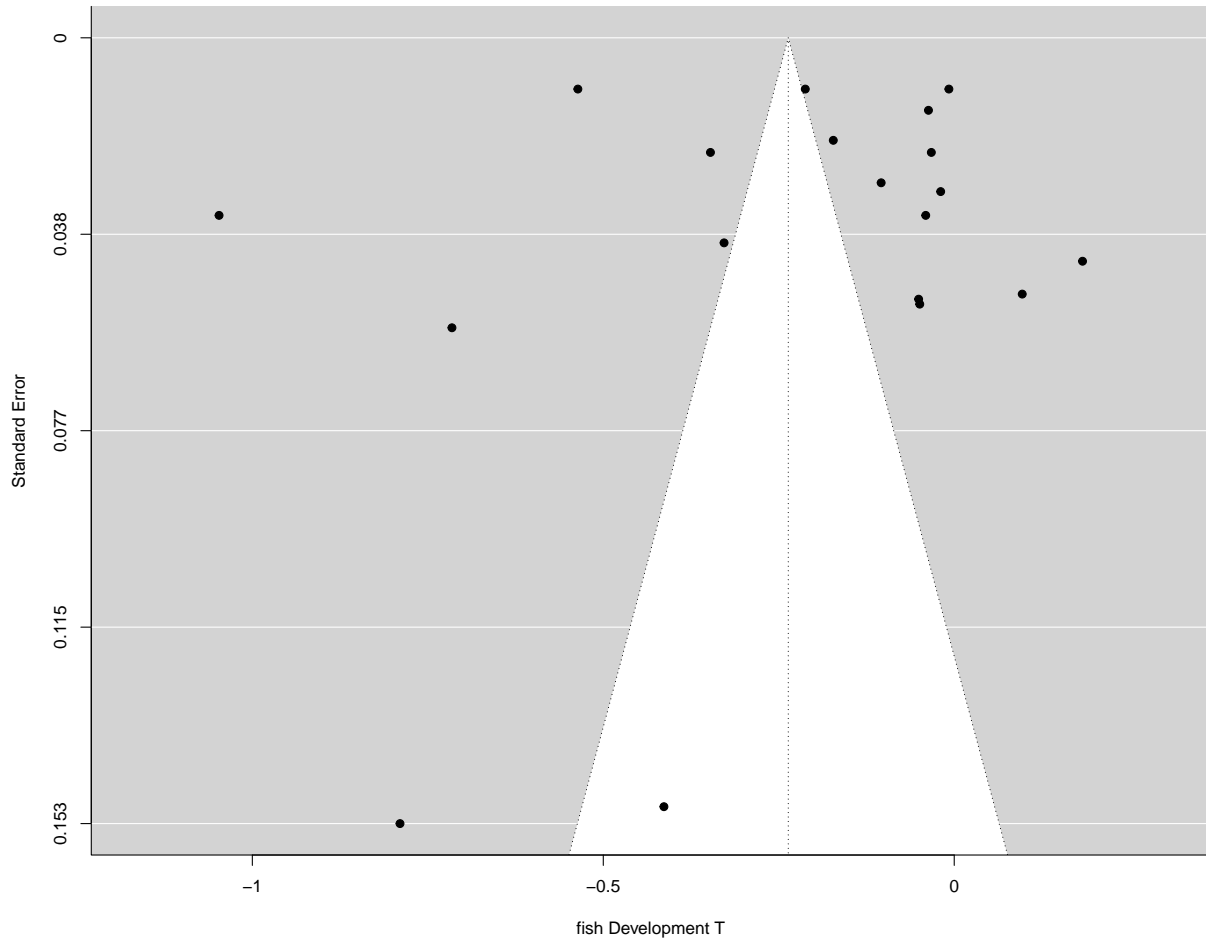

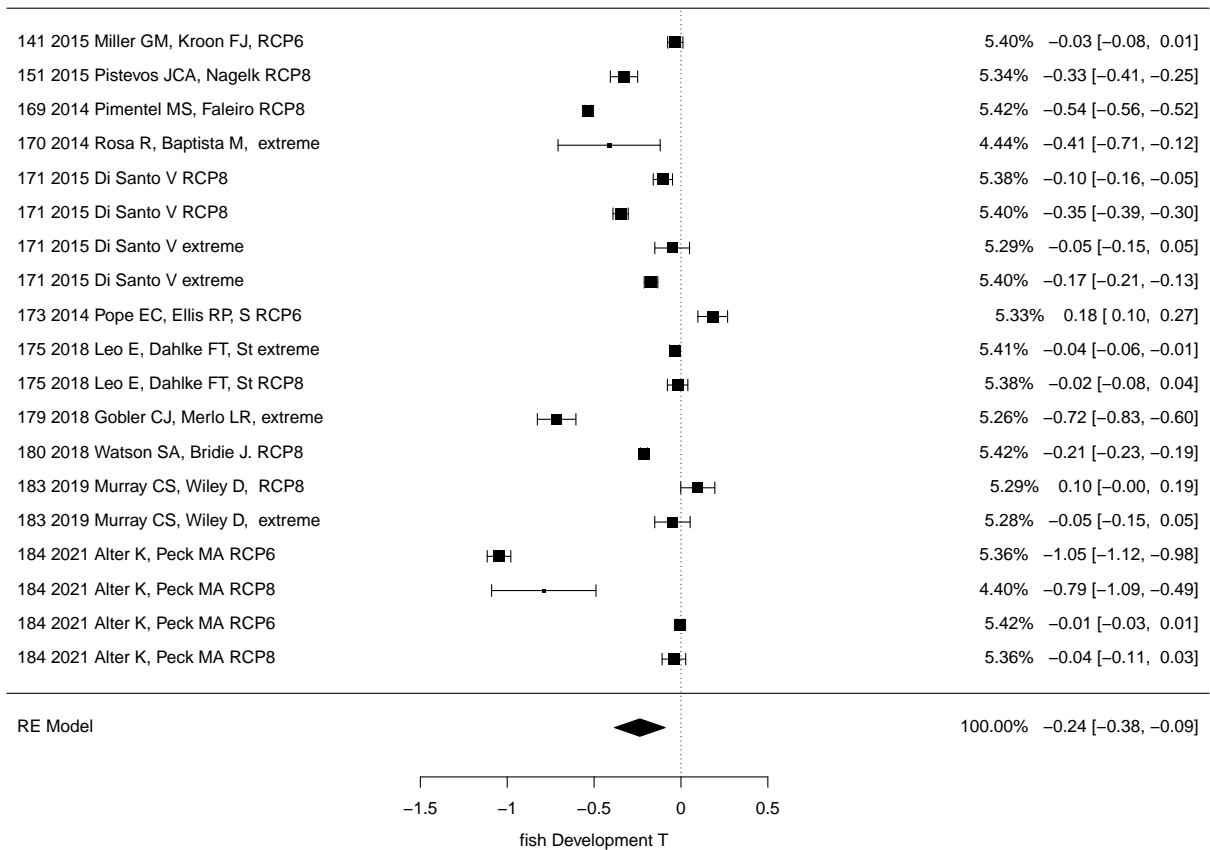

```

##
## Random-Effects Model (k = 15; tau^2 estimator: REML)
##
## tau^2 (estimated amount of total heterogeneity): 0.0660 (SE = 0.0262)
## tau (square root of estimated tau^2 value):      0.2570
## I^2 (total heterogeneity / total variability):   99.27%
## H^2 (total variability / sampling variability):  136.14
##
## Test for Heterogeneity:
## Q(df = 14) = 4690.1818, p-val < .0001
##
## Model Results:
##
## estimate      se      zval      pval      ci.lb      ci.ub
## -0.0714  0.0680  -1.0498  0.2938  -0.2048  0.0619
##
## ---
## Signif. codes:  0 '***' 0.001 '**' 0.01 '*' 0.05 '.' 0.1 ' ' 1

```

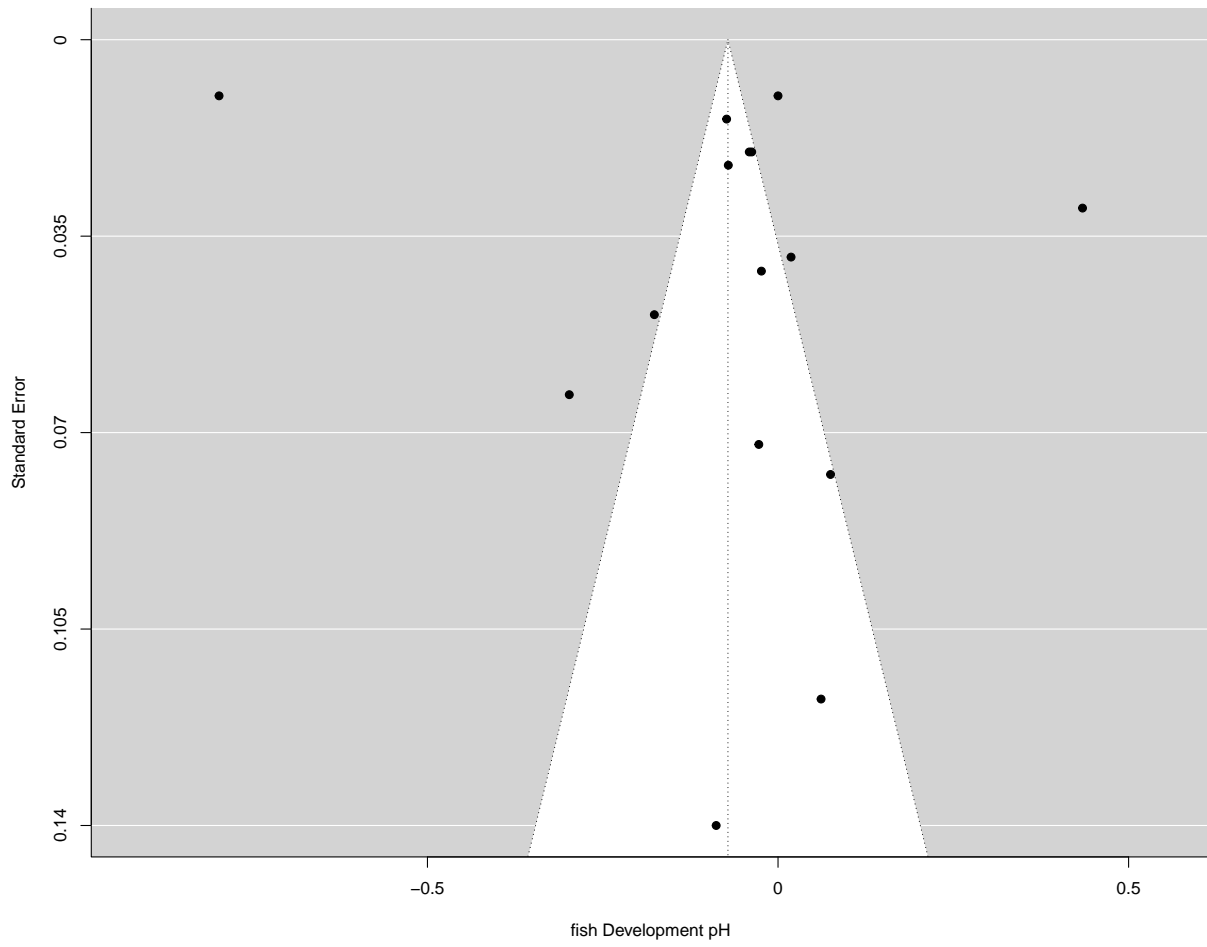

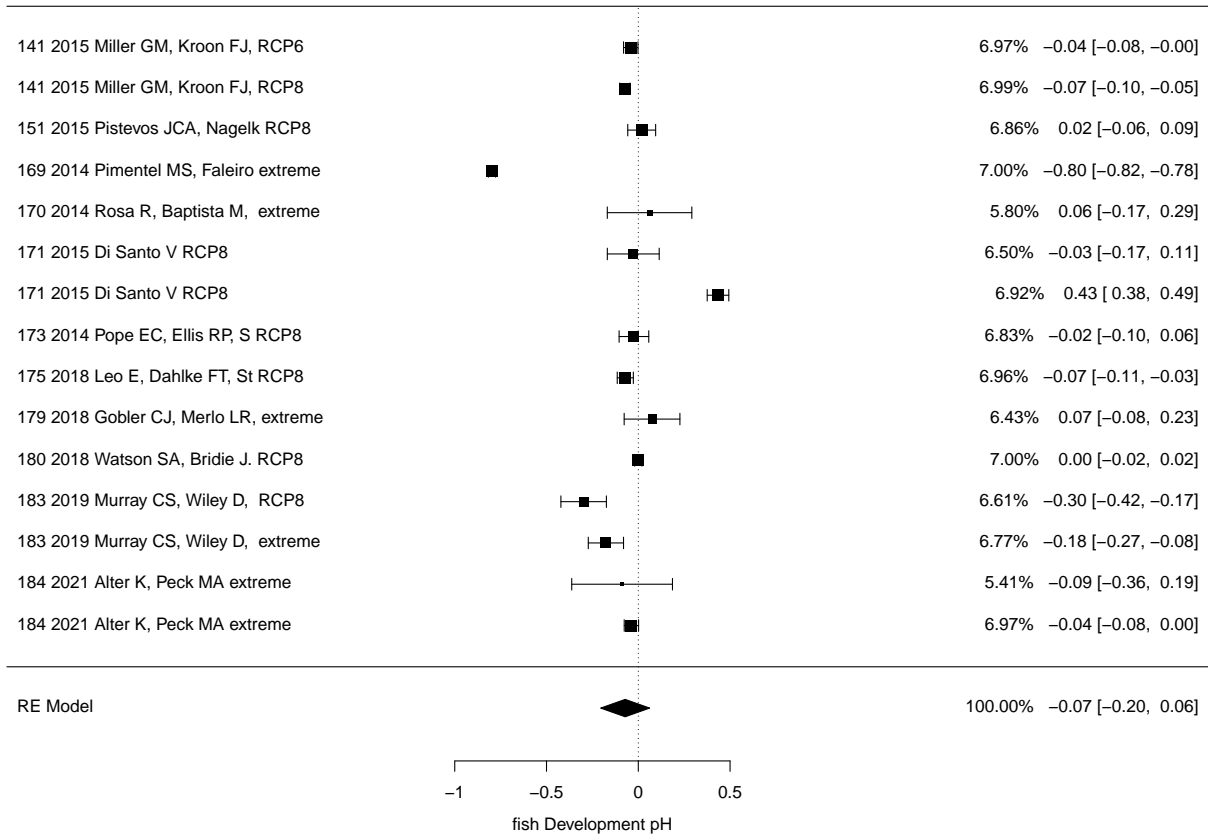

```

##
## Random-Effects Model (k = 21; tau^2 estimator: REML)
##
## tau^2 (estimated amount of total heterogeneity): 0.1722 (SE = 0.0557)
## tau (square root of estimated tau^2 value):      0.4150
## I^2 (total heterogeneity / total variability):   99.62%
## H^2 (total variability / sampling variability):   261.20
##
## Test for Heterogeneity:
## Q(df = 20) = 12571.3841, p-val < .0001
##
## Model Results:
##
## estimate      se      zval      pval      ci.lb      ci.ub
## -0.3266  0.0916  -3.5658  0.0004  -0.5061  -0.1471  ***
##
## ---
## Signif. codes:  0 '***' 0.001 '**' 0.01 '*' 0.05 '.' 0.1 ' ' 1

```

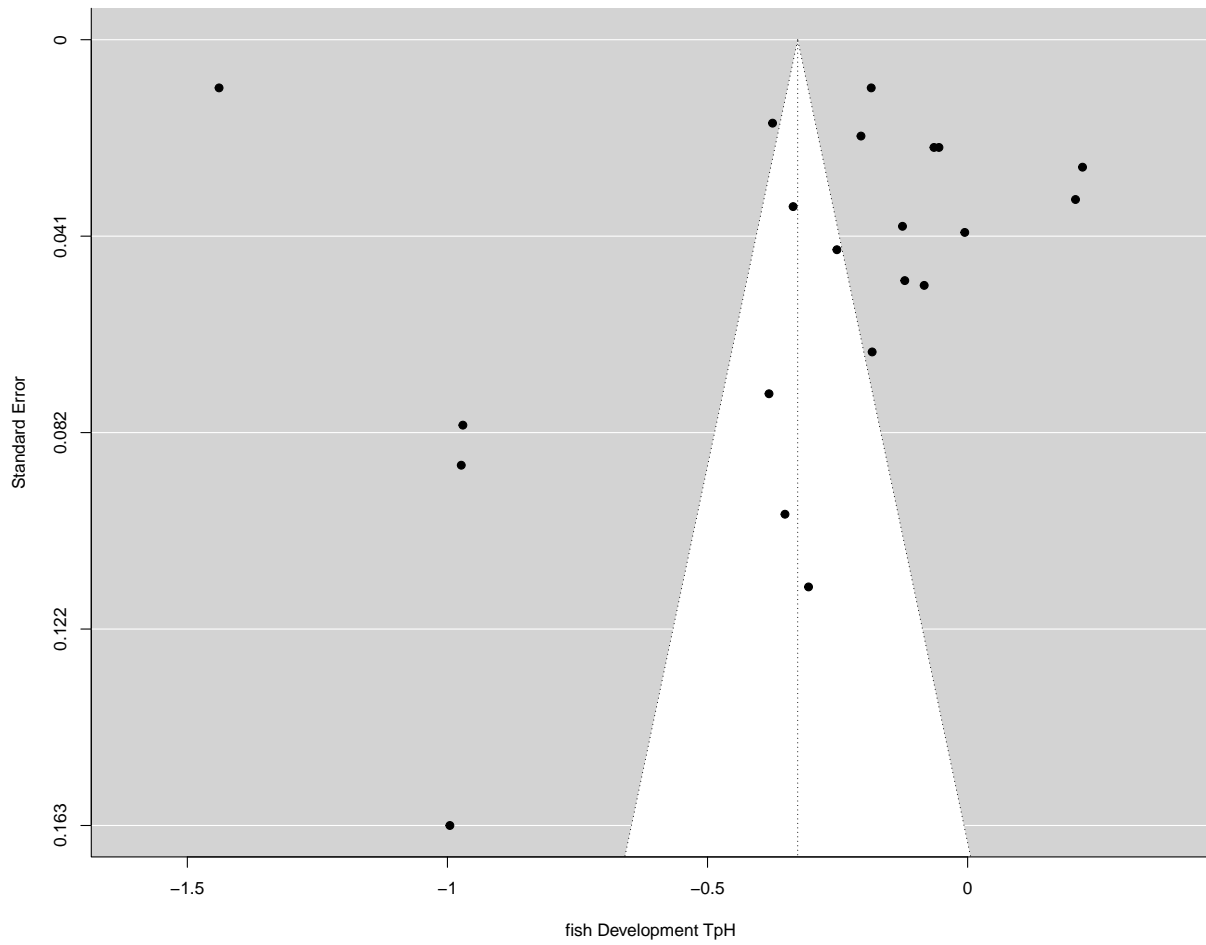

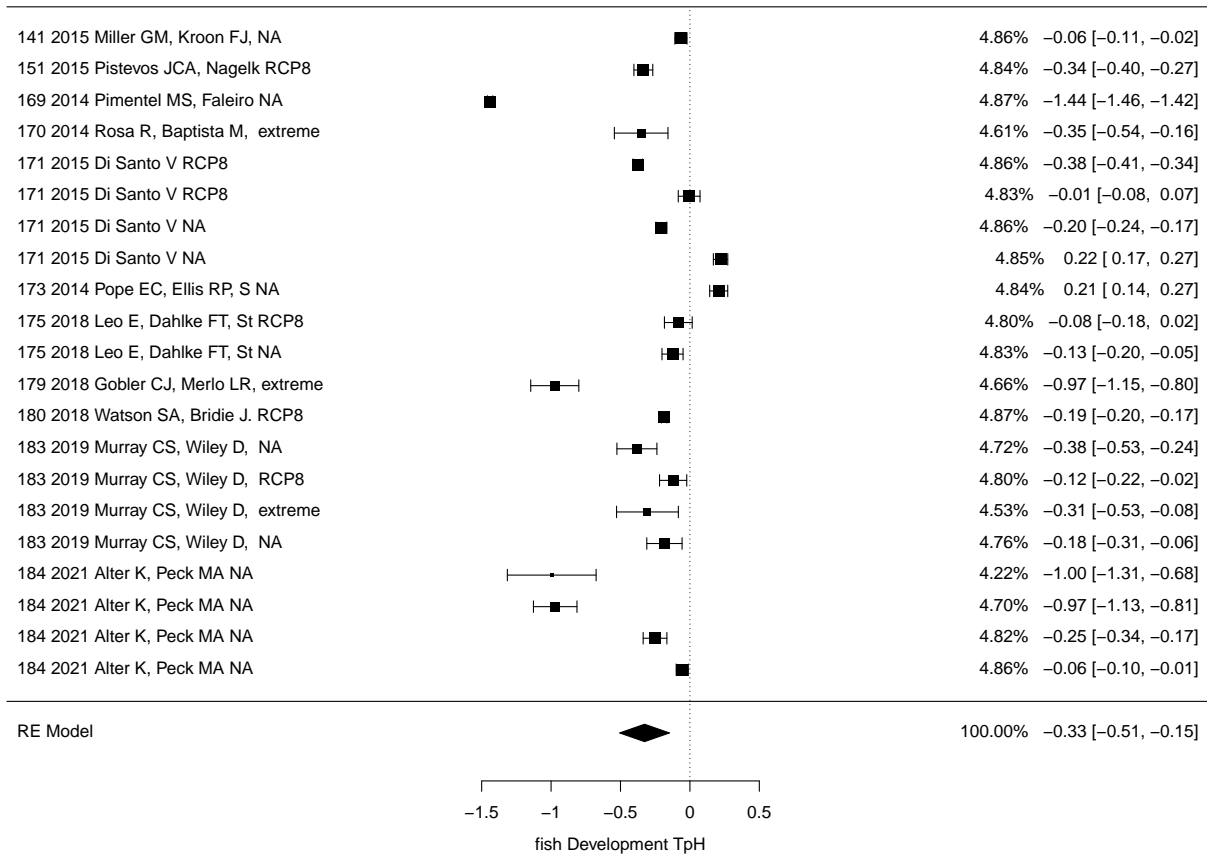

```

Abs_FishDev <- MA_TpH_abs("fish", "Development", Fish)

## Invertebrate, Growth
InvertGrowth <- MA_TpH("inverts", "Growth", Inverts, sensitivity)

##
## Random-Effects Model (k = 92; tau^2 estimator: REML)
##
## tau^2 (estimated amount of total heterogeneity): 0.1034 (SE = 0.0173)
## tau (square root of estimated tau^2 value):      0.3216
## I^2 (total heterogeneity / total variability):   99.18%
## H^2 (total variability / sampling variability):  122.02
##
## Test for Heterogeneity:
## Q(df = 91) = 1579.8303, p-val < .0001
##
## Model Results:
##
## estimate      se      zval      pval      ci.lb      ci.ub
## -0.0153      0.0360     -0.4260     0.6701     -0.0859     0.0552

```

```
##
## ---
## Signif. codes:  0 '***' 0.001 '**' 0.01 '*' 0.05 '.' 0.1 ' ' 1
```

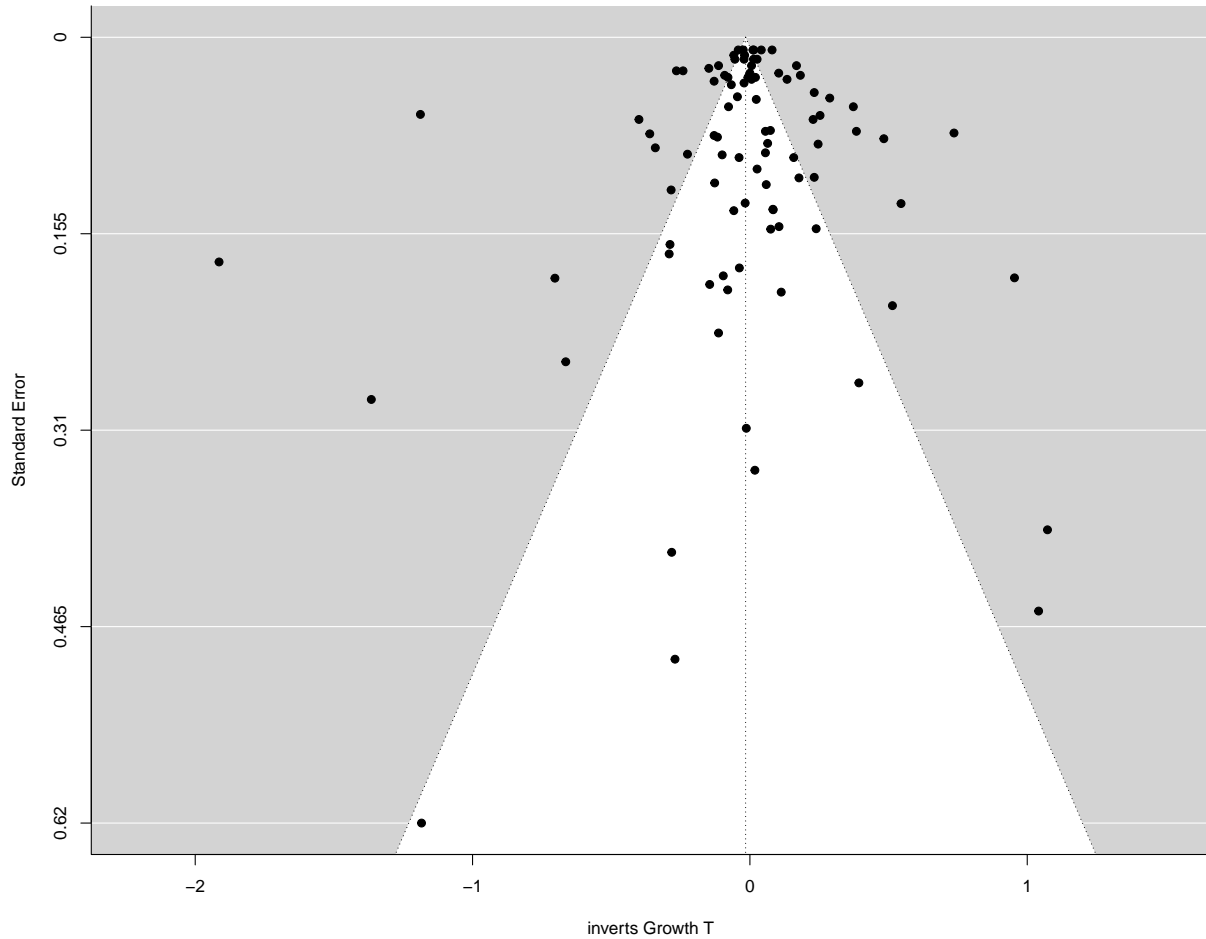

```
## Warning in text.default(...): conversion failure on '40 2018 Parker LM, O'Connor
## extreme' in 'mbscsToSbcs': dot substituted for <e2>
```

```
## Warning in text.default(...): conversion failure on '40 2018 Parker LM, O'Connor
## extreme' in 'mbscsToSbcs': dot substituted for <80>
```

```
## Warning in text.default(...): conversion failure on '40 2018 Parker LM, O'Connor
## extreme' in 'mbscsToSbcs': dot substituted for <99>
```

```
## Warning in text.default(...): conversion failure on '40 2018 Parker LM, O'Connor
## extreme' in 'mbscsToSbcs': dot substituted for <e2>
```

```
## Warning in text.default(...): conversion failure on '40 2018 Parker LM, O'Connor
## extreme' in 'mbscsToSbcs': dot substituted for <80>
```

```
## Warning in text.default(...): conversion failure on '40 2018 Parker LM, O'Connor
## extreme' in 'mbscsToSbcs': dot substituted for <99>
```

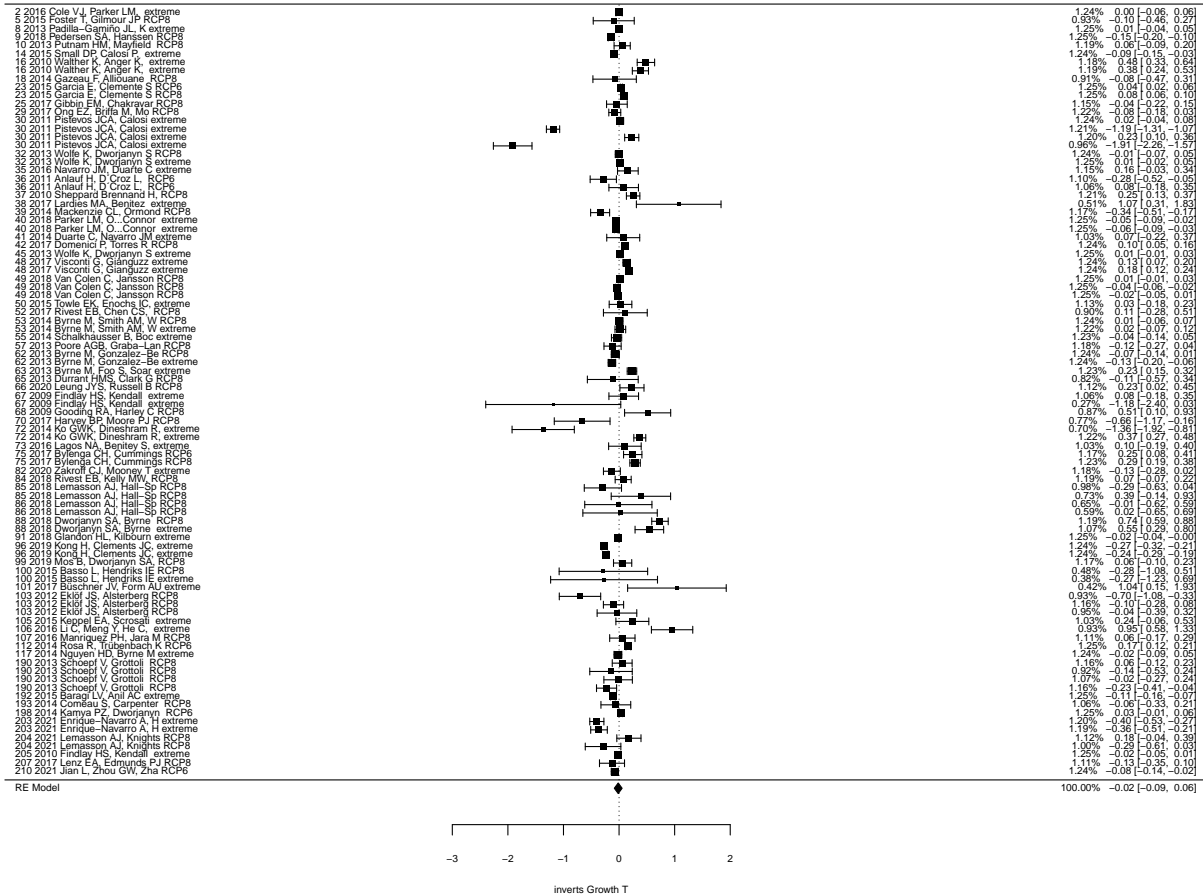

```
##
## Random-Effects Model (k = 124; tau^2 estimator: REML)
##
## tau^2 (estimated amount of total heterogeneity): 0.0524 (SE = 0.0079)
## tau (square root of estimated tau^2 value): 0.2289
## I^2 (total heterogeneity / total variability): 98.66%
## H^2 (total variability / sampling variability): 74.78
##
## Test for Heterogeneity:
## Q(df = 123) = 2658.0458, p-val < .0001
##
## Model Results:
##
## estimate se zval pval ci.lb ci.ub
## -0.0880 0.0228 -3.8597 0.0001 -0.1327 -0.0433 ***
##
## ---
```

## Signif. codes: 0 '\*\*\*' 0.001 '\*\*' 0.01 '\*' 0.05 '.' 0.1 ' ' 1

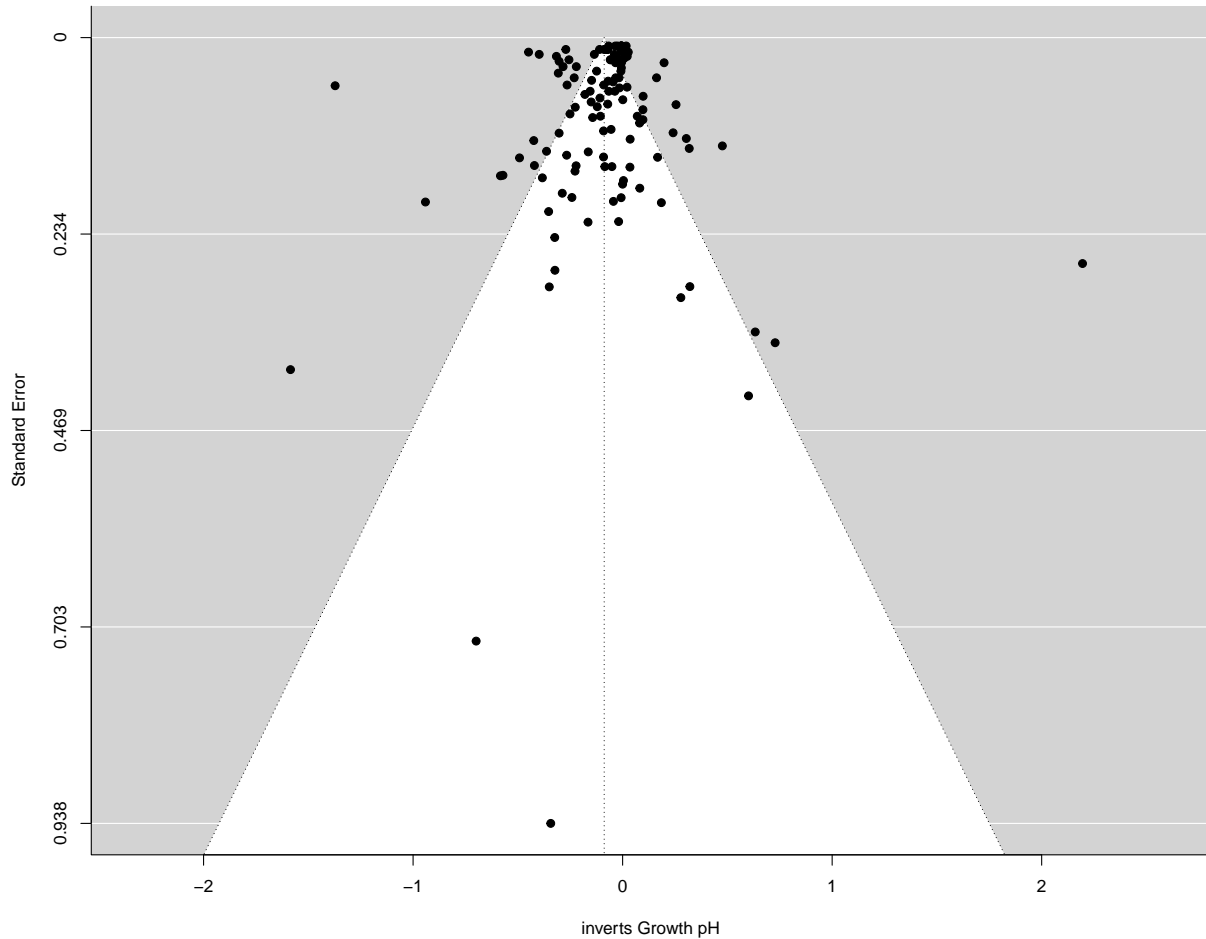

## Warning in text.default(...): conversion failure on '40 2018 Parker LM, O'Connor  
## RCP8' in 'mbscsToSbcs': dot substituted for <e2>

## Warning in text.default(...): conversion failure on '40 2018 Parker LM, O'Connor  
## RCP8' in 'mbscsToSbcs': dot substituted for <80>

## Warning in text.default(...): conversion failure on '40 2018 Parker LM, O'Connor  
## RCP8' in 'mbscsToSbcs': dot substituted for <99>

## Warning in text.default(...): conversion failure on '40 2018 Parker LM, O'Connor  
## RCP8' in 'mbscsToSbcs': dot substituted for <e2>

## Warning in text.default(...): conversion failure on '40 2018 Parker LM, O'Connor  
## RCP8' in 'mbscsToSbcs': dot substituted for <80>

## Warning in text.default(...): conversion failure on '40 2018 Parker LM, O'Connor  
## RCP8' in 'mbscsToSbcs': dot substituted for <99>

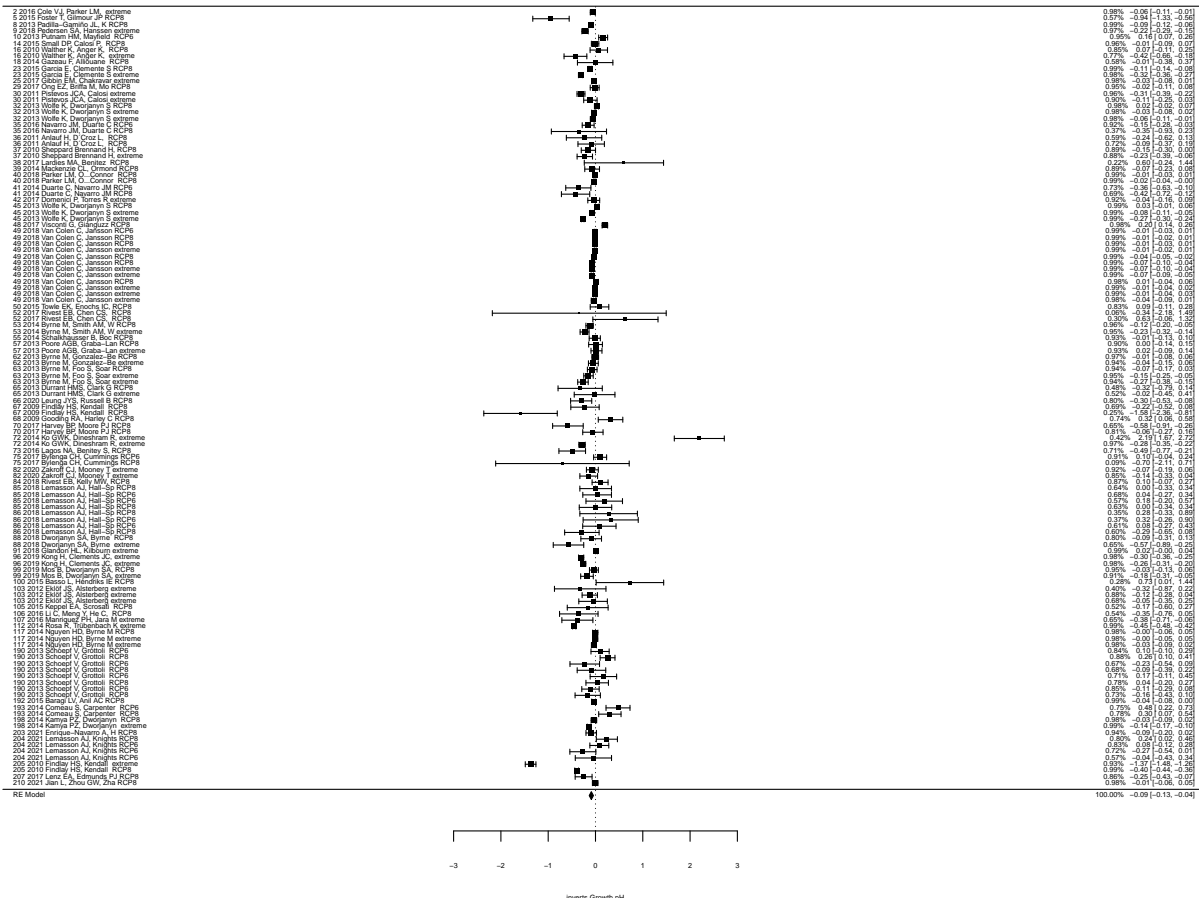

```

##
## Random-Effects Model (k = 148; tau^2 estimator: REML)
##
## tau^2 (estimated amount of total heterogeneity): 0.1394 (SE = 0.0177)
## tau (square root of estimated tau^2 value):      0.3734
## I^2 (total heterogeneity / total variability):   99.40%
## H^2 (total variability / sampling variability):  165.90
##
## Test for Heterogeneity:
## Q(df = 147) = 5006.4575, p-val < .0001
##
## Model Results:
##
## estimate      se      zval      pval      ci.lb      ci.ub
## -0.0975  0.0322  -3.0277  0.0025  -0.1607  -0.0344  **
##
## ---
## Signif. codes:  0 '***' 0.001 '**' 0.01 '*' 0.05 '.' 0.1 ' ' 1

```

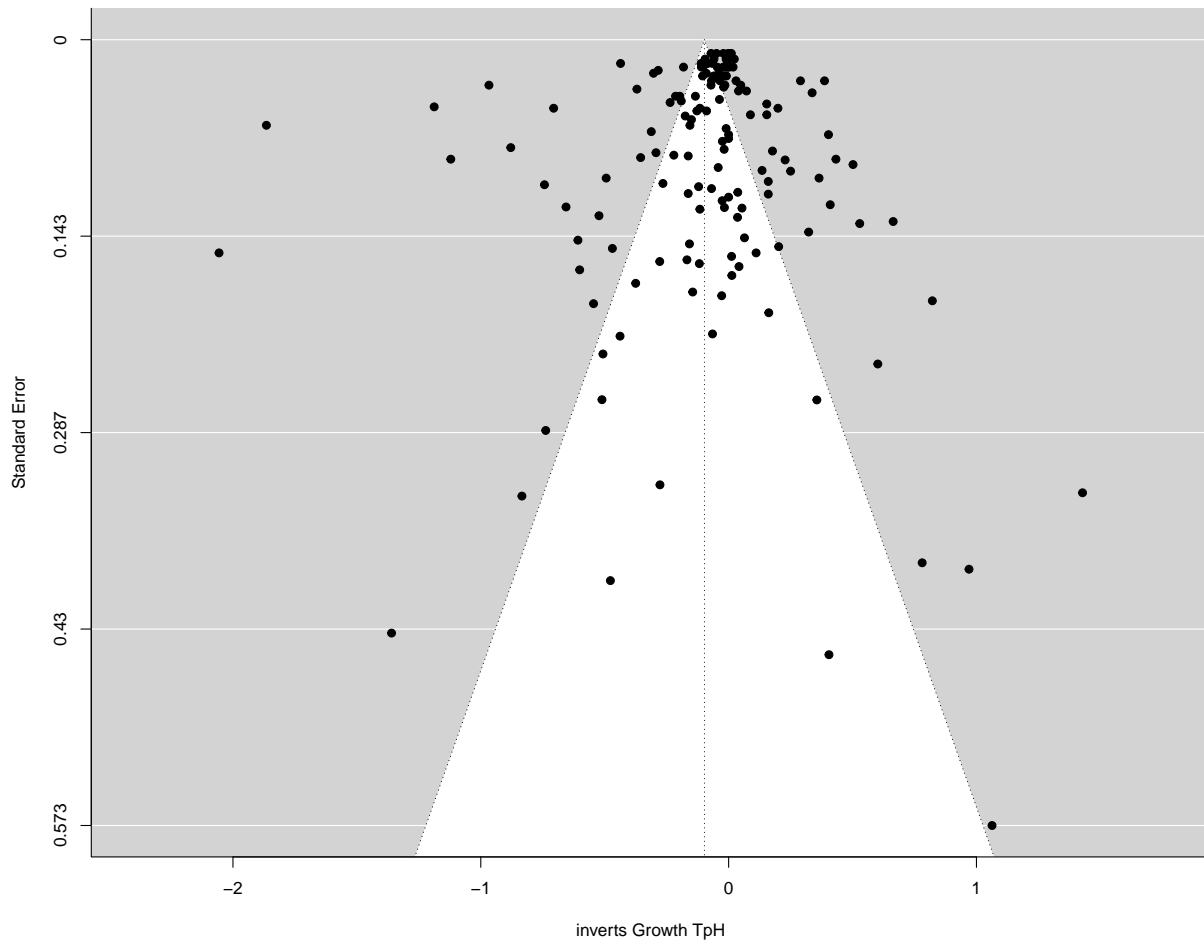

```
## Warning in text.default(...): conversion failure on '40 2018 Parker LM, O'Connor
## NA' in 'mbscsToSbcs': dot substituted for <e2>
```

```
## Warning in text.default(...): conversion failure on '40 2018 Parker LM, O'Connor
## NA' in 'mbscsToSbcs': dot substituted for <80>
```

```
## Warning in text.default(...): conversion failure on '40 2018 Parker LM, O'Connor
## NA' in 'mbscsToSbcs': dot substituted for <99>
```

```
## Warning in text.default(...): conversion failure on '40 2018 Parker LM, O'Connor
## NA' in 'mbscsToSbcs': dot substituted for <e2>
```

```
## Warning in text.default(...): conversion failure on '40 2018 Parker LM, O'Connor
## NA' in 'mbscsToSbcs': dot substituted for <80>
```

```
## Warning in text.default(...): conversion failure on '40 2018 Parker LM, O'Connor
## NA' in 'mbscsToSbcs': dot substituted for <99>
```

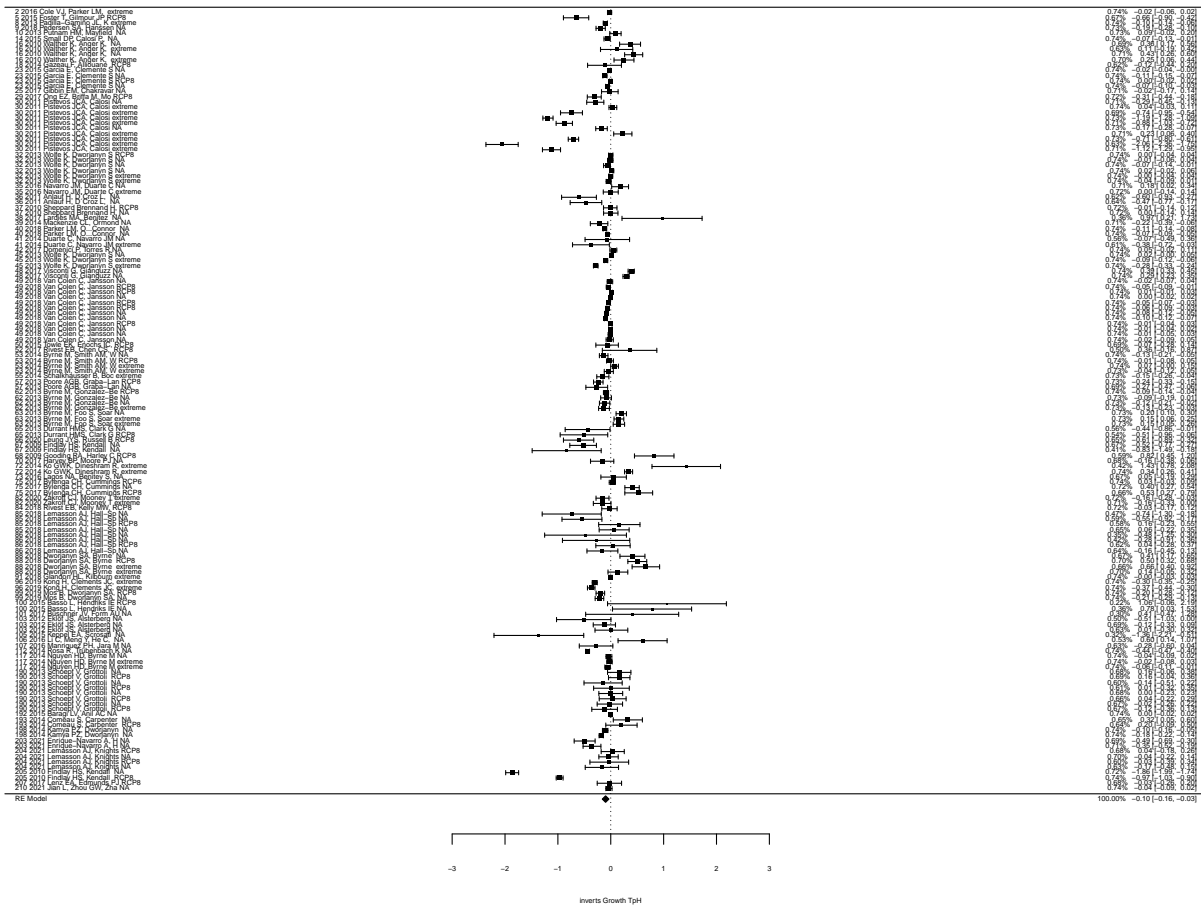

```
Abs_InvertGrowth <- MA_TpH_abs("inverts","Growth", Inverts)
```

```
##Fish, Growth
```

```
FishGrowth <- MA_TpH("fish","Growth", Fish,sensitivity)
```

```
## Warning: Fisher scoring algorithm may have gotten stuck at a local maximum.
## Setting tau^2 = 0. Check the profile likelihood plot with profile().
```

```
##
```

```
## Random-Effects Model (k = 60; tau^2 estimator: REML)
```

```
##
```

```
## tau^2 (estimated amount of total heterogeneity): 0.0910 (SE = 0.0185)
```

```
## tau (square root of estimated tau^2 value): 0.3017
```

```
## I^2 (total heterogeneity / total variability): 99.45%
```

```
## H^2 (total variability / sampling variability): 182.24
```

```
##
```

```
## Test for Heterogeneity:
```

```
## Q(df = 59) = 3230.4106, p-val < .0001
```

```
##
```

```
## Model Results:
```

```

##
## estimate      se    zval    pval    ci.lb    ci.ub
## 0.0749 0.0413 1.8108 0.0702 -0.0062 0.1559 .
##
## ---
## Signif. codes:  0 '***' 0.001 '**' 0.01 '*' 0.05 '.' 0.1 ' ' 1

```

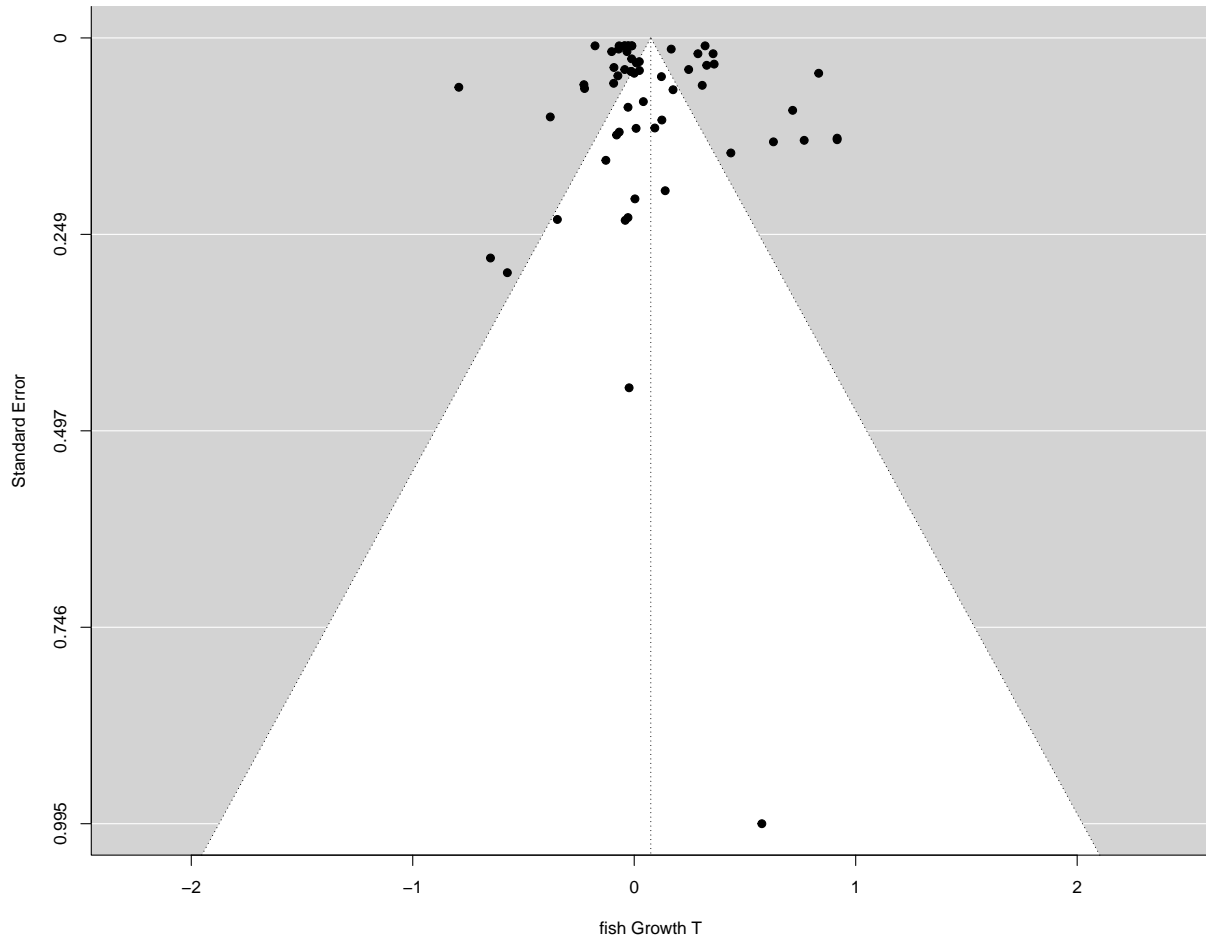

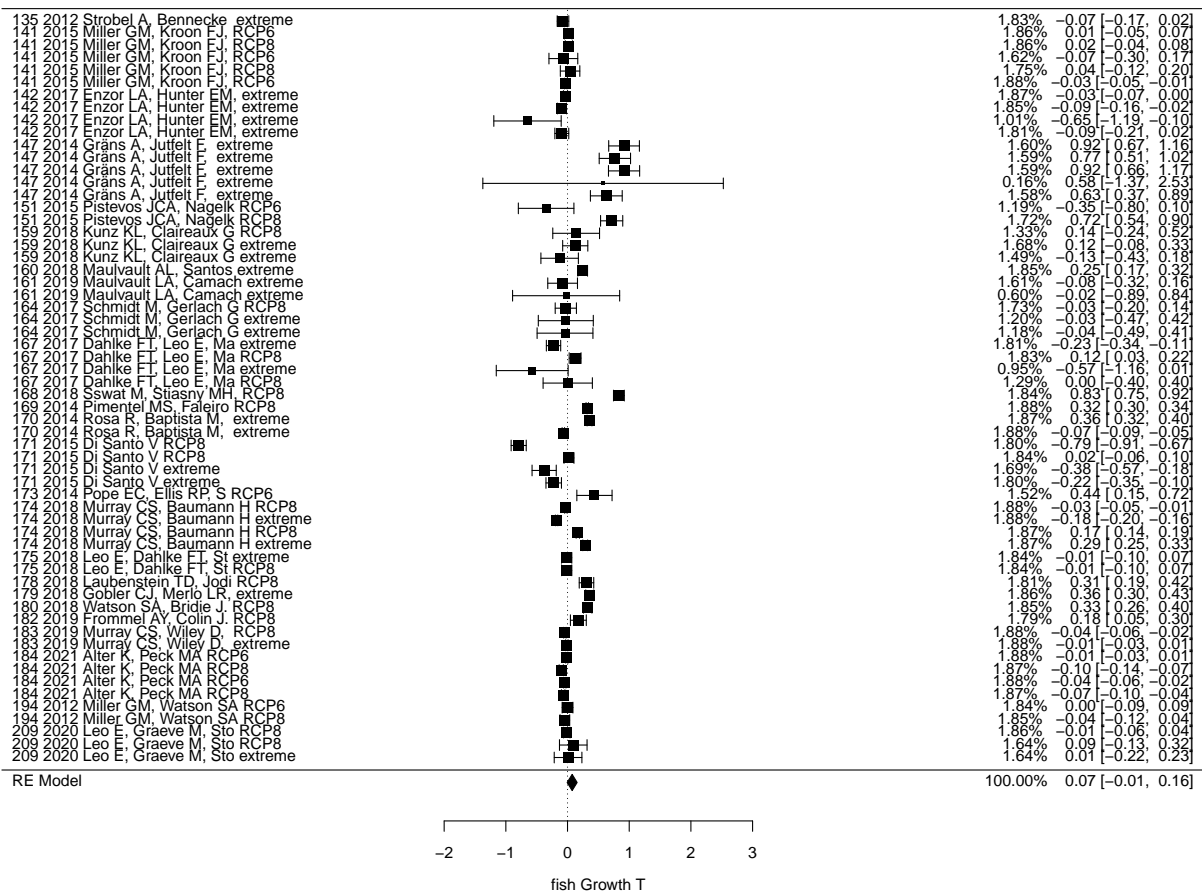

```

##
## Random-Effects Model (k = 46; tau^2 estimator: REML)
##
## tau^2 (estimated amount of total heterogeneity): 0.0159 (SE = 0.0042)
## tau (square root of estimated tau^2 value): 0.1261
## I^2 (total heterogeneity / total variability): 97.73%
## H^2 (total variability / sampling variability): 44.11
##
## Test for Heterogeneity:
## Q(df = 45) = 1113.9392, p-val < .0001
##
## Model Results:
##
## estimate se zval pval ci.lb ci.ub
## -0.0460 0.0218 -2.1160 0.0343 -0.0887 -0.0034 *
##
## ---
## Signif. codes: 0 '***' 0.001 '**' 0.01 '*' 0.05 '.' 0.1 ' ' 1

```



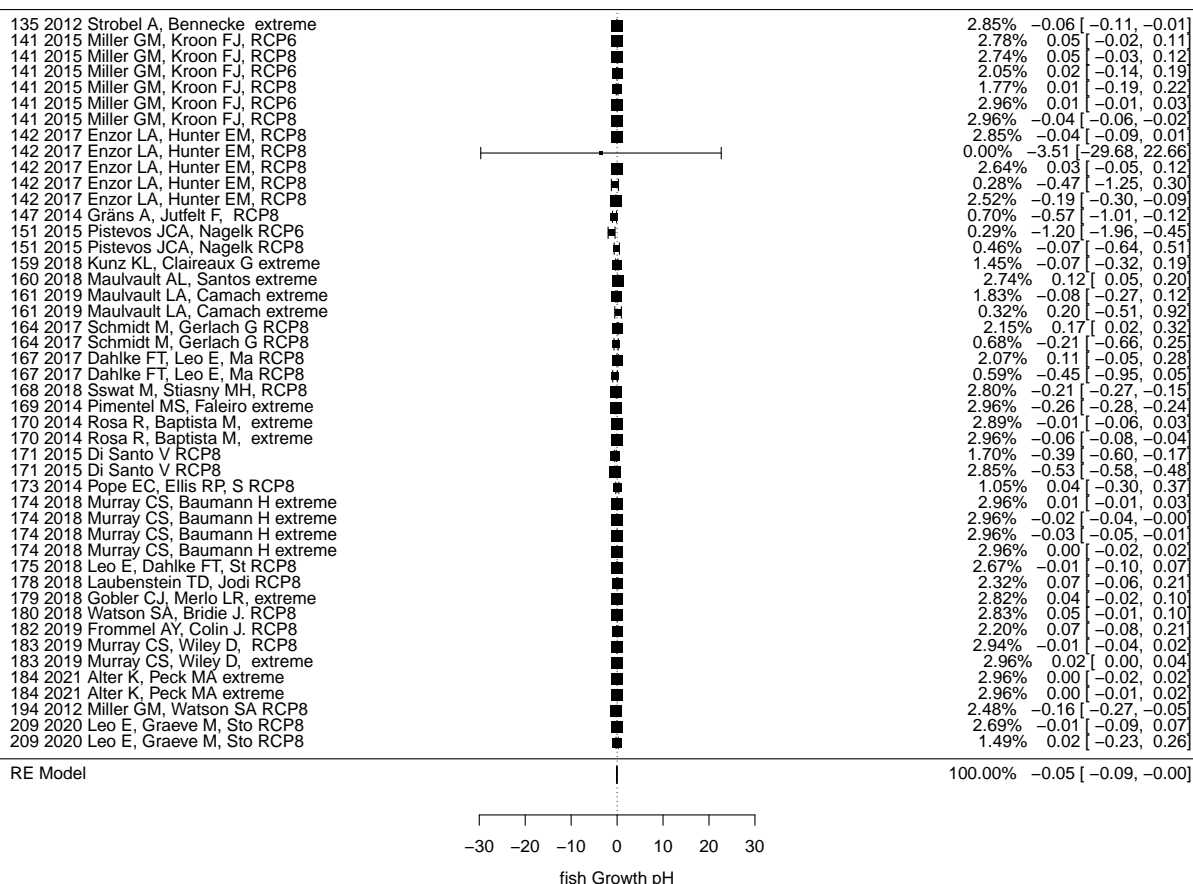

```

##
## Random-Effects Model (k = 70; tau^2 estimator: REML)
##
## tau^2 (estimated amount of total heterogeneity): 0.0968 (SE = 0.0181)
## tau (square root of estimated tau^2 value):      0.3111
## I^2 (total heterogeneity / total variability):   99.50%
## H^2 (total variability / sampling variability):  199.98
##
## Test for Heterogeneity:
## Q(df = 69) = 3426.5911, p-val < .0001
##
## Model Results:
##
## estimate      se      zval      pval      ci.lb      ci.ub
## 0.0410 0.0393 1.0439 0.2965 -0.0360 0.1181
##
## ---
## Signif. codes:  0 '***' 0.001 '**' 0.01 '*' 0.05 '.' 0.1 ' ' 1

```

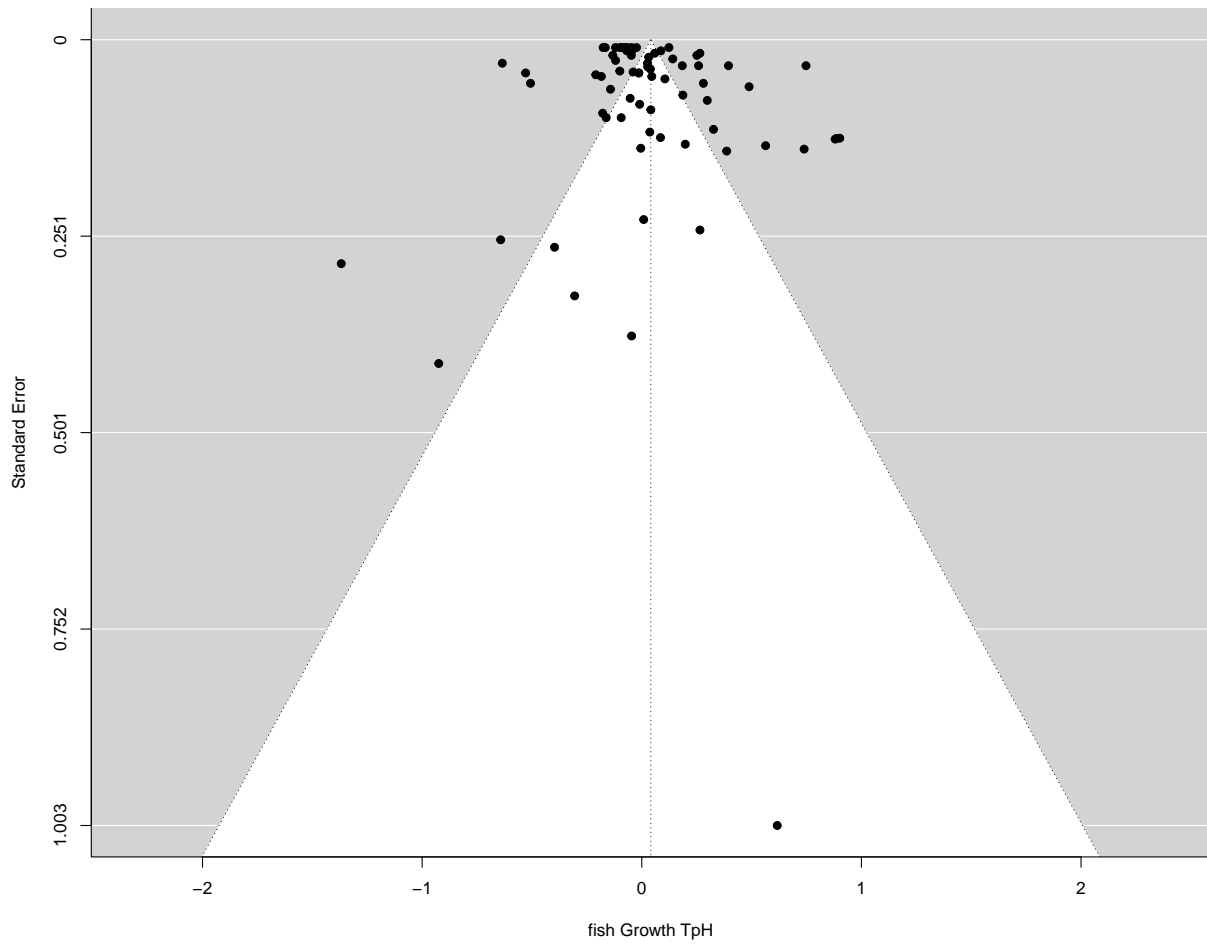

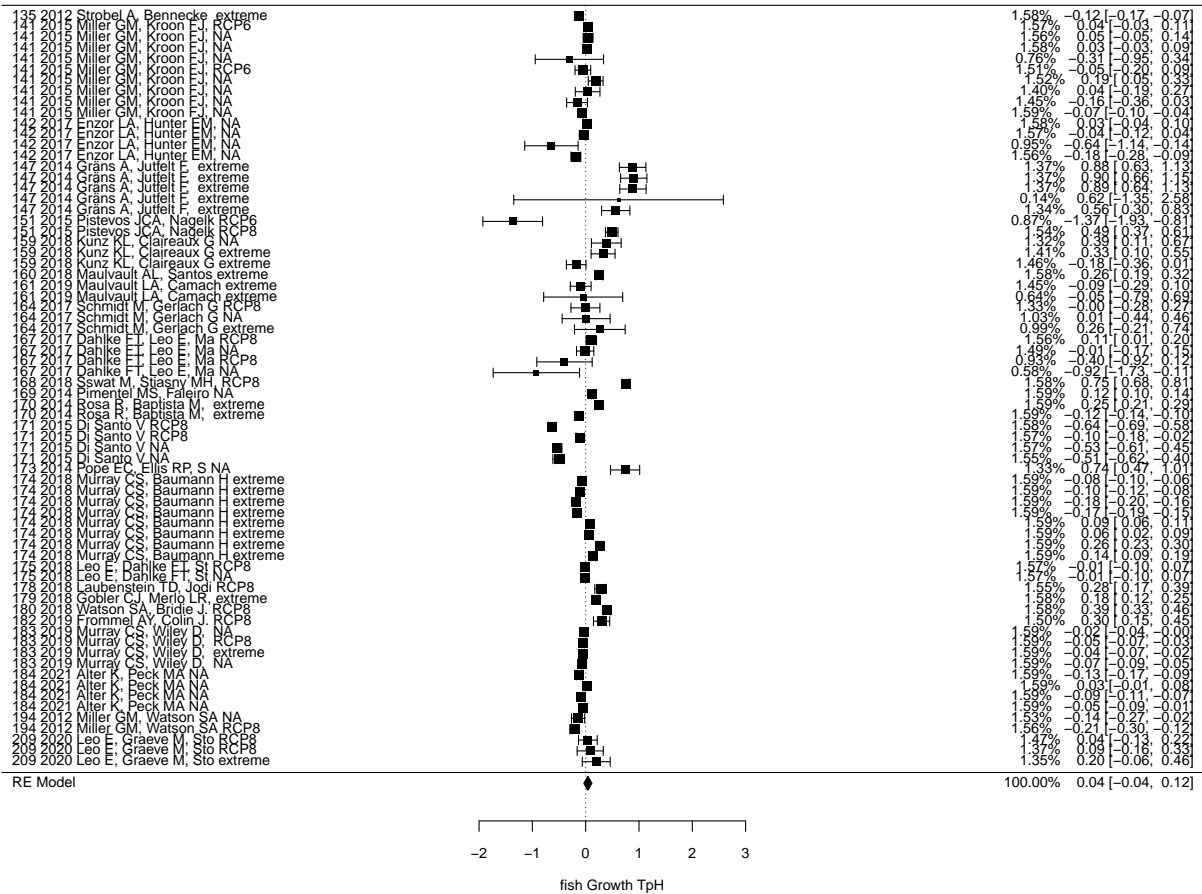

```

Abs_FishGrowth <- MA_TpH_abs("fish","Growth", Fish)

## Invertebrate, Physiology
InvertPhys <- MA_TpH("inverts","Physiology", Inverts,sensitivity)

##
## Random-Effects Model (k = 77; tau^2 estimator: REML)
##
## tau^2 (estimated amount of total heterogeneity): 0.2768 (SE = 0.0500)
## tau (square root of estimated tau^2 value): 0.5261
## I^2 (total heterogeneity / total variability): 99.69%
## H^2 (total variability / sampling variability): 323.66
##
## Test for Heterogeneity:
## Q(df = 76) = 2229.1894, p-val < .0001
##
## Model Results:
##
## estimate se zval pval ci.lb ci.ub
## -0.0823 0.0638 -1.2895 0.1972 -0.2074 0.0428

```

```
##
## ---
## Signif. codes:  0 '***' 0.001 '**' 0.01 '*' 0.05 '.' 0.1 ' ' 1
```

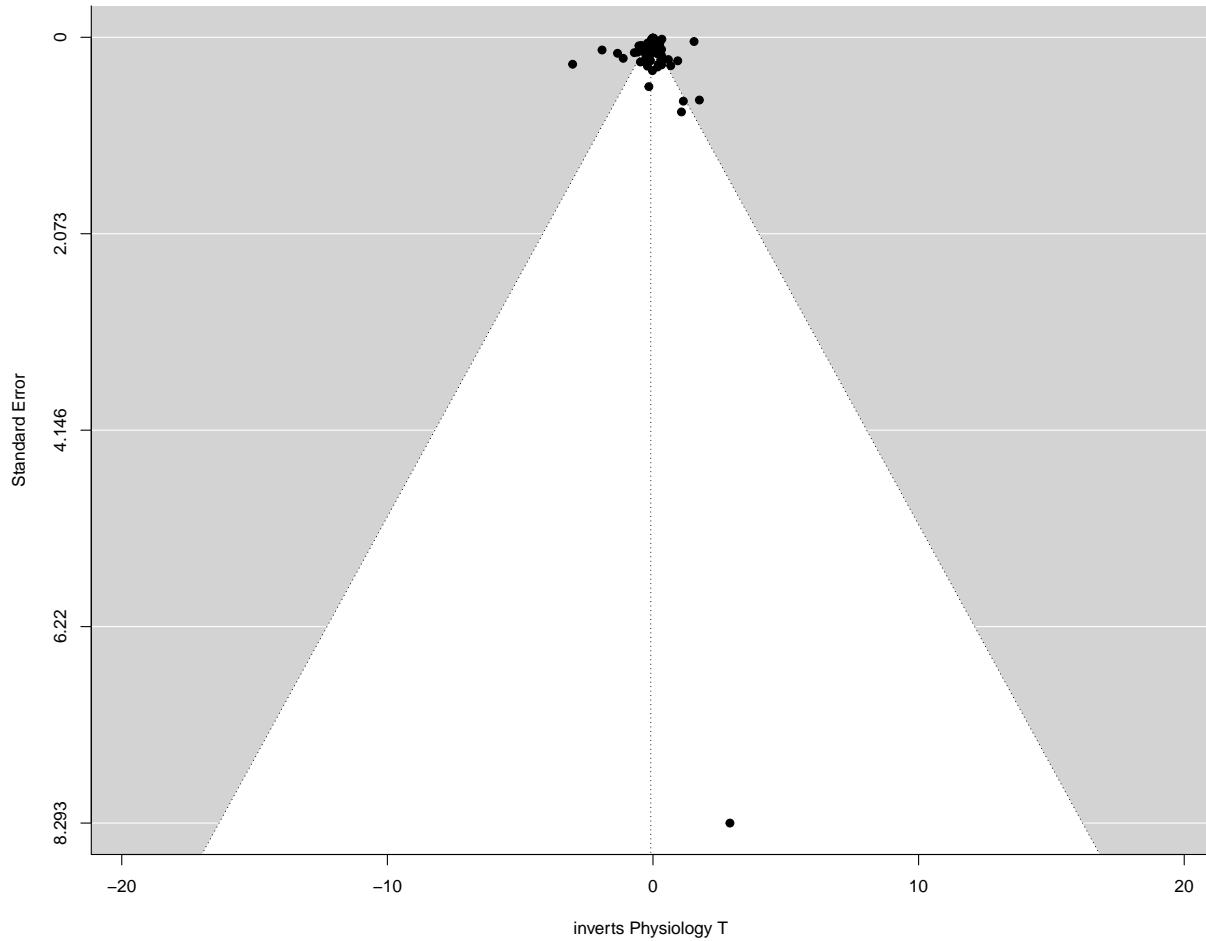

```
## Warning in text.default(...): conversion failure on '40 2018 Parker LM, O'Connor
## extreme' in 'mbscsToSbcs': dot substituted for <e2>
```

```
## Warning in text.default(...): conversion failure on '40 2018 Parker LM, O'Connor
## extreme' in 'mbscsToSbcs': dot substituted for <80>
```

```
## Warning in text.default(...): conversion failure on '40 2018 Parker LM, O'Connor
## extreme' in 'mbscsToSbcs': dot substituted for <99>
```

```
## Warning in text.default(...): conversion failure on '40 2018 Parker LM, O'Connor
## extreme' in 'mbscsToSbcs': dot substituted for <e2>
```

```
## Warning in text.default(...): conversion failure on '40 2018 Parker LM, O'Connor
## extreme' in 'mbscsToSbcs': dot substituted for <80>
```



```

##
## Test for Heterogeneity:
## Q(df = 81) = 1861.8240, p-val < .0001
##
## Model Results:
##
## estimate      se      zval      pval      ci.lb      ci.ub
## -0.0169  0.0501  -0.3370  0.7361  -0.1150  0.0813
##
## ---
## Signif. codes:  0 '***' 0.001 '**' 0.01 '*' 0.05 '.' 0.1 ' ' 1

```

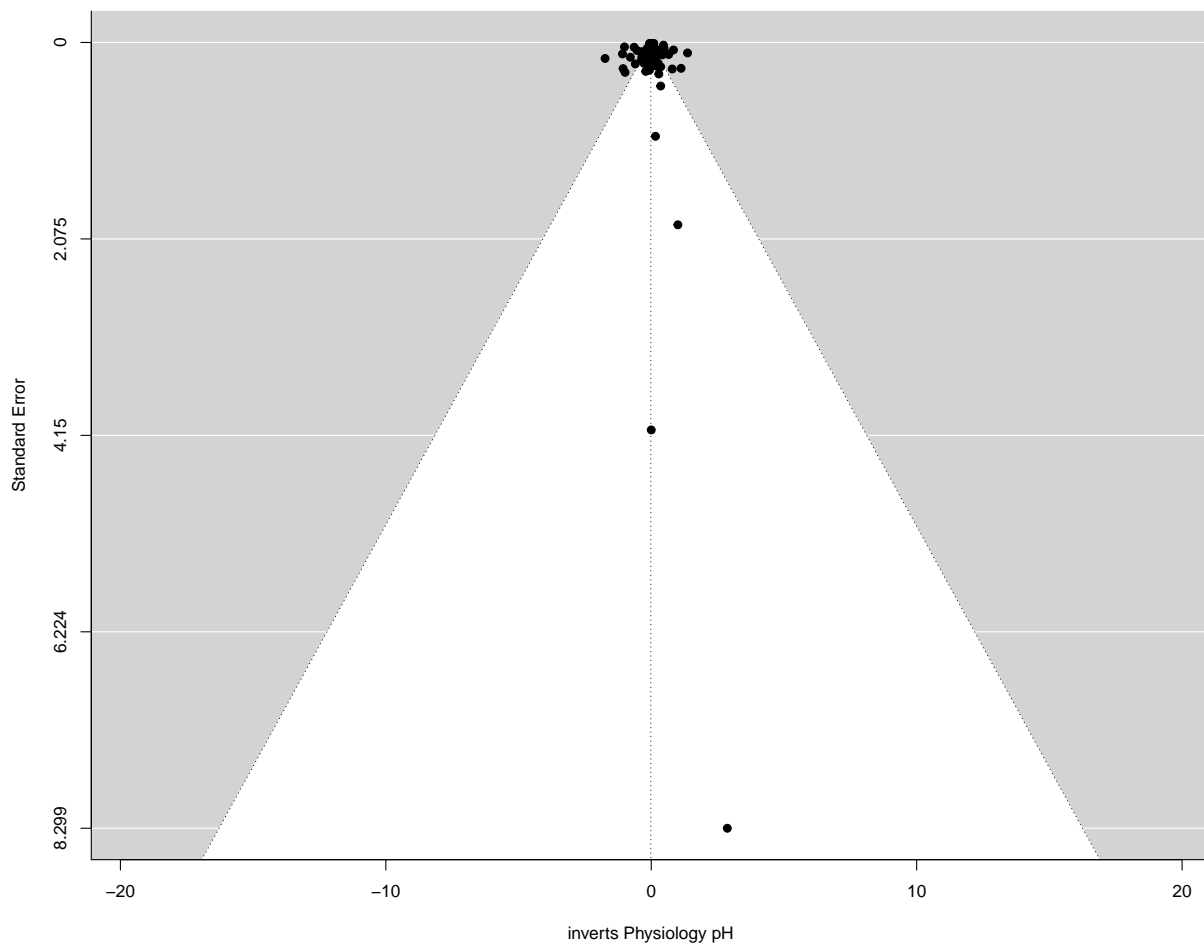

```

## Warning in text.default(...): conversion failure on '40 2018 Parker LM, O'Connor
## RCP8' in 'mbscsToSbcs': dot substituted for <e2>

```

```

## Warning in text.default(...): conversion failure on '40 2018 Parker LM, O'Connor
## RCP8' in 'mbscsToSbcs': dot substituted for <80>

```

```

## Warning in text.default(...): conversion failure on '40 2018 Parker LM, O'Connor
## RCP8' in 'mbscsToSbcs': dot substituted for <99>

```



```

##
## Random-Effects Model (k = 94; tau^2 estimator: REML)
##
## tau^2 (estimated amount of total heterogeneity): 0.2726 (SE = 0.0454)
## tau (square root of estimated tau^2 value):      0.5221
## I^2 (total heterogeneity / total variability):   99.70%
## H^2 (total variability / sampling variability):  332.79
##
## Test for Heterogeneity:
## Q(df = 93) = 2565.6087, p-val < .0001
##
## Model Results:
##
## estimate      se      zval      pval      ci.lb      ci.ub
## -0.0356  0.0581  -0.6124  0.5403  -0.1496  0.0784
##
## ---
## Signif. codes:  0 '***' 0.001 '**' 0.01 '*' 0.05 '.' 0.1 ' ' 1

```

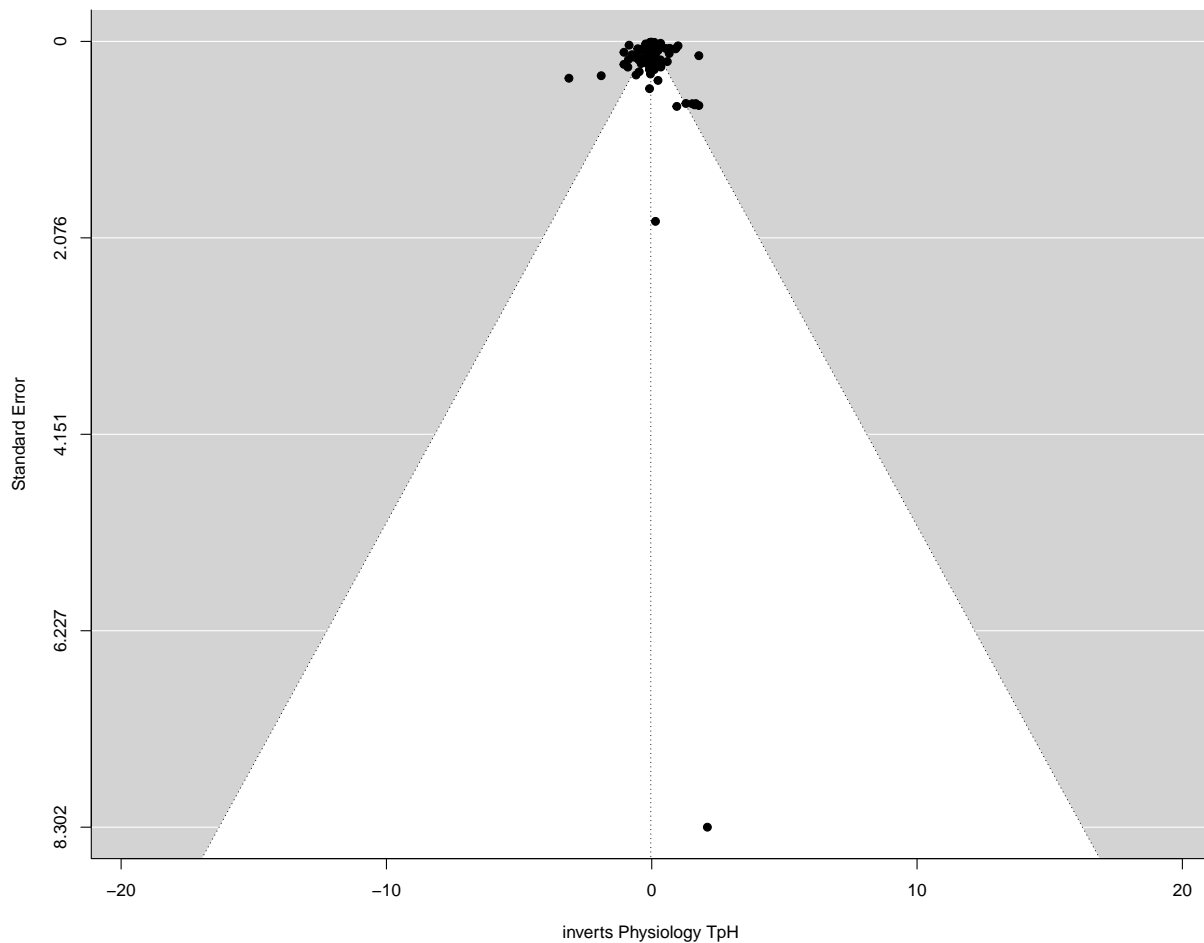

```
## Warning in text.default(...): conversion failure on '40 2018 Parker LM, O'Connor
```

```
## NA' in 'mbsToSbcs': dot substituted for <e2>

## Warning in text.default(...): conversion failure on '40 2018 Parker LM, O'Connor
## NA' in 'mbsToSbcs': dot substituted for <80>

## Warning in text.default(...): conversion failure on '40 2018 Parker LM, O'Connor
## NA' in 'mbsToSbcs': dot substituted for <99>

## Warning in text.default(...): conversion failure on '40 2018 Parker LM, O'Connor
## NA' in 'mbsToSbcs': dot substituted for <e2>

## Warning in text.default(...): conversion failure on '40 2018 Parker LM, O'Connor
## NA' in 'mbsToSbcs': dot substituted for <80>

## Warning in text.default(...): conversion failure on '40 2018 Parker LM, O'Connor
## NA' in 'mbsToSbcs': dot substituted for <99>

## Warning in text.default(...): conversion failure on '40 2018 Parker LM, O'Connor
## NA' in 'mbsToSbcs': dot substituted for <e2>

## Warning in text.default(...): conversion failure on '40 2018 Parker LM, O'Connor
## NA' in 'mbsToSbcs': dot substituted for <80>

## Warning in text.default(...): conversion failure on '40 2018 Parker LM, O'Connor
## NA' in 'mbsToSbcs': dot substituted for <99>
```

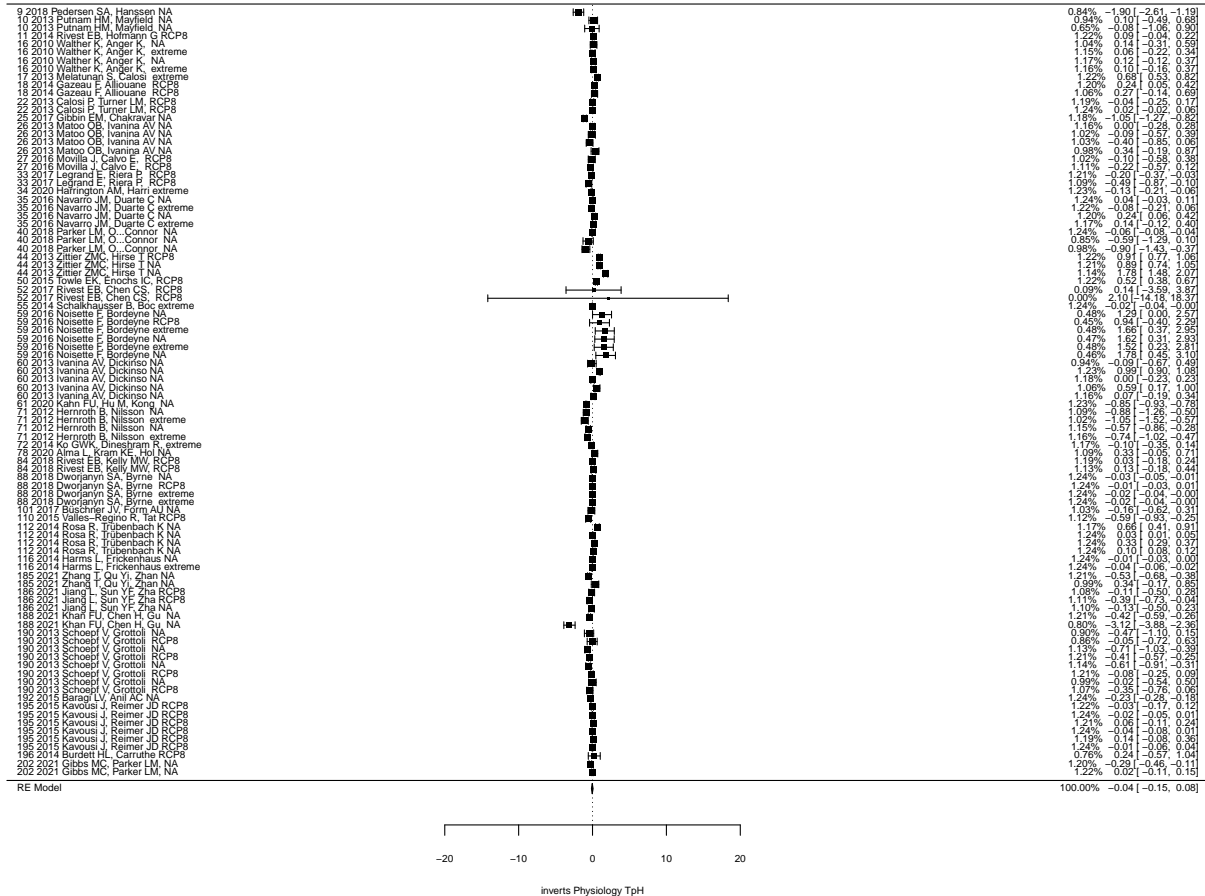

```
Abs_InvertPhys <- MA_TpH_abs("inverts","Physiology", Inverts)
```

```
## Fish, Physiology
```

```
FishPhys <- MA_TpH("fish","Physiology", Fish,sensitivity)
```

```
##
## Random-Effects Model (k = 66; tau^2 estimator: REML)
##
## tau^2 (estimated amount of total heterogeneity): 0.0620 (SE = 0.0142)
## tau (square root of estimated tau^2 value): 0.2491
## I^2 (total heterogeneity / total variability): 97.20%
## H^2 (total variability / sampling variability): 35.71
##
## Test for Heterogeneity:
## Q(df = 65) = 832.0468, p-val < .0001
##
## Model Results:
##
## estimate se zval pval ci.lb ci.ub
## 0.0743 0.0359 2.0716 0.0383 0.0040 0.1446 *
```

```
##
## ---
## Signif. codes:  0 '***' 0.001 '**' 0.01 '*' 0.05 '.' 0.1 ' ' 1
```

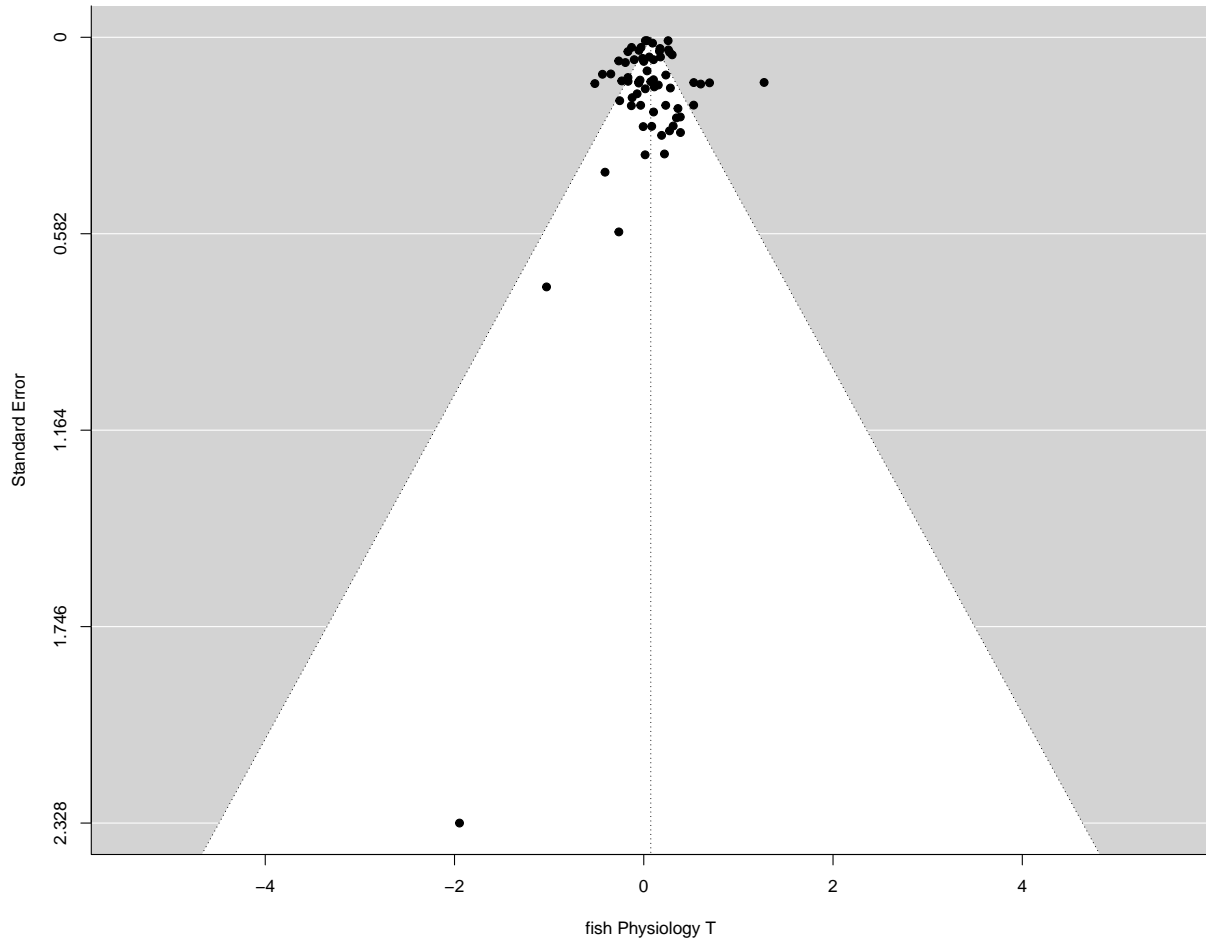

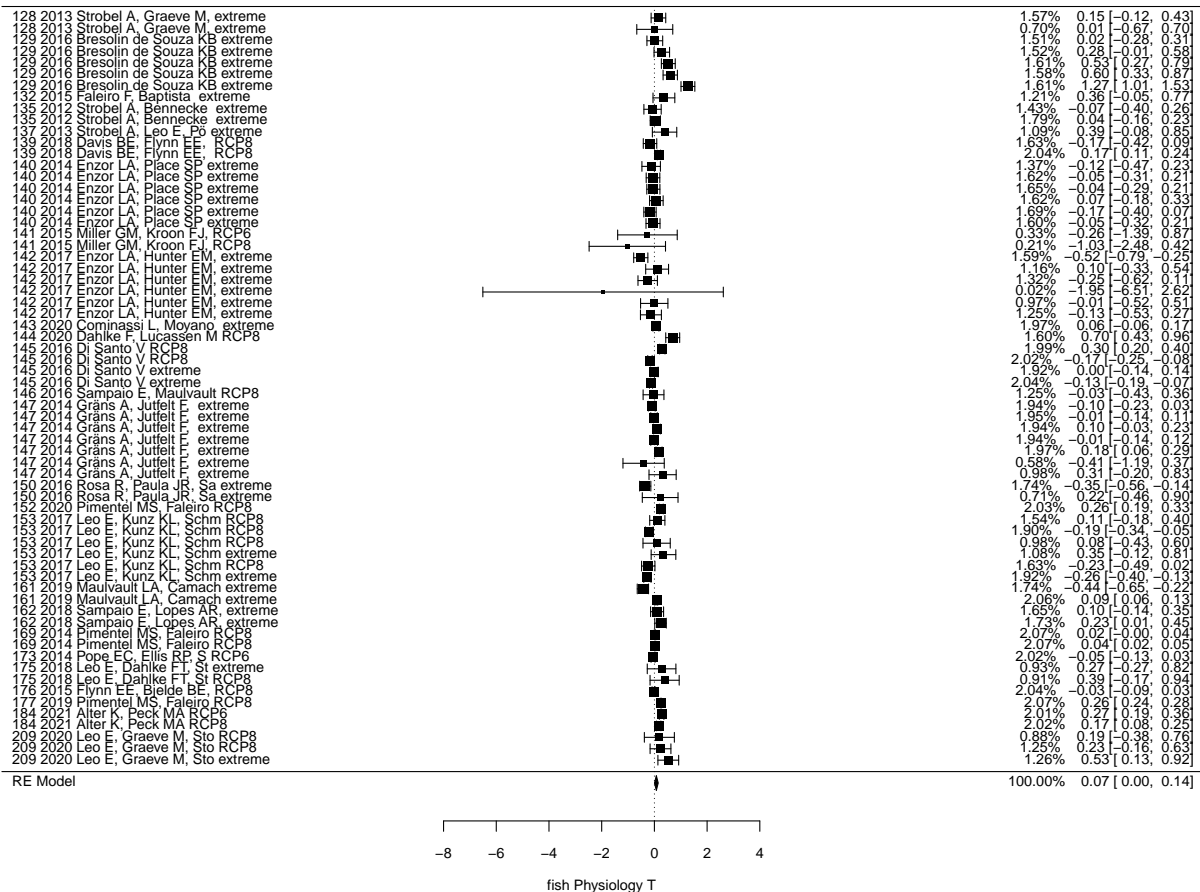

```

##
## Random-Effects Model (k = 53; tau^2 estimator: REML)
##
## tau^2 (estimated amount of total heterogeneity): 0.0157 (SE = 0.0052)
## tau (square root of estimated tau^2 value): 0.1253
## I^2 (total heterogeneity / total variability): 90.15%
## H^2 (total variability / sampling variability): 10.15
##
## Test for Heterogeneity:
## Q(df = 52) = 406.5981, p-val < .0001
##
## Model Results:
##
## estimate se zval pval ci.lb ci.ub
## -0.0276 0.0239 -1.1529 0.2489 -0.0745 0.0193
##
## ---
## Signif. codes: 0 '***' 0.001 '**' 0.01 '*' 0.05 '.' 0.1 ' ' 1

```

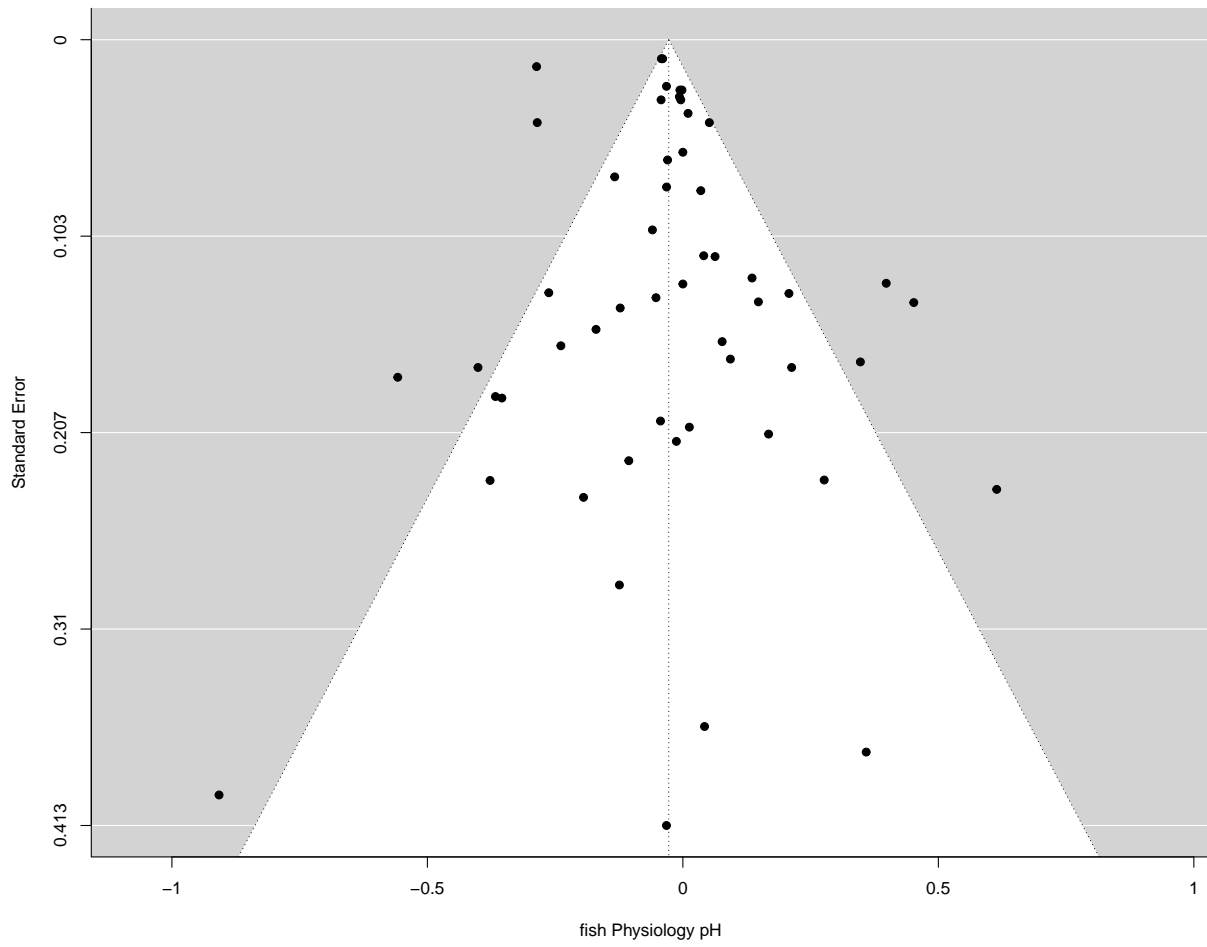

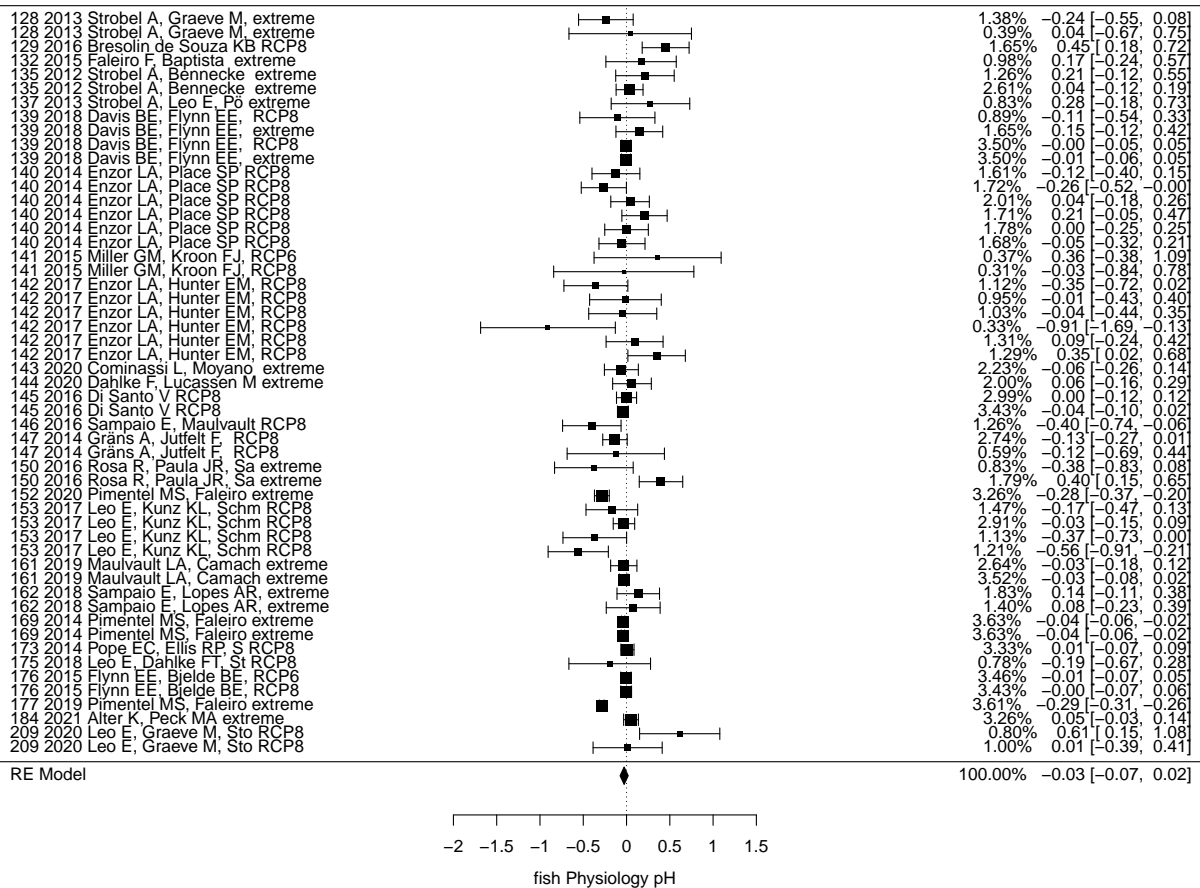

```

##
## Random-Effects Model (k = 70; tau^2 estimator: REML)
##
## tau^2 (estimated amount of total heterogeneity): 0.0987 (SE = 0.0203)
## tau (square root of estimated tau^2 value): 0.3142
## I^2 (total heterogeneity / total variability): 98.08%
## H^2 (total variability / sampling variability): 52.20
##
## Test for Heterogeneity:
## Q(df = 69) = 685.0445, p-val < .0001
##
## Model Results:
##
## estimate se zval pval ci.lb ci.ub
## 0.0396 0.0418 0.9473 0.3435 -0.0424 0.1217
##
## ---
## Signif. codes: 0 '***' 0.001 '**' 0.01 '*' 0.05 '.' 0.1 ' ' 1

```

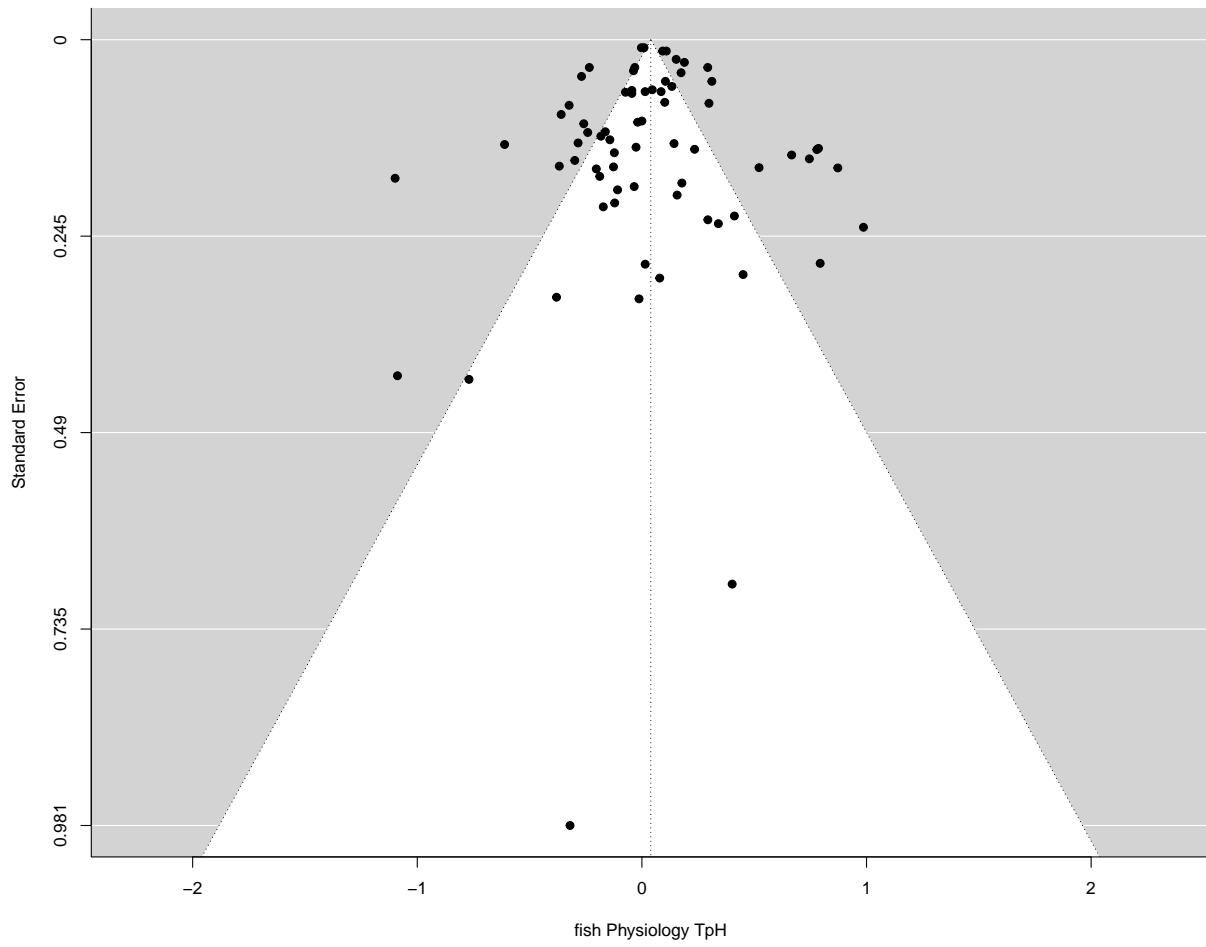

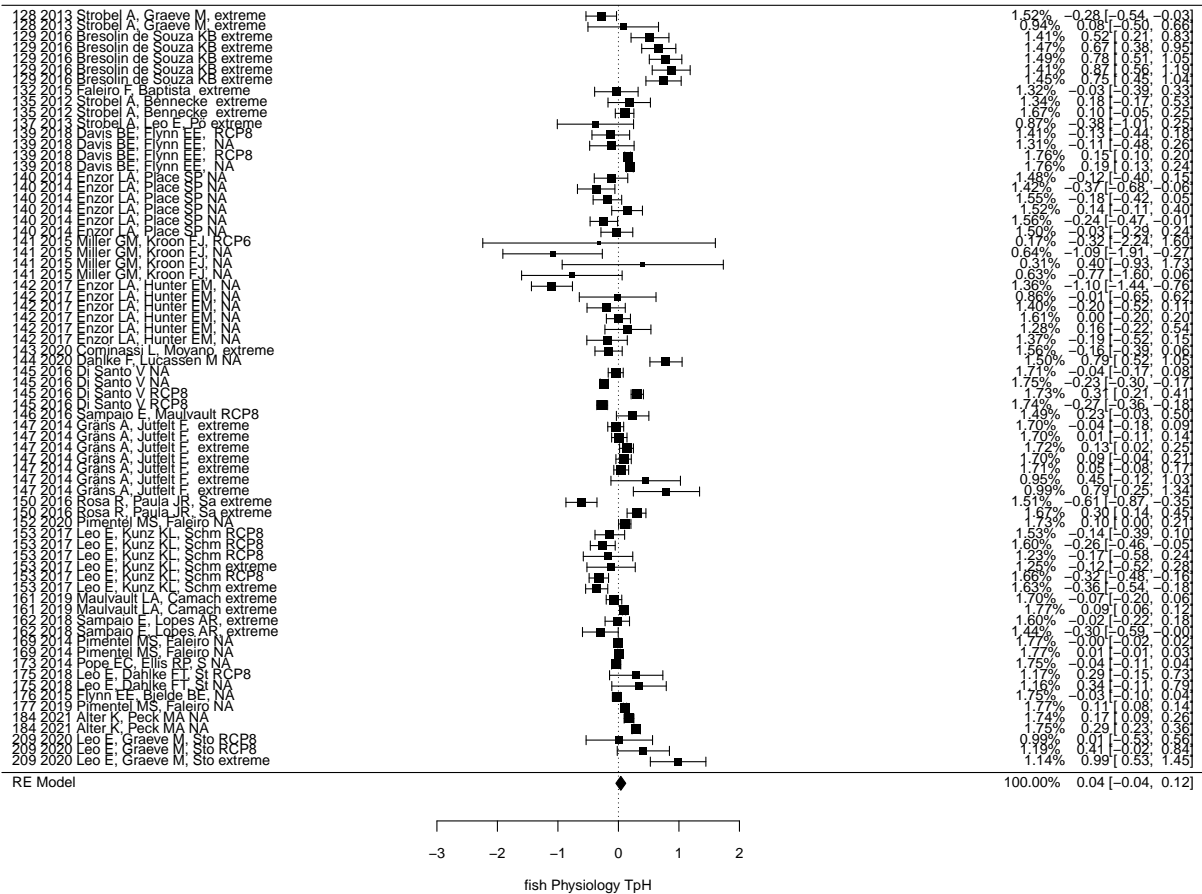

```

Abs_FishPhys <- MA_TpH_abs("fish", "Physiology", Fish)

colnames(sensitivity) <- c("taxa", "stressor", "metric", "Rosenthal nb", "threshold", "original pval", "trim p", "weight")
write.csv(sensitivity, "file_sensitivity.csv")

```
