# Supplementary material for: Hidden impacts of climate change on biological responses of marine life
Source: Research Square preprint supplement (doi:10.21203/rs.3.rs-3085741/v1), 2023-07-27
Supplement: Supplementary file 2 [file 4352d980678f9af6b9e02ecd.xlsx]

## Sheet: Sheet1
positive	negative	ambiguous
Behavior
Predator latency	Time to foraging choice	Absolute lateralization
Maximum escape speed from a predator	Time to locate food	Routine activity
Route finding	Time to right	Attack rate on prey
Critical swimming speed (Ucrit)		Clustering of mussels
		Escape distance from predator
		Feeding rate
		Activity intensity during chasing protocol
		Routine locomotion speed
		Percent change in feeding strikes
		Preference of predator for a prey type
		Response time until locomotion towards food began
		Scototaxis
		Time defending the nest
		Habitat preference
Biodiversity
Evenness
Species richness
Biomechanics
Force required to break skeletal structure
Force required to break byssal thread attachment
Force required to tear a muscle
Vickers microhardness
Calcification
Calcification rate	Shell damage	Calcified mass
		Calcified mass to soft tissue mass ratio
		Calcite content in shell
		Calcite to aragonite ratio
		Calcium content
		Density of hydroxyapatite
		Otolith size
		Statolith volume
Development
Metamorphosis		Number of byssal threads
Normal morphology		Developmental time
Settlement		Eye diameter
		Female to male ratio
		Females
		Hatching time
		Life-stage
		Mean larval emergence
		Molt stage duration
		Spine number
		Yolk area
Growth
Condition factor		Egg size
Growth rate		Hepatosomatic index
Length		Immune-positive cell cover
Scope for growth		Skeletal mass
Size		Skeletal weight
Weight		Test thickness
		Tube volume
		Weight of byssal threads
Physiology
Absorption efficiency	Apoptotic cells	Antioxidant concentration
Adenylate energy charge	Maximum proton leaks capacities	Carbohydrate to nitrogen ratio
Antioxidant capacity	Oxidative stress marker	Enzyme activity
Critical thermal maximum		Excretion
Endurance (performance)		Heart rate
Hematocrit		Heat shock proteins
Mitochondrial capacity		Hemolymph/blood pCO2
Unsaturation index		Hemolymph/blood pH
		Lipid content
		Lipid index
		Maximal cardiac flow
		Mitochondrial electron transport system activity
		Osmolarity
		Plasma 17beta estradiol
		Protein content
		RNA to DNA ratio
		Stomach pH
		Symbiont density
		Total hemocyte counts
		Ventilation Rate
		Water loss
Reproduction
Egg production
Fecundity
Fertilization success
Gonad index
Ovigerous female
Reproductive investment
Reproductive output
Metabolism
Metabolic scope		Oxygen consumption rate
Survival
Developmental success
Number of individuals
Survival
