# Supplementary material for: Hidden impacts of climate change on biological responses of marine life
Source: Research Square preprint supplement (doi:10.21203/rs.3.rs-3085741/v1), 2023-07-27
Supplement: Supplementary file 3 [file 6dc3e1ca0991df0fc56c57e5.xlsx]

## Sheet: Sheet1
Biological response category	Reference	DOI	kept metric 1	kept metric 2
Behavior	Fonseca et al. 2020	https://doi.org/10.1016/j.scitotenv.2020.139187	Routine activity
Behavior	Domenici et al. 2017	https://doi.org/10.1242/jeb.151779	Absolute lateralization	Route finding
Behavior	Horwitz et al. 2020	https://doi.org/10.1038/s41598-020-62304-4	Time to foraging choice	Routine locomotion speed
Behavior	Schram et al. 2014	https://doi.org/10.1016/j.jembe.2014.04.005	Maximum escape speed from a predator	Time to right
Behavior	Stevenson et al. 2020	https://doi.org/10.1038/s41598-020-65220-9	Feeding rate
Behavior	Chatzinikolaou et al. 2019	https://doi.org/10.12681/mms.19187	Response time until locomotion towards food began	Routine locomotion speed
Behavior	Domenici et al. 2014	https://doi.org/10.1371/journal.pone.0087969	Absolute lateralization
Behavior	Faleiro et al. 2015	https://doi.org/10.1093/conphys/cov009	Routine activity	Feeding rate
Behavior	Allan et al. 2017	https://doi.org/10.1098/rspb.2017.0784	Attack rate on prey
Behavior	Nowicki et al. 2012	https://doi.org/10.1016/j.jembe.2011.10.020	Feeding rate	Routine activity
Behavior	Sampaio et al. 2016	https://doi.org/10.1007/s00227-016-2994-8	Absolute lateralization	Habitat preference
Behavior	Pistevos et al. 2017	https://doi.org/10.1111/oik.03182	Time to accept food	Routine activity
Behavior	Maulvault et al. 2018	https://doi.org/10.1016/j.scitotenv.2018.04.015	Routine activity	Absolute lateralization
Behavior	Jarrold and Munday 2018	https://doi.org/10.3389/fmars.2018.00458	Absolute lateralization	Predator latency
Behavior	Schmidt et al. 2017	https://doi.org/10.3354/meps12130	Routine activity	Absolute lateralization
Behavior	Laubenstein et al. 2018	https://doi.org/10.3390/d10020035	Routine activity
Biodiversity	Sarmento et al. 2017	https://doi.org/10.1093/icesjms/fsw192	Species richness
Biomechanics	Collard et al. 2016	https://doi.org/10.1093/icesjms/fsv018	Force required to break skeletal structure
Biomechanics	Movilla et al. 2016	https://doi.org/10.1007/s00227-016-2908-9	Force required to break skeletal structure
Biomechanics	Alma et al. 2020	https://doi.org/10.1016/j.cbpa.2019.110579	Force required to break skeletal structure
Biomechanics	Li et al. 2016	https://doi.org/10.1080/08927014.2015.1129532	Force required to break skeletal structure
Biomechanics	Lemasson and Knights 2021	https://doi.org/10.3354/meps13687	Force required to tear a muscle	Force required to break skeletal structure
Calcification	Lee et al. 2021	https://doi.org/10.1016/j.jembe.2021.151562	Calcite content
Calcification	Enrique-Navarro et al. 2021	https://doi.org/10.1371/journal.pone.0254983	Statolith volume
Development	Cole et al. 2016	https://doi.org/10.1007/s00227-016-2880-4	Normal morphology
Development	Sarmento et al. 2017	https://doi.org/10.1093/icesjms/fsw192	Normal morphology
Development	Sheppard Brennand et al. 2010	https://doi.org/10.1371/journal.pone.0011372	Normal morphology
Development	Pecorino et al. 2014	https://doi.org/10.1007/s00227-013-2318-1	Life-stage	Normal morphology
Development	Byrne et al. 2011	https://doi.org/10.1098/rspb.2010.2404	Normal morphology
Development	Mos et al. 2019	https://doi.org/10.1016/j.scitotenv.2018.07.379	Normal morphology	Settlement
Development	Byrne et al. 2013	https://doi.org/10.1111/gcb.12190	Normal morphology
Development	Rosa et al. 2014a	https://doi.org/10.1242/jeb.096081	Normal morphology	Developmental time
Development	Chua et al. 2013	https://doi.org/10.3354/meps10077	Metamorphosis	Time to motile stage
Development	Pansch et al. 2012	https://doi.org/10.1016/j.jembe.2012.03.023	Developmental time
Development	Rosa et al. 2014b	https://doi.org/10.1098/rspb.2014.1738	Developmental time
Development	Alter and Peck 2021	https://doi.org/10.1016/j.scitotenv.2021.146926	Hatching time	Normal morphology
Development	Arnberg et al. 2013	https://doi.org/10.1007/s00227-012-2072-9	Life-stage	Developmental time
Development	Baragi and Anil 2015	https://doi.org/10.1016/j.jembe.2015.05.010	Developmental time	Metamorphosis
Development	Bylenga et al. 2017	https://doi.org/10.1371/journal.pone.0175706	Life-stage	Normal morphology
Growth	Wolfe et al. 2013a	https://doi.org/10.1111/gcb.12249	Size
Growth	Anlauf et al. 2011	https://doi.org/10.1016/j.jembe.2010.11.009	Weight
Growth	Sheppard Brennand et al. 2010	https://doi.org/10.1371/journal.pone.0011372	Growth rate
Growth	Mackenzie et al. 2014	https://doi.org/10.1371/journal.pone.0086764	Condition factor
Growth	Wolfe et al. 2013b		Size
Growth	Rivest et al. 2017	https://doi.org/10.1098/rspb.2016.2825	Length
Growth	Schalkhausser et al. 2014	https://doi.org/10.1007/s00227-014-2548-x	Condition factor
Growth	Mos et al. 2019	https://doi.org/10.1016/j.scitotenv.2018.07.379	Size
Growth	Strobel et al. 2012	https://doi.org/10.1186/1742-9994-9-28	Condition factor
Growth	Miller et al. 2015	https://doi.org/10.1890/14-0559.1	Condition factor
Growth	Enzor et al. 2017	https://doi.org/10.1093/conphys/cox019	Growth rate	Condition factor
Growth	Maulvault et al. 2019	https://doi.org/10.1016/j.envres.2018.10.021	Hepatosomatic index	Condition factor
Growth	Alter and Peck 2021	https://doi.org/10.1016/j.scitotenv.2021.146926	Length
Physiology	Putnam et al. 2013	https://doi.org/10.1007/s00227-012-2129-9	Heat shock proteins	RNA to DNA ratio
Physiology	Gazeau et al. 2014	https://doi.org/10.3389/fmars.2014.00062	Excretion	Hemolymph/blood pCO2
Physiology	Calosi et al. 2013	https://doi.org/10.1093/icb/ict041	Enzyme activity (Naþ/Kþ-ATPase)	Critical thermal maximum
Physiology	Matoo et al. 2013	https://doi.org/10.1016/j.cbpa.2012.12.025	Antioxidant capacity	Oxidative stress marker
Physiology	Movilla et al. 2016	https://doi.org/10.1007/s00227-016-2908-9	Protein content
Physiology	Navarro et al. 2016	https://doi.org/10.1093/icesjms/fsv249	Absorption efficiency	Excretion
Physiology	Parker et al. 2018	https://doi.org/10.1098/rspb.2017.2869	Hemolymph/blood pH	Lipid content
Physiology	Rivest et al. 2017	https://doi.org/10.1098/rspb.2016.2825	Symbiont density	Protein content
Physiology	Ivanina et al. 2013	https://doi.org/10.1016/j.cbpa.2013.05.016	Adenylate energy charge	Enzyme activity (carbonic anhydrase)
Physiology	Khan et al. 2020	https://doi.org/10.1016/j.chemosphere.2020.127096	Enzyme activity (trypsin)
Physiology	Hernroth et al. 2012	https://doi.org/10.1016/j.fsi.2012.08.011	Apoptotic cells	Total hemocyte counts
Physiology	Rivest et al. 2018	https://doi.org/10.3389/fmars.2018.00186	Symbiont density	Protein content
Physiology	Rosa et al. 2014	https://doi.org/10.1242/jeb.096081	Heat shock protein level	Critical thermal maximum
Physiology	Strobel et al. 2013a	https://doi.org/10.1371/journal.pone.0068865	Maximum proton leaks capacities	Unsaturation index
Physiology	Strobel et al. 2012	https://doi.org/10.1186/1742-9994-9-28	Hematocrit	Hemolymph/blood pCO2
Physiology	Stobel et al. 2013b	https://doi.org/10.1016/j.cbpb.2013.06.006	Enzyme activity (cytochrome C oxidase)
Physiology	Davis et al. 2018	https://doi.org/10.1111/gcb.13987	Enzyme activity (cytochrome C oxidase)	Heart rate
Physiology	Enzor and Place 2014	https://doi.org/10.1242/jeb.108431	Antioxidant capacity	Oxidative stress marker
Physiology	Enzor et al. 2017	https://doi.org/10.1093/conphys/cox019	Enzyme activity (citrate synthase)	Lipid content
Physiology	Gräns et al. 2014	https://doi.org/10.1242/jeb.096743	Hematocrit	Maximal cardiac flow
Physiology	Rosa et al. 2016	https://doi.org/10.1007/s00227-016-2898-7	Antioxidant capacity	Oxidative stress marker
Physiology	Pimentel et al. 2019	https://doi.org/10.3390/fishes5010001	Heart rates	Citrate synthase activity
Physiology	Leo et al. 2017	https://doi.org/10.1186/s12983-017-0205-1	Mitochondrial capacity
Physiology	Maulvault et al. 2019a	https://doi.org/10.1016/j.envpol.2018.11.020	Antioxidant capacity	Heat shock proteins
Physiology	Sampaio et al. 2018	https://doi.org/10.1016/j.scitotenv.2017.11.059	Antioxidant capacity	Heat shock proteins
Physiology	Zhang et al. 2021	https://doi.org/10.1016/j.scitotenv.2021.146876	Oxidative stress marker	Antioxidant capacity
Physiology	Jiang et al. 2021	https://doi.org/10.1007/s00338-021-02161-3	Oxidative stress marker
Physiology	Khan et al. 2021	https://doi.org/10.1016/j.marpolbul.2020.111869	Oxidative stress marker	Antioxidant capacity
Physiology	Kavousi et al. 2015	https://doi.org/10.1016/j.marenvres.2015.05.004	Protein content	Symbiont density
Physiology	Maulvault et al. 2019b	https://doi.org/10.1016/j.envres.2018.10.021	Antioxidant capacity	Oxidative stress marker
Reproduction	Parker et al. 2018	https://doi.org/10.1098/rspb.2017.2869	Fecundity
Reproduction	Miller et al. 2015	https://doi.org/10.1890/14-0559.1	Reproductive output
Survival	Alter and Peck 2021	https://doi.org/10.1016/j.scitotenv.2021.146926	Developmental success
