# Supplementary material for: Hidden impacts of climate change on biological responses of marine life
Source: Research Square preprint supplement (doi:10.21203/rs.3.rs-3085741/v1), 2023-07-27
Supplement: Supplementary file 4 [file 6e2a4d22cb235473cbf90412.xlsx]

## Sheet: Sheet1
			Model heterogeneity			Residual heterogeneity
Biological response	Driver	N	Qm	df	p	Qe	df	p
Fish
Behavior	T	38	1.15	2	0.56	153	35	0
	pCO2	33	5.11	2	0.08	167	30	0
	TpH	43	0.5	2	0.78	125	29	0
Development	T	19	0.17	2	0.92	1836	16	0
	pCO2	15	0.91	2	0.64	1539	12	0
	T pCO2	21	5.15	1	0.02	174	6	0
Growth	T	60	2.85	2	0.24	1705	57	0
	T pCO2	70	0.04	2	0.98	1194	40	0
	pCO2	46	3.43	2	0.18	937	43	0
Metabolism	T	47	3.78	2	0.15	503	44	0
	pCO2	34	0.15	1	0.7	270	31	0
	T pCO2	50	2.26	1	0.13	186	24	0
Physiology	T	66	0.18	2	0.91	592	63	0
	T pCO2	70	0.44	2	0.8	160	38	0
	pH	53	0.76	2	0.69	343	50	0
Reproduction	T	7	0.68	1	0.41	48	4	0
	pCO2	6	1.28	2	0.53	9	3	0.026
	T pCO2	10	NA	NA	NA	NA	NA	NA
Survival	T	30	9.94	2	0.01	542	27	0
	pCO2	24	1.04	2	0.59	875	21	0
	T pCO2	34	4.28	1	0.04	2628	18	0
Invertebrates
Behavior	pCO2	40	0.45	2	0.8	155	37	0
	T	40	4.98	2	0.08	222	37	0
	T pCO2	49	0.49	1	0.48	157	18	0
Biomechanics	pCO2	23	3.83	2	0.15	61	20	0
	T	18	2	2	0.37	107	15	0
	T pCO2	24	5.39	1	0.02	37	9	0
Biodiversity	pCO2	9	1.91	1	0.17	7	6	0.431
	T pCO2	9	NA	NA	NA	NA	NA	NA
	T	3	NA	NA	NA	NA	NA	NA
Calcification	pCO2	51	0.82	2	0.66	17204	48	0
	T	43	0.53	2	0.77	180	40	0
	T pCO2	56	8.24	2	0.02	436	25	0
Development	pCO2	108	4.98	2	0.08	1282	105	0
	T	72	4.5	2	0.11	2564	69	0
	T pCO2	129	2.73	2	0.26	2506	59	0
Growth	pCO2	124	1.86	2	0.39	2284	121	0
	T	92	3.63	2	0.16	1128	89	0
	T pCO2	148	2.7	2	0.26	2396	68	0
Metabolism	pCO2	41	6.83	2	0.03	52	38	0.07
	T	41	5.09	1	0.02	201	38	0
	T pCO2	51	9.01	1	0	294	29	0
Physiology	pCO2	82	5	2	0.08	1533	79	0
	T	77	0.96	2	0.62	2070	74	0
	T pCO2	94	0.15	1	0.7	401	43	0
Reproduction	pCO2	55	4.17	2	0.12	341	52	0
	T	52	3.52	2	0.17	389	49	0
	T pCO2	92	1.49	2	0.47	85	37	0
Survival	T pCO2	120	4.48	2	0.11	303	41	0
	pCO2	110	8.76	2	0.01	5156	107	0
	T	64	5.31	2	0.07	528	61	0
