# Supplementary material for: Hidden impacts of climate change on biological responses of marine life
Source: Research Square preprint supplement (doi:10.21203/rs.3.rs-3085741/v1), 2023-07-27
Supplement: Supplementary file 5 [file 9d3d7b0f0463a17a06e3b7b3.xlsx]

## Sheet: Sheet1
Biological response	Driver	n	p-value	Lower CI	Upper CI	ei	Qt	df	pQt
Fish
Behavior	T	38	0	0.195	0.371	0.283	153.561	37	0
	pCO2	33	0	0.197	0.444	0.32	172.531	32	0
	T pCO2	43	0	0.21	0.361	0.285	139.481	42	0
Calcification	T	4	0.185	-0.175	0.905	0.365	4058.26	3	0
	pCO2	3	0.079	-0.042	0.754	0.356	236.216	2	0
	T pCO2	4	0.066	-0.037	1.179	0.571	5576.73	3	0
Development	T	19	0	0.131	0.399	0.265	2514.87	18	0
	pCO2	15	0.009	0.037	0.266	0.152	4180.06	14	0
	T pCO2	21	0	0.204	0.53	0.367	11505.4	20	0
Growth	T	60	0	0.144	0.271	0.207	1944.39	59	0
	pCO2	46	0	0.05	0.123	0.087	965.428	45	0
	T pCO2	70	0	0.164	0.274	0.219	1623.73	69	0
Metabolism	T	47	0	0.32	0.501	0.411	896.096	46	0
	pCO2	34	0	0.174	0.316	0.245	272.869	33	0
	T pCO2	50	0	0.359	0.575	0.467	773.316	49	0
Physiology	T	66	0	0.147	0.249	0.198	594.395	65	0
	pCO2	53	0	0.073	0.151	0.112	356.389	52	0
	T pCO2	70	0	0.183	0.293	0.238	498.943	69	0
Reproduction	T	7	0.015	0.076	0.711	0.394	68.539	6	0
	pCO2	6	0.06	-0.005	0.273	0.134	29.372	5	0
	T pCO2	10	0.001	0.142	0.546	0.344	64.343	9	0
Survival	T	30	0	0.221	0.538	0.379	1224.69	29	0
	pCO2	24	0.001	0.053	0.19	0.122	877.465	23	0
	T pCO2	34	0	0.338	0.713	0.526	3243.61	33	0
Invertebrates
Behavior	T	40	0	0.305	0.54	0.423	582.986	39	0
	pCO2	40	0	0.282	0.536	0.409	238.846	39	0
	T pCO2	49	0	0.299	0.503	0.401	736.871	48	0
Biomechanics	T	18	0	0.122	0.293	0.208	112.446	17	0
	pCO2	23	0	0.107	0.243	0.175	128.745	22	0
	T pCO2	24	0	0.14	0.295	0.217	245.12	23	0
Biodiversity	T	3	0.005	0.056	0.325	0.19	0.726	2	0.696
	pCO2	9	0	0.082	0.275	0.178	8.896	8	0.351
	T pCO2	9	0.006	0.066	0.403	0.234	38.638	8	0
Calcification	T	43	0	0.139	0.276	0.208	244.027	42	0
	pCO2	51	0	0.209	0.466	0.337	31992.4	50	0
	T pCO2	56	0	0.238	0.448	0.343	814.066	55	0
Development	T	72	0	0.288	0.534	0.411	2582.74	71	0
	pCO2	108	0	0.129	0.215	0.172	1439.25	107	0
	T pCO2	129	0	0.428	0.641	0.534	7481.09	128	0
Growth	T	92	0	0.147	0.256	0.202	1130.75	91	0
	pCO2	124	0	0.126	0.201	0.163	2426.72	123	0
	T pCO2	148	0	0.192	0.296	0.244	4395.79	147	0
Metabolism	T	41	0	0.382	0.591	0.486	237.292	40	0
	pCO2	41	0	0.115	0.214	0.165	58.428	40	0.03
	T pCO2	51	0	0.402	0.643	0.523	566.326	50	0
Physiology	T	77	0	0.225	0.429	0.327	2078.14	76	0
	pCO2	82	0	0.195	0.35	0.272	1544.53	81	0
	T pCO2	94	0	0.262	0.431	0.347	2102.85	93	0
Reproduction	T	52	0	0.088	0.233	0.16	394.724	51	0
	pCO2	55	0	0.089	0.314	0.201	346.366	54	0
	T pCO2	92	0	0.134	0.306	0.22	742.439	91	0
Survival	T	64	0	0.18	0.381	0.281	548.313	63	0
	pCO2	110	0	0.204	0.33	0.267	5583.23	109	0
	T pCO2	120	0	0.35	0.521	0.435	2364.03	119	0
