# Supplementary material for: Hidden impacts of climate change on biological responses of marine life
Source: Research Square preprint supplement (doi:10.21203/rs.3.rs-3085741/v1), 2023-07-27
Supplement: Supplementary file 6 [file dee851d56729dbe0f34d12a2.xlsx]

## Sheet: MA_relative
taxa	biological response	driver	scenario	n	p-value	lower CI	upper CI	ei	Qt	df	pQt
fish	Behavior	T	RCP6	3	0.127527	-0.0462087	0.369204	0.161497	0.642443	2	0.725263
fish	Behavior	T	RCP8	23	0.0693124	-0.0133416	0.350886	0.168772	220.495	22	1.0592e-34
fish	Behavior	T	extreme	12	0.0607135	-0.328395	0.00722522	-0.160585	68.9375	11	1.94404e-10
fish	Behavior	TpCO2	RCP6	3	0.0324063	0.0149073	0.340638	0.177773	3.84856	2	0.145981
fish	Behavior	TpCO2	RCP8	21	0.132747	-0.0404743	0.306993	0.133259	207.008	20	4.59932e-33
fish	Behavior	TpCO2	extreme	8	0.171211	-0.734659	0.130594	-0.302033	75.3742	7	1.20391e-13
fish	Behavior	pCO2	RCP6	3	0.559968	-1.19556	0.647452	-0.274054	8.37456	2	0.0151875
fish	Behavior	pCO2	RCP8	23	0.812983	-0.129955	0.165634	0.0178397	139.834	22	3.86768e-19
fish	Behavior	pCO2	extreme	7	0.228379	-1.08001	0.257815	-0.411096	115.489	6	1.44204e-22
fish	Behavior	T	all	38	0.349398	-0.0691537	0.195517	0.0631817	331.827	37	4.62322e-49
fish	Behavior	pCO2	all	33	0.456478	-0.236533	0.106285	-0.0651242	263.911	32	2.71868e-38
fish	Behavior	TpCO2	all	43	0.77559	-0.10595	0.142016	0.0180329	348.538	42	6.40864e-50
fish	Calcification	T	RCP8	2	0.286039	-0.496838	1.68382	0.59349	3094.7	1	0
fish	Calcification	pCO2	extreme	2	0.243838	-0.13467	0.529755	0.197542	229.842	1	6.45357e-52
fish	Calcification	T	all	4	0.196214	-0.185553	0.904036	0.359241	4107.23	3	0
fish	Calcification	pCO2	all	3	0.0793298	-0.0417126	0.754439	0.356363	236.216	2	5.08491e-52
fish	Calcification	TpCO2	all	4	0.0658186	-0.0373244	1.1788	0.57074	5576.73	3	0
fish	Development	T	RCP6	4	0.415385	-0.770293	0.318041	-0.226126	871.441	3	1.3856e-188
fish	Development	T	RCP8	9	0.00496114	-0.404962	-0.0721351	-0.238549	886.881	8	3.81455e-186
fish	Development	T	extreme	6	0.0403032	-0.452296	-0.0102247	-0.23126	157.669	5	3.10595e-32
fish	Development	TpCO2	RCP8	6	0.00165612	-0.304944	-0.0708262	-0.187885	142.98	5	4.15975e-29
fish	Development	TpCO2	extreme	3	0.0116741	-0.972417	-0.121911	-0.547164	30.9705	2	1.88297e-07
fish	Development	pCO2	RCP8	8	0.974408	-0.142939	0.138335	-0.00230191	268.776	7	2.77631e-54
fish	Development	pCO2	extreme	6	0.222482	-0.44046	0.102501	-0.168979	1372.53	5	1.23539e-294
fish	Development	T	all	19	0.00143451	-0.381862	-0.0910707	-0.236466	2632.52	18	0
fish	Development	pCO2	all	15	0.293833	-0.204788	0.0619329	-0.0714274	4690.18	14	0
fish	Development	TpCO2	all	21	0.000362763	-0.506133	-0.147086	-0.32661	12571.4	20	0
fish	Growth	T	RCP6	8	0.0154489	-0.0410003	-0.00432043	-0.0226604	19.4801	7	0.0068093
fish	Growth	T	RCP8	23	0.147999	-0.0331835	0.220215	0.0935157	1721.55	22	0
fish	Growth	T	extreme	29	0.25477	-0.0568982	0.214726	0.0789138	1258.41	28	2.17649e-247
fish	Growth	TpCO2	RCP6	3	0.33201	-1.27025	0.429143	-0.420552	24.5078	2	4.76638e-06
fish	Growth	TpCO2	RCP8	15	0.372906	-0.0964601	0.257277	0.0804085	1262.15	14	7.51326e-261
fish	Growth	TpCO2	extreme	25	0.0138799	0.0333575	0.29467	0.164014	1473.58	24	9.16005e-297
fish	Growth	pCO2	RCP6	4	0.10074	-0.00303104	0.0342514	0.0156102	10.8688	3	0.0124566
fish	Growth	pCO2	RCP8	26	0.0494747	-0.148833	-0.000171204	-0.0745023	430.66	25	1.59093e-75
fish	Growth	pCO2	extreme	16	0.311759	-0.0663249	0.0211692	-0.0225779	629.415	15	1.98413e-124
fish	Growth	T	all	60	0.070174	-0.00616778	0.155902	0.074867	3230.41	59	0
fish	Growth	pCO2	all	46	0.034341	-0.0886946	-0.00339633	-0.0460455	1113.94	45	6.11696e-204
fish	Growth	TpCO2	all	70	0.296541	-0.0360071	0.118067	0.0410301	3426.59	69	0
fish	Metabolism	T	RCP6	2	0.601811	-0.138768	0.239464	0.0503479	1.20131	1	0.273059
fish	Metabolism	T	RCP8	21	0.0408662	0.00937769	0.442247	0.225813	327.694	20	1.72479e-57
fish	Metabolism	T	extreme	24	2.65528e-10	0.304472	0.578356	0.441414	389.438	23	2.6414e-68
fish	Metabolism	TpCO2	RCP8	16	0.617412	-0.286499	0.482484	0.0979926	400.058	15	6.72616e-76
fish	Metabolism	TpCO2	extreme	11	8.16685e-11	0.21978	0.409646	0.314713	43.2013	10	4.57731e-06
fish	Metabolism	pCO2	RCP8	23	0.176358	-0.0452198	0.246367	0.100574	143.254	22	8.8724e-20
fish	Metabolism	pCO2	extreme	11	4.59427e-10	-0.277337	-0.144635	-0.210986	187.76	10	5.71896e-35
fish	Metabolism	T	all	47	7.30479e-08	0.209736	0.449882	0.329809	1088.22	46	7.05949e-198
fish	Metabolism	pCO2	all	34	0.863215	-0.125368	0.105109	-0.0101296	606.558	33	1.15796e-106
fish	Metabolism	TpCO2	all	50	0.000204462	0.137779	0.445786	0.291783	983.115	49	4.92162e-174
fish	Physiology	T	RCP6	3	0.551514	-0.203274	0.380703	0.0887144	30.4571	2	2.43402e-07
fish	Physiology	T	RCP8	20	0.0770429	-0.00996145	0.193567	0.0918027	507.797	19	1.29098e-95
fish	Physiology	T	extreme	43	0.178907	-0.0305446	0.163878	0.0666669	266.431	42	2.09052e-34
fish	Physiology	TpCO2	RCP8	12	0.934351	-0.159805	0.146914	-0.00644524	130.986	11	1.09941e-22
fish	Physiology	TpCO2	extreme	28	0.054164	-0.00261266	0.294746	0.146067	210.869	27	2.08333e-30
fish	Physiology	pCO2	RCP6	2	0.881185	-0.0630809	0.0541415	-0.00446969	0.946624	1	0.33058
fish	Physiology	pCO2	RCP8	30	0.238101	-0.106131	0.0263734	-0.0398786	63.0415	29	0.000254663
fish	Physiology	pCO2	extreme	21	0.69086	-0.0898063	0.0595093	-0.0151485	320.648	20	4.81286e-56
fish	Physiology	T	all	66	0.0383058	0.00400279	0.144595	0.0742988	832.047	65	1.56224e-133
fish	Physiology	pCO2	all	53	0.248935	-0.0745389	0.0193243	-0.0276073	406.598	52	1.89552e-56
fish	Physiology	TpCO2	all	70	0.343474	-0.0423785	0.121668	0.039645	685.044	69	3.14975e-102
fish	Reproduction	T	RCP6	3	0.266504	-0.672029	0.185739	-0.243145	30.7682	2	2.08339e-07
fish	Reproduction	T	RCP8	4	0.0605929	-1.22493	0.026664	-0.599135	16.7527	3	0.00079453
fish	Reproduction	TpCO2	RCP6	2	0.140992	-1.01554	0.144355	-0.435591	1.28755	1	0.2565
fish	Reproduction	pCO2	RCP6	2	0.429018	-0.878963	2.06818	0.594607	11.9484	1	0.000546935
fish	Reproduction	pCO2	RCP8	2	0.450968	-0.668074	0.296932	-0.185571	1.27167	1	0.259454
fish	Reproduction	pCO2	extreme	2	0.586473	-0.0248428	0.014049	-0.00539687	0.100806	1	0.750864
fish	Reproduction	T	all	7	0.0150577	-0.711122	-0.0762832	-0.393703	68.5394	6	8.1465e-13
fish	Reproduction	pCO2	all	6	0.799918	-0.250029	0.324298	0.0371346	29.8652	5	1.56776e-05
fish	Reproduction	TpCO2	all	10	0.0510596	-0.479227	0.00110099	-0.239063	66.186	9	8.47742e-11
fish	Survival	T	RCP6	3	0.810183	-1.89252	1.47931	-0.206606	84.9958	2	3.49452e-19
fish	Survival	T	RCP8	13	0.00010982	-0.137793	-0.0451093	-0.0914512	56.1603	12	1.12004e-07
fish	Survival	T	extreme	14	0.000218957	-0.687859	-0.211137	-0.449498	441.027	13	4.70752e-86
fish	Survival	TpCO2	RCP8	9	0.406487	-0.136846	0.0554177	-0.0407141	18.944	8	0.0151622
fish	Survival	TpCO2	extreme	12	0.000420948	-1.04602	-0.298681	-0.672353	2656.98	11	0
fish	Survival	pCO2	RCP8	11	0.979949	-0.178167	0.173656	-0.00225569	42.2426	10	6.78893e-06
fish	Survival	pCO2	extreme	12	0.0400828	-0.182157	-0.00421843	-0.0931876	849.852	11	3.71663e-175
fish	Survival	T	all	30	0.00519746	-0.455603	-0.0799731	-0.267788	1320.93	29	7.52643e-260
fish	Survival	pCO2	all	24	0.0886028	-0.145931	0.0102453	-0.067843	897.887	23	6.44209e-175
fish	Survival	TpCO2	all	34	0.000200962	-0.629146	-0.194784	-0.411965	3324.98	33	0
invertebrates	Behavior	T	RCP8	24	0.671664	-0.185881	0.288464	0.0512913	802.686	23	9.37012e-155
invertebrates	Behavior	T	extreme	15	0.886667	-0.292625	0.252952	-0.0198364	134.747	14	7.82494e-22
invertebrates	Behavior	TpCO2	RCP8	15	0.715134	-0.388749	0.266697	-0.0610261	439.697	14	5.34921e-85
invertebrates	Behavior	TpCO2	extreme	6	0.44886	-1.03974	0.460179	-0.289778	56.9824	5	5.09936e-11
invertebrates	Behavior	pCO2	RCP6	5	0.198256	-0.506491	0.105062	-0.200714	9.11656	4	0.0582512
invertebrates	Behavior	pCO2	RCP8	19	0.194272	-0.498712	0.101322	-0.198695	202.524	18	3.13209e-33
invertebrates	Behavior	pCO2	extreme	16	0.0846215	-0.485226	0.0310125	-0.227107	119.028	15	2.92168e-18
invertebrates	Behavior	T	all	40	0.963336	-0.187408	0.178818	-0.00429464	974.441	39	5.00766e-179
invertebrates	Behavior	pCO2	all	40	0.0142339	-0.398439	-0.0443794	-0.221409	369.551	39	1.94385e-55
invertebrates	Behavior	TpCO2	all	49	0.770423	-0.133442	0.180131	0.0233442	1220.51	48	4.36553e-224
invertebrates	Biomechanics	T	RCP8	10	0.957765	-0.191442	0.181369	-0.00503671	50.4739	9	8.7727e-08
invertebrates	Biomechanics	T	extreme	7	0.935944	-0.218196	0.201006	-0.00859473	91.93	6	1.20331e-17
invertebrates	Biomechanics	TpCO2	RCP8	8	0.746913	-0.135533	0.188962	0.0267145	31.3527	7	5.35171e-05
invertebrates	Biomechanics	TpCO2	extreme	4	0.55007	-0.601445	0.320358	-0.140544	38.9791	3	1.75342e-08
invertebrates	Biomechanics	pCO2	RCP6	9	0.414364	-0.0492142	0.020275	-0.0144696	13.2293	8	0.104198
invertebrates	Biomechanics	pCO2	RCP8	11	0.0859419	-0.265803	0.0175478	-0.124128	56.0307	10	2.02588e-08
invertebrates	Biomechanics	pCO2	extreme	3	0.000281825	-0.4261	-0.127378	-0.276739	10.2468	2	0.00595563
invertebrates	Biomechanics	T	all	18	0.679965	-0.166342	0.108497	-0.0289224	160.038	17	2.61209e-25
invertebrates	Biomechanics	pCO2	all	23	0.00893124	-0.201181	-0.0287926	-0.114987	144.604	22	4.95303e-20
invertebrates	Biomechanics	TpCO2	all	24	0.311956	-0.171076	0.0546342	-0.0582208	302.242	23	1.61183e-50
invertebrates	Biodiversity	T	extreme	3	0.425234	-0.145171	0.344306	0.0995672	6.6051	2	0.0367892
invertebrates	Biodiversity	TpCO2	extreme	3	0.710488	-0.28683	0.195484	-0.0456731	6.53291	2	0.0381413
invertebrates	Biodiversity	pCO2	RCP8	3	0.883599	-0.158909	0.184567	0.0128287	2.73271	2	0.255035
invertebrates	Biodiversity	pCO2	extreme	6	0.269395	-0.401219	0.11201	-0.144605	18.1849	5	0.00272336
invertebrates	Biodiversity	T	all	3	0.425234	-0.145171	0.344306	0.0995672	6.6051	2	0.0367892
invertebrates	Biodiversity	pCO2	all	9	0.387448	-0.239534	0.0929319	-0.0733012	21.6547	8	0.00559739
invertebrates	Biodiversity	TpCO2	all	9	0.267123	-0.337359	0.0934431	-0.121958	66.7796	8	2.1441e-11
invertebrates	Calcification	T	RCP6	3	0.493306	-0.208363	0.432287	0.111962	9.98527	2	0.00678776
invertebrates	Calcification	T	RCP8	27	0.309366	-0.0638026	0.201301	0.0687491	120.083	26	4.78648e-14
invertebrates	Calcification	T	extreme	13	0.261759	-0.0673163	0.247676	0.0901796	157.685	12	1.5557e-27
invertebrates	Calcification	TpCO2	RCP8	23	0.0146609	-0.331189	-0.0361762	-0.183683	137.358	22	1.11859e-18
invertebrates	Calcification	TpCO2	extreme	4	0.0291932	-1.72657	-0.0921083	-0.909338	342.564	3	6.07846e-74
invertebrates	Calcification	pCO2	RCP6	11	0.25722	-0.365218	0.0976501	-0.133784	128.199	10	1.08801e-22
invertebrates	Calcification	pCO2	RCP8	33	0.0292649	-0.391108	-0.0207782	-0.205943	19419.9	32	0
invertebrates	Calcification	pCO2	extreme	7	0.0887295	-0.861289	0.060638	-0.400325	329.013	6	4.92349e-68
invertebrates	Calcification	T	all	43	0.109781	-0.0177627	0.175228	0.0787326	330.167	42	2.13195e-46
invertebrates	Calcification	pCO2	all	51	0.00266786	-0.362387	-0.0761966	-0.219292	34498.9	50	0
invertebrates	Calcification	TpCO2	all	56	0.00452395	-0.309128	-0.0566295	-0.182879	1194.62	55	7.25908e-214
invertebrates	Development	T	RCP6	12	0.303975	-0.159089	0.510015	0.175463	517.966	11	4.71552e-104
invertebrates	Development	T	RCP8	23	0.952671	-0.18196	0.171264	-0.00534827	174.679	22	9.40456e-26
invertebrates	Development	T	extreme	37	0.00219956	-0.602065	-0.132107	-0.367086	2193.93	36	0
invertebrates	Development	TpCO2	RCP6	4	0.816075	-1.11645	1.41712	0.150335	179.014	3	1.44002e-38
invertebrates	Development	TpCO2	RCP8	17	0.762685	-0.230031	0.313817	0.0418932	394.068	16	6.37176e-74
invertebrates	Development	TpCO2	extreme	41	0.000128756	-0.763271	-0.246415	-0.504843	2140.91	40	0
invertebrates	Development	pCO2	RCP6	8	0.274225	-0.404113	0.114693	-0.14471	112.058	7	3.43345e-21
invertebrates	Development	pCO2	RCP8	43	0.200439	-0.0644244	0.0135134	-0.0254555	140.368	42	1.58671e-12
invertebrates	Development	pCO2	extreme	57	0.00218219	-0.216937	-0.0476811	-0.132309	1637.95	56	9.11978e-306
invertebrates	Development	T	all	72	0.055014	-0.30057	0.00319254	-0.148689	2933.63	71	0
invertebrates	Development	pCO2	all	108	0.000368882	-0.146719	-0.042555	-0.0946372	1972.81	107	0
invertebrates	Development	TpCO2	all	129	4.69174e-05	-0.418888	-0.146601	-0.282745	9737.92	128	0
invertebrates	Growth	T	RCP6	7	0.484306	-0.0690665	0.145706	0.0383197	60.1892	6	4.11984e-11
invertebrates	Growth	T	RCP8	43	0.955564	-0.0701527	0.0662741	-0.00193929	354.908	42	3.80092e-51
invertebrates	Growth	T	extreme	42	0.694672	-0.175791	0.117128	-0.0293314	1084.11	41	1.53324e-200
invertebrates	Growth	TpCO2	RCP8	35	0.469079	-0.146931	0.0676634	-0.0396338	1022.08	34	1.22202e-192
invertebrates	Growth	TpCO2	extreme	35	0.0692513	-0.341412	0.0129439	-0.164234	1679.18	34	0
invertebrates	Growth	pCO2	RCP6	17	0.656508	-0.0726859	0.115355	0.0213343	52.7075	16	8.41629e-06
invertebrates	Growth	pCO2	RCP8	64	0.00916952	-0.0981806	-0.0138854	-0.056033	638.323	63	4.34651e-96
invertebrates	Growth	pCO2	extreme	43	0.00354145	-0.243591	-0.0477755	-0.145683	1770.27	42	0
invertebrates	Growth	T	all	92	0.670142	-0.0858871	0.0552206	-0.0153332	1579.83	91	4.58859e-270
invertebrates	Growth	pCO2	all	124	0.000113512	-0.132694	-0.0433162	-0.088005	2658.05	123	0
invertebrates	Growth	TpCO2	all	148	0.00246446	-0.16066	-0.0343927	-0.0975265	5006.46	147	0
invertebrates	Metabolism	T	RCP8	22	0.0420615	0.00713354	0.390467	0.1988	158.645	21	3.93735e-23
invertebrates	Metabolism	T	extreme	19	1.90149e-14	0.442912	0.747658	0.595285	147.043	18	2.78615e-22
invertebrates	Metabolism	TpCO2	RCP8	18	0.013235	0.0407086	0.349114	0.194911	53.6324	17	1.13367e-05
invertebrates	Metabolism	TpCO2	extreme	14	6.0455e-07	0.390391	0.895475	0.642933	341.122	13	5.70951e-65
invertebrates	Metabolism	pCO2	RCP6	10	0.733536	-0.209474	0.147476	-0.0309992	22.3328	9	0.00788208
invertebrates	Metabolism	pCO2	RCP8	21	0.604277	-0.174952	0.101778	-0.036587	57.9099	20	1.49229e-05
invertebrates	Metabolism	pCO2	extreme	10	0.535891	-0.0648885	0.1248	0.0299557	18.6564	9	0.0282785
invertebrates	Metabolism	T	all	41	1.07256e-08	0.261028	0.53324	0.397134	412.054	40	2.78571e-63
invertebrates	Metabolism	pCO2	all	41	0.687872	-0.0985279	0.0650072	-0.0167604	103.297	40	1.67705e-07
invertebrates	Metabolism	TpCO2	all	51	6.12676e-09	0.282067	0.569011	0.425539	739.638	50	1.81009e-123
invertebrates	Physiology	T	RCP6	4	0.109393	-0.0302927	0.300441	0.135074	225.479	3	1.31323e-48
invertebrates	Physiology	T	RCP8	37	0.0872938	-0.353177	0.0240707	-0.164553	296.848	36	9.06132e-43
invertebrates	Physiology	T	extreme	36	0.773159	-0.21406	0.15917	-0.0274448	1637.42	35	3.8043054729776e-322
invertebrates	Physiology	TpCO2	RCP8	31	0.986656	-0.114227	0.116194	0.000983128	285.364	30	1.9918e-43
invertebrates	Physiology	TpCO2	extreme	15	0.967711	-0.224525	0.215439	-0.00454331	163.941	14	1.14241e-27
invertebrates	Physiology	pCO2	RCP6	17	0.580859	-0.166965	0.093571	-0.036697	46.5881	16	7.89309e-05
invertebrates	Physiology	pCO2	RCP8	48	0.788113	-0.124288	0.0943123	-0.0149878	991.632	47	4.0314e-177
invertebrates	Physiology	pCO2	extreme	17	0.852413	-0.356381	0.29459	-0.0308951	767.603	16	5.14447e-153
invertebrates	Physiology	T	all	77	0.197209	-0.207429	0.0427956	-0.0823169	2229.19	76	0
invertebrates	Physiology	pCO2	all	82	0.736084	-0.115046	0.0812843	-0.0168809	1861.82	81	0
invertebrates	Physiology	TpCO2	all	94	0.540306	-0.149571	0.078359	-0.035606	2565.61	93	0
invertebrates	Reproduction	T	RCP6	4	0.979604	-0.0330298	0.0321792	-0.000425287	4.04486	3	0.25666
invertebrates	Reproduction	T	RCP8	18	0.475452	-0.0804321	0.0374943	-0.0214689	99.7786	17	9.77795e-14
invertebrates	Reproduction	T	extreme	30	0.0627142	-0.300118	0.00775604	-0.146181	344.03	29	1.40229e-55
invertebrates	Reproduction	TpCO2	RCP6	2	0.400166	-0.068393	0.0273114	-0.0205408	2.00083	1	0.157213
invertebrates	Reproduction	TpCO2	RCP8	10	0.209808	-0.0282599	0.00620644	-0.0110267	21.7639	9	0.00965818
invertebrates	Reproduction	TpCO2	extreme	28	0.00468057	-0.0462749	-0.00839128	-0.0273331	77.8279	27	8.0231e-07
invertebrates	Reproduction	pCO2	RCP6	4	0.597314	-0.0542381	0.0312079	-0.0115151	6.58001	3	0.08656
invertebrates	Reproduction	pCO2	RCP8	28	0.162209	-0.0305554	0.00511692	-0.0127192	136.298	27	1.49518e-16
invertebrates	Reproduction	pCO2	extreme	23	0.110261	-0.556797	0.0568134	-0.249992	248.716	22	2.60025e-40
invertebrates	Reproduction	T	all	52	0.0338913	-0.172472	-0.00682052	-0.0896463	460.534	51	2.69155e-67
invertebrates	Reproduction	pCO2	all	55	0.0359977	-0.255527	-0.00862839	-0.132078	395.363	54	1.98765e-53
invertebrates	Reproduction	TpCO2	all	92	0.000335432	-0.254935	-0.074754	-0.164844	805.96	91	5.29379e-115
invertebrates	Survival	T	RCP6	6	0.224627	-1.10705	0.26005	-0.423501	175.095	5	5.96828e-36
invertebrates	Survival	T	RCP8	24	0.216462	-0.128189	0.0290383	-0.0495752	130.963	23	4.26512e-17
invertebrates	Survival	T	extreme	34	0.548897	-0.214972	0.114278	-0.0503471	277.799	33	1.67645e-40
invertebrates	Survival	TpCO2	RCP8	17	0.072024	-0.297705	0.0127509	-0.142477	152.899	16	2.09257e-24
invertebrates	Survival	TpCO2	extreme	26	0.730816	-0.523817	0.367381	-0.0782178	189.094	25	3.78586e-27
invertebrates	Survival	pCO2	RCP6	6	0.0754111	-0.140917	0.00686161	-0.0670279	12.6219	5	0.0271919
invertebrates	Survival	pCO2	RCP8	44	0.0225681	-0.153257	-0.0115903	-0.0824236	750.038	43	7.57054e-130
invertebrates	Survival	pCO2	extreme	60	3.14446e-05	-0.474354	-0.170659	-0.322507	6160.46	59	0
invertebrates	Survival	T	all	64	0.105554	-0.21147	0.0201786	-0.0956457	605.958	63	9.53351e-90
invertebrates	Survival	pCO2	all	110	2.29403e-06	-0.255335	-0.105626	-0.18048	7212.33	109	0
invertebrates	Survival	TpCO2	all	120	1.07123e-05	-0.371403	-0.142573	-0.256988	2513.03	119	0
