# Supplementary material for: Hidden impacts of climate change on biological responses of marine life
Source: Research Square preprint supplement (doi:10.21203/rs.3.rs-3085741/v1), 2023-07-27
Supplement: Supplementary file 7 [file e7a7f2c77e191b999ddd49cb.xlsx]

## Sheet: Sheet1
Biological response	Driver	Rosenthal number	Threshold	Original p-value	Trim p-value
Fish
Development	T	9934	105	0.001	0.001
	T pCO2	23357	115	0	0
Growth	pCO2	1889	240	0.034	0.034
Metabolism	T	24009	245	0	0
	T pCO2	8360	260	0	0
Physiology	T	1876	340	0.038	0.001
Reproduction	T	102	45	0.015	0.015
Survival	T	12187	160	0.005	0.005
	T pCO2	45731	180	0	0
Invertebrates
Behavior	pCO2	990	210	0.014	0.014
Biomechanics	pCO2	358	125	0.009	0.009
Calcification	pCO2	27372	265	0.003	0
	T pCO2	2735	290	0.005	0.005
Development	pCO2	2115	550	0	0
	T pCO2	58487	655	0	0
Growth	pCO2	23470	630	0	0
	T pCO2	30042	750	0.002	0
	T	5127	215	0	0
	T pCO2	8010	265	0	0
Reproduction	pCO2	1036	285	0.036	0.036
	T	910	270	0.034	0.034
	T pCO2	8010	470	0	0
Survival	pCO2	13383	560	0	0
	T pCO2	25970	610	0	0
