# Supplementary material for: Hidden impacts of climate change on biological responses of marine life
Source: Research Square preprint supplement (doi:10.21203/rs.3.rs-3085741/v1), 2023-07-27
Supplement: Supplementary file 8 [file ef2889d78df341e7d6653ec8.xlsx]

## Sheet: Sheet1
			Model heterogeneity			Residual heterogeneity
Biological response	Driver	n	Qm	df	p	Qe	df	p
Fish
Behavior	T	38	5.32	2	0.07	290	35	0
	pCO2	33	2.93	2	0.23	264	30	0
	T pCO2	43	4.87	2	0.09	286	29	0
Development	T	19	0.01	2	1	1916	16	0
	pCO2	15	1.39	2	0.5	1641	12	0
	T pCO2	21	5.15	1	0.02	174	6	0
Growth	T	60	0.52	2	0.77	2999	57	0
	T pCO2	70	4.75	2	0.09	2760	40	0
	pCO2	46	1.27	2	0.53	1071	43	0
Metabolism	T	47	4.32	2	0.12	718	44	0
	pCO2	34	8.84	1	0	331	31	0
	T pCO2	50	1.44	1	0.23	443	24	0
Physiology	T	66	0.12	2	0.94	805	63	0
	T pCO2	70	1.47	2	0.48	342	38	0
	pCO2	53	0.45	2	0.8	385	50	0
Reproduction	T	7	0.68	1	0.41	48	4	0
	pCO2	6	0.89	2	0.64	13	3	0.004
	T pCO2	10	NA	NA	NA	NA	NA	NA
Survival	T	30	3.3	2	0.19	582	27	0
	pCO2	24	1.41	2	0.49	892	21	0
	T pCO2	34	5.78	1	0.02	2676	18	0
Invertebrates
Behavior	pCO2	40	0.15	2	0.93	331	37	0
	T	40	5.25	2	0.07	937	37	0
	T pCO2	49	0.3	1	0.58	497	18	0
Biomechanics	pCO2	23	4.55	2	0.1	80	20	0
	T	18	2.68	2	0.26	142	15	0
	T pCO2	24	1.26	1	0.26	70	9	0
Biodiversity	pCO2	9	0.65	1	0.42	21	6	0.004
	T pCO2	9	NA	NA	NA	NA	NA	NA
	T	3	NA	NA	NA	NA	NA	NA
Calcification	pCO2	51	1.35	2	0.51	19877	48	0
	T	43	0.13	2	0.94	288	40	0
	T pCO2	56	8.89	2	0.01	480	25	0
Development	pCO2	108	2.59	2	0.27	1890	105	0
	T	72	9.54	2	0.01	2887	69	0
	T pCO2	129	7.16	2	0.03	2714	59	0
Growth	pCO2	124	7.06	2	0.03	2461	121	0
	T	92	0.2	2	0.9	1499	89	0
	T pCO2	148	1.75	2	0.42	2701	68	0
Metabolism	pCO2	41	0.84	2	0.66	99	38	0
	T	41	10.26	1	0	306	38	0
	T pCO2	51	7.92	1	0	395	29	0
Physiology	pCO2	82	0.01	2	1	1806	79	0
	T	77	1.8	2	0.41	2160	74	0
	T pCO2	94	0.02	1	0.88	449	43	0
Reproduction	pCO2	55	1.04	2	0.6	392	52	0
	T	52	1.25	2	0.53	448	49	0
	T pCO2	92	1.33	2	0.51	102	37	0
Survival	T pCO2	120	0.59	2	0.74	342	41	0
	pCO2	110	7.03	2	0.03	6923	107	0
	T	64	3.02	2	0.22	584	61	0
